# Supplementary material
Source: publisher figshare collection journal article supplement (https://geolsoc.figshare.com/ndownloader/files/5422526)
Supplement: Supplementary file 1 [file 5422526]

							Analysis ID	Isotopic ratios					Apparent ages (Ma)								Uncertainty (%)	Discord (%)			old
extra id	Number	F1	Sample	F3	Latitude	longitude		207Pb/235U	� (%)	206Pb/238U	� (%)	Th/U	207Pb/235U (Ma)	� (Ma)	206Pb/238U (Ma)	� (Ma)	207Pb/206Pb (Ma)	� (Ma)	Preferred age (Ma)	� (Ma)			incertidumbre > 10%	>300	valor discor dancia	discord.	discord. Inv.	E	N	Lat	Long	N1	grains_aft	150_Ma	syndep	younger_th	Unit	FINAL AGE	Age	New_Age	Revised_ag	final_age	__150_Ma	150Ma	Author	F21	F22
32	U28	30	COR1001	1072-133	5.8196200	-72.8425010																			0.000			1137170	1135127	0.0000	0.0000		98	6	1	0	Socha Inferior	Early Paleocene		Early Paleocene?	Eary - Middle Paleocene	Early - Middle Paleocene	5	5	This work
							1072133az1_1_Zrn	1.782	0.047	0.176	0.007		1038.938	47.264	1045.313	43.175	1022.367	65.068	1022.367	65.068	6.364	-2.244		old	-2.244
							1072133az1_2_Zrn	4.836	0.123	0.326	0.012		1791.242	121.135	1818.194	79.590	1758.322	57.294	1758.322	57.294	3.258	-3.405		old	-3.405
							1072133az1_3_Zrn	4.349	0.110	0.303	0.012		1702.709	109.136	1708.440	74.111	1696.457	57.681	1696.457	57.681	3.400	-0.706		old	-0.706
							1072133az1_4_Zrn	1.727	0.044	0.172	0.007		1018.498	44.558	1024.519	42.173	1004.223	64.025	1004.223	64.025	6.376	-2.021		old	-2.021
							1072133az1_5_Zrn	1.559	0.040	0.158	0.006		954.195	40.706	947.783	38.828	968.855	64.842	947.783	38.828	4.097	2.175		old	2.175
							1072133az1_6_Zrn	1.683	0.043	0.169	0.006		1002.084	43.141	1005.937	41.337	991.393	63.836	991.393	63.836	6.439	-1.467		old	-1.467
							1072133az1_7_Zrn	3.490	0.090	0.268	0.010		1524.867	89.173	1530.497	65.546	1517.936	59.565	1517.936	59.565	3.924	-0.828		old	-0.828
							1072133az1_8_Zrn	3.039	0.080	0.247	0.009		1417.462	79.188	1421.376	60.503	1407.562	61.212	1407.562	61.212	4.349	-0.981		old	-0.981
							1072133az1_9_Zrn	4.740	0.121	0.314	0.012		1774.314	118.854	1761.263	76.749	1789.202	57.086	1789.202	57.086	3.191	1.562		old	1.562
							1072133az1_10_Zrn	3.458	0.088	0.265	0.010		1517.791	87.667	1516.418	64.800	1517.553	59.230	1517.553	59.230	3.903	0.075		old	0.075
							1072133az1_11_Zrn	4.637	0.118	0.314	0.012		1756.000	116.468	1762.799	76.771	1748.703	57.403	1748.703	57.403	3.283	-0.806		old	-0.806
							1072133az1_12_Zrn	3.381	0.086	0.258	0.010		1499.979	85.519	1477.094	62.923	1531.915	59.002	1531.915	59.002	3.851	3.579		old	3.579
							1072133az1_13_Zrn	3.334	0.093	0.251	0.010		1489.057	92.737	1444.319	64.770	1553.011	63.867	1553.011	63.867	4.112	6.999		old	6.999
							1072133az1_14_Zrn	3.189	0.082	0.255	0.010		1454.567	81.584	1462.563	62.304	1443.809	60.125	1443.809	60.125	4.164	-1.299		old	-1.299
							1072133az1_15_Zrn	3.338	0.086	0.261	0.010		1489.927	85.292	1494.597	63.848	1483.018	59.835	1483.018	59.835	4.035	-0.781		old	-0.781
							1072133az1_16_Zrn	1.623	0.043	0.163	0.006		979.045	43.605	972.434	39.991	989.095	66.026	972.434	39.991	4.112	1.684		old	1.684
							1072133az1_17_Zrn	3.062	0.079	0.246	0.009		1423.113	78.471	1415.444	60.096	1431.329	60.251	1431.329	60.251	4.209	1.110		old	1.110
							1072133az1_18_Zrn	3.300	0.084	0.256	0.010		1480.951	83.715	1468.301	62.557	1498.502	59.385	1498.502	59.385	3.963	2.015		old	2.015
							1072133az1_19_Zrn	2.289	0.059	0.206	0.008		1208.809	58.763	1205.269	50.277	1214.587	61.983	1214.587	61.983	5.103	0.767		old	0.767
							1072133az1_20_Zrn	0.090	0.003	0.013	0.000		87.421	3.402	81.365	3.162	249.333	95.703	81.365	3.162	3.886	67.367		young	0.000
							1072133az1_21_Zrn	1.447	0.039	0.152	0.006		908.579	39.058	914.018	37.325	895.656	67.029	914.018	37.325	4.084	-2.050		old	-2.050
							1072133az1_22_Zrn	4.622	0.118	0.309	0.012		1753.159	116.196	1736.692	75.621	1771.309	57.323	1771.309	57.323	3.236	1.954		old	1.954
							1072133az1_23_Zrn	4.980	0.128	0.320	0.012		1815.988	126.073	1788.104	78.435	1845.610	57.130	1845.610	57.130	3.095	3.116		old	3.116
							1072133az1_24_Zrn	1.636	0.042	0.164	0.006		984.087	42.298	981.252	40.217	989.190	64.202	981.252	40.217	4.099	0.802		old	0.802
							1072133az1_25_Zrn	4.590	0.120	0.306	0.012		1747.543	118.172	1721.069	75.045	1778.851	58.189	1778.851	58.189	3.271	3.248		old	3.248
							1072133az1_26_Zrn	3.337	0.086	0.260	0.010		1489.716	85.099	1489.023	63.548	1489.020	59.657	1489.020	59.657	4.006	0.000		old	0.000
							1072133az1_27_Zrn	0.158	0.004	0.023	0.001		148.924	4.235	149.022	5.748	144.593	75.381	149.022	5.748	3.857	-3.063		young	0.000
							1072133az1_28_Zrn	undefined	undefined	undefined	undefined		undefined	undefined	undefined	undefined	undefined	undefined	undefined	undefined	#VALUE!	#VALUE!	#VALUE!	old	#VALUE!	#VALUE!	#VALUE!
							1072133az1_29_Zrn	undefined	undefined	undefined	undefined		undefined	undefined	undefined	undefined	undefined	undefined	undefined	undefined	#VALUE!	#VALUE!	#VALUE!	old	#VALUE!	#VALUE!	#VALUE!
							1072133az1_30_Zrn	4.245	0.139	0.292	0.011		1682.830	136.731	1653.676	72.476	1718.381	69.113	1718.381	69.113	4.022	3.765		old	3.765
							1072133az1_31_Zrn	1.432	0.037	0.149	0.006		902.364	37.571	897.469	36.583	910.418	65.615	897.469	36.583	4.076	1.422		old	1.422
							1072133az1_32_Zrn	2.223	0.059	0.200	0.008		1188.473	58.585	1173.833	49.012	1215.477	62.920	1215.477	62.920	5.177	3.426		old	3.426
							1072133az1_33_Zrn	undefined	undefined	undefined	undefined		undefined	undefined	undefined	undefined	undefined	undefined	undefined	undefined	#VALUE!	#VALUE!	#VALUE!	old	#VALUE!	#VALUE!	#VALUE!
							1072133az1_34_Zrn	4.554	0.116	0.307	0.012		1740.897	114.112	1726.273	74.914	1758.312	57.226	1758.312	57.226	3.255	1.822		old	1.822
							1072133az1_35_Zrn	3.559	0.092	0.267	0.010		1540.512	90.856	1527.103	65.371	1551.921	59.289	1551.921	59.289	3.820	1.599		old	1.599
							1072133az1_36_Zrn	1.414	0.038	0.149	0.006		894.714	37.768	893.509	36.462	894.912	66.589	893.509	36.462	4.081	0.157		old	0.157
							1072133az1_37_Zrn	3.584	0.093	0.267	0.010		1546.052	92.052	1524.228	65.420	1575.189	59.413	1575.189	59.413	3.772	3.235		old	3.235
							1072133az1_38_Zrn	4.617	0.118	0.313	0.012		1752.294	116.219	1753.789	76.456	1751.226	57.482	1751.226	57.482	3.282	-0.146		old	-0.146
							1072133az1_39_Zrn	0.930	0.172	0.096	0.007		667.607	167.098	592.919	47.013	930.344	374.516	592.919	47.013	7.929	36.269		old	36.269	disc
							1072133az1_40_Zrn	5.749	0.147	0.347	0.013		1938.808	144.226	1921.460	85.018	1954.087	56.217	1954.087	56.217	2.877	1.670		old	1.670
							1072133az1_41_Zrn	4.238	0.117	0.288	0.011		1681.344	115.327	1631.045	73.489	1747.484	60.114	1747.484	60.114	3.440	6.663		old	6.663
							1072133az1_42_Zrn	4.925	0.126	0.322	0.012		1806.528	124.375	1798.684	78.908	1813.293	57.237	1813.293	57.237	3.157	0.806		old	0.806
							1072133az1_43_Zrn	0.079	0.004	0.011	0.000		76.846	3.834	71.364	2.899	239.415	118.198	71.364	2.899	4.063	70.192		young	0.000
							1072133az1_44_Zrn	0.093	0.003	0.013	0.000		90.166	3.394	81.978	3.220	290.372	92.256	81.978	3.220	3.928	71.768		young	0.000
							1072133az1_45_Zrn	4.856	0.127	0.318	0.012		1794.572	124.726	1780.614	78.593	1807.497	57.775	1807.497	57.775	3.196	1.487		old	1.487
							1072133az1_46_Zrn	3.997	0.105	0.285	0.011		1633.607	103.705	1616.983	70.630	1652.757	59.079	1652.757	59.079	3.575	2.165		old	2.165
							1072133az1_47_Zrn	2.671	0.069	0.226	0.009		1320.333	68.808	1312.083	55.450	1335.476	61.125	1335.476	61.125	4.577	1.752		old	1.752
							1072133az1_48_Zrn	3.529	0.090	0.269	0.010		1533.758	89.394	1534.399	65.781	1536.283	59.048	1536.283	59.048	3.844	0.123		old	0.123
							1072133az1_49_Zrn	3.427	0.089	0.264	0.010		1510.565	88.048	1509.055	64.672	1511.038	59.858	1511.038	59.858	3.961	0.131		old	0.131
							1072133az1_50_Zrn	undefined	undefined	undefined	undefined		undefined	undefined	undefined	undefined	undefined	undefined	undefined	undefined	#VALUE!	#VALUE!	#VALUE!	old	#VALUE!	#VALUE!	#VALUE!
							1072133az1_51_Zrn	0.812	0.022	0.099	0.004		603.652	22.157	611.046	24.415	573.506	70.941	611.046	24.415	3.996	-6.546		old	-6.546		disc. inv
							1072133az1_52_Zrn	4.377	0.112	0.301	0.011		1708.088	110.645	1698.050	73.898	1725.320	57.806	1725.320	57.806	3.350	1.581		old	1.581
							1072133az1_53_Zrn	undefined	undefined	undefined	undefined		undefined	undefined	undefined	undefined	undefined	undefined	undefined	undefined	#VALUE!	#VALUE!	#VALUE!	old	#VALUE!	#VALUE!	#VALUE!
							1072133az1_54_Zrn	0.839	0.022	0.101	0.004		618.396	21.938	620.634	24.774	608.989	68.508	620.634	24.774	3.992	-1.912		old	-1.912
							1072133az1_55_Zrn	0.079	0.002	0.012	0.000		76.994	2.147	75.592	2.905	116.051	76.647	75.592	2.905	3.842	34.863		young	0.000
							1072133az1_56_Zrn	0.068	0.002	0.010	0.000		66.613	2.107	64.639	2.521	138.106	83.887	64.639	2.521	3.900	53.197		young	0.000
							1072133az1_57_Zrn	3.352	0.086	0.258	0.010		1493.295	85.522	1481.376	63.237	1508.989	59.518	1508.989	59.518	3.944	1.830		old	1.830
							1072133az1_58_Zrn	3.308	0.087	0.255	0.010		1483.014	86.076	1463.767	62.560	1507.215	60.382	1507.215	60.382	4.006	2.883		old	2.883
							1072133az1_59_Zrn	0.243	0.006	0.035	0.001		221.064	6.471	223.725	8.648	192.803	74.276	223.725	8.648	3.866	-16.038		young	0.000
							1072133az1_60_Zrn	5.081	0.129	0.324	0.012		1832.920	126.963	1809.665	79.153	1860.018	56.541	1860.018	56.541	3.040	2.707		old	2.707
							1072133az1_61_Zrn	2.554	0.065	0.220	0.008		1287.552	64.903	1281.526	53.772	1295.724	60.921	1295.724	60.921	4.702	1.096		old	1.096
							1072133az1_62_Zrn	3.088	0.124	0.240	0.013		1429.698	122.158	1385.468	85.812	1496.169	89.669	1496.169	89.669	5.993	7.399		old	7.399
							1072133az1_63_Zrn	3.731	0.095	0.270	0.010		1578.033	94.406	1542.569	66.308	1626.418	58.439	1626.418	58.439	3.593	5.155		old	5.155
							1072133az1_64_Zrn	undefined	undefined	undefined	undefined		undefined	undefined	undefined	undefined	undefined	undefined	undefined	undefined	#VALUE!	#VALUE!	#VALUE!	old	#VALUE!	#VALUE!	#VALUE!
							1072133az1_65_Zrn	1.575	0.040	0.162	0.006		960.542	40.444	966.254	39.561	947.903	64.268	966.254	39.561	4.094	-1.936		old	-1.936
							1072133az1_66_Zrn	1.657	0.043	0.164	0.006		992.237	43.002	980.060	40.215	1018.167	64.116	980.060	40.215	4.103	3.743		old	3.743
							1072133az1_67_Zrn	4.459	0.113	0.302	0.012		1723.345	111.954	1703.675	73.935	1747.737	57.371	1747.737	57.371	3.283	2.521		old	2.521
							1072133az1_68_Zrn	0.634	0.017	0.079	0.003		498.354	16.885	488.864	19.456	544.383	70.173	488.864	19.456	3.980	10.199		old	10.199
							1072133az1_69_Zrn	5.447	0.139	0.340	0.013		1892.211	136.562	1888.129	83.243	1897.331	56.530	1897.331	56.530	2.979	0.485		old	0.485
							1072133az1_70_Zrn	3.248	0.083	0.254	0.010		1468.612	82.148	1459.386	62.142	1480.906	59.389	1480.906	59.389	4.010	1.453		old	1.453
							1072133az1_71_Zrn	2.737	0.070	0.228	0.009		1338.638	69.692	1325.171	55.850	1361.664	60.498	1361.664	60.498	4.443	2.680		old	2.680
							1072133az1_72_Zrn	4.381	0.113	0.297	0.011		1708.817	111.136	1674.791	72.930	1753.955	57.794	1753.955	57.794	3.295	4.513		old	4.513
							1072133az1_73_Zrn	2.587	0.066	0.222	0.008		1297.096	65.906	1293.933	54.394	1300.811	61.000	1300.811	61.000	4.689	0.529		old	0.529
							1072133az1_74_Zrn	3.803	0.097	0.278	0.011		1593.455	95.866	1581.516	67.940	1621.983	58.221	1621.983	58.221	3.590	2.495		old	2.495
							1072133az1_75_Zrn	1.028	0.027	0.115	0.004		717.761	27.524	703.050	28.528	760.400	68.169	703.050	28.528	4.058	7.542		old	7.542
							1072133az1_76_Zrn	4.634	0.118	0.312	0.012		1755.374	116.503	1749.080	76.143	1761.885	57.362	1761.885	57.362	3.256	0.727		old	0.727
							1072133az1_77_Zrn	2.469	0.063	0.219	0.008		1263.118	63.053	1277.819	53.629	1237.333	61.604	1237.333	61.604	4.979	-3.272		old	-3.272
							1072133az1_78_Zrn	3.983	0.102	0.284	0.011		1630.737	100.559	1610.178	69.260	1656.290	58.106	1656.290	58.106	3.508	2.784		old	2.784
							1072133az1_79_Zrn	5.123	0.131	0.328	0.012		1839.983	128.861	1829.502	80.315	1852.882	56.886	1852.882	56.886	3.070	1.262		old	1.262
							1072133az1_80_Zrn	2.605	0.066	0.222	0.008		1301.908	66.301	1293.003	54.354	1316.237	60.844	1316.237	60.844	4.623	1.765		old	1.765
							1072133az1_81_Zrn	4.573	0.116	0.307	0.012		1744.277	114.781	1727.140	75.039	1765.648	57.270	1765.648	57.270	3.244	2.181		old	2.181
							1072133az1_82_Zrn	3.498	0.090	0.261	0.010		1526.839	89.383	1495.981	64.356	1569.772	59.303	1569.772	59.303	3.778	4.701		old	4.701
							1072133az1_83_Zrn	4.472	0.114	0.304	0.012		1725.837	112.708	1710.265	74.327	1744.894	57.570	1744.894	57.570	3.299	1.985		old	1.985
							1072133az1_84_Zrn	undefined	undefined	undefined	undefined		undefined	undefined	undefined	undefined	undefined	undefined	undefined	undefined	#VALUE!	#VALUE!	#VALUE!	old	#VALUE!	#VALUE!	#VALUE!
							1072133az1_85_Zrn	2.916	0.075	0.235	0.009		1386.169	74.757	1361.122	57.870	1426.454	60.386	1426.454	60.386	4.233	4.580		old	4.580
							1072133az1_86_Zrn	1.657	0.046	0.164	0.006		992.258	45.845	981.241	40.466	1012.807	67.147	981.241	40.466	4.124	3.117		old	3.117
							1072133az1_87_Zrn	5.012	0.127	0.322	0.012		1821.428	125.364	1798.150	78.623	1848.105	56.664	1848.105	56.664	3.066	2.703		old	2.703
							1072133az1_88_Zrn	4.513	0.115	0.304	0.012		1733.321	113.330	1712.311	74.353	1758.182	57.319	1758.182	57.319	3.260	2.609		old	2.609
							1072133az1_89_Zrn	0.896	0.023	0.105	0.004		649.781	23.110	645.685	25.788	657.345	67.325	645.685	25.788	3.994	1.774		old	1.774
							1072133az1_90_Zrn	undefined	undefined	undefined	undefined		undefined	undefined	undefined	undefined	undefined	undefined	undefined	undefined	#VALUE!	#VALUE!	#VALUE!	old	#VALUE!	#VALUE!	#VALUE!
							1072133az1_91_Zrn	4.609	0.120	0.305	0.012		1750.854	118.737	1718.445	74.941	1789.763	58.076	1789.763	58.076	3.245	3.985		old	3.985
							1072133az1_92_Zrn	3.252	0.085	0.257	0.010		1469.660	84.060	1473.998	63.010	1462.878	60.377	1462.878	60.377	4.127	-0.760		old	-0.760
							1072133az1_93_Zrn	4.649	0.119	0.312	0.012		1758.111	116.917	1749.694	76.266	1769.915	57.279	1769.915	57.279	3.236	1.143		old	1.143
							1072133az1_94_Zrn	2.718	0.080	0.224	0.009		1333.329	79.912	1300.671	60.087	1393.018	67.908	1393.018	67.908	4.875	6.629		old	6.629
							1072133az1_95_Zrn	3.210	0.084	0.254	0.010		1459.643	83.232	1457.526	62.200	1463.762	60.539	1463.762	60.539	4.136	0.426		old	0.426
							1072133az1_96_Zrn	undefined	undefined	undefined	undefined		undefined	undefined	undefined	undefined	undefined	undefined	undefined	undefined	#VALUE!	#VALUE!	#VALUE!	old	#VALUE!	#VALUE!	#VALUE!
							1072133az1_97_Zrn	5.106	0.130	0.323	0.012		1837.074	128.197	1802.479	79.033	1875.900	56.627	1875.900	56.627	3.019	3.914		old	3.914
							1072133az1_98_Zrn	4.878	0.124	0.316	0.012		1798.412	122.157	1772.572	77.359	1829.083	56.779	1829.083	56.779	3.104	3.090		old	3.090
							1072133az1_99_Zrn	4.699	0.120	0.315	0.012		1767.093	118.603	1763.268	76.981	1774.036	57.412	1774.036	57.412	3.236	0.607		old	0.607
							1072133az1_100_Zrn	undefined	undefined	undefined	undefined		undefined	undefined	undefined	undefined	undefined	undefined	undefined	undefined	#VALUE!	#VALUE!	#VALUE!	old	#VALUE!	#VALUE!	#VALUE!
							1072133az1_101_Zrn	5.169	0.133	0.328	0.013		1847.565	131.171	1829.552	80.721	1865.596	57.104	1865.596	57.104	3.061	1.932		old	1.932
							1072133az1_102_Zrn	3.959	0.103	0.279	0.011		1625.784	101.816	1588.529	68.907	1673.486	58.716	1673.486	58.716	3.509	5.077		old	5.077
							1072133az1_103_Zrn	3.367	0.086	0.255	0.010		1496.740	85.850	1465.639	62.637	1538.948	59.278	1538.948	59.278	3.852	4.764		old	4.764
							1072133az1_104_Zrn	4.254	0.109	0.296	0.011		1684.603	108.243	1673.707	72.749	1697.242	58.124	1697.242	58.124	3.425	1.387		old	1.387
							1072133az1_105_Zrn	5.204	0.133	0.325	0.012		1853.304	130.461	1816.080	79.577	1895.451	56.426	1895.451	56.426	2.977	4.187		old	4.187
							1072133az1_106_Zrn	3.387	0.087	0.255	0.010		1501.411	86.307	1466.431	62.676	1551.919	59.212	1551.919	59.212	3.815	5.509		old	5.509
							1072133az1_107_Zrn	1.654	0.042	0.164	0.006		991.041	42.473	980.348	40.257	1014.983	63.637	980.348	40.257	4.106	3.412		old	3.412
							1072133az1_108_Zrn	2.753	0.071	0.228	0.009		1342.790	70.453	1326.455	56.087	1368.339	60.606	1368.339	60.606	4.429	3.061		old	3.061
							1072133az1_109_Zrn	3.273	0.084	0.257	0.010		1474.674	83.677	1474.039	62.931	1476.539	59.848	1476.539	59.848	4.053	0.169		old	0.169
							1072133az1_110_Zrn	0.653	0.017	0.082	0.003		510.149	17.121	509.573	20.193	511.711	69.685	509.573	20.193	3.963	0.418		old	0.418
33	U29	35	COR1006	1072-138	5.8943280	-72.8131390																						1140404	1143398	0.0000	0.0000		101	6	0	0	Socha Inferior	Early Paleocene		Early Paleocene?	Early - Middle Paleocene	Early - Middle Paleocene	6	6	This work
							1072138az1_1_Zrn	4.6180	0.1182	0.3098	0.0118		1752.53	116.57	1739.93	75.90	1765.67	57.48	1765.670	57.481	3.255	1.458		old	1.458
							1072138az1_2_Zrn	2.1687	0.0569	0.2011	0.0077		1171.06	56.96	1181.34	49.49	1150.00	63.52	1150.004	63.521	5.524	-2.725		old	-2.725
							1072138az1_3_Zrn	2.1479	0.0588	0.1900	0.0074		1164.39	58.83	1121.38	47.33	1239.13	64.59	1239.125	64.591	5.213	9.503		old	9.503
							1072138az1_4_Zrn	3.7266	0.0959	0.2766	0.0106		1577.11	95.07	1574.31	67.95	1578.10	59.07	1578.096	59.071	3.743	0.240		old	0.240
							1072138az1_5_Zrn	5.0236	0.1318	0.3266	0.0125		1823.30	129.58	1822.09	80.64	1823.19	57.56	1823.190	57.565	3.157	0.060		old	0.060
							1072138az1_6_Zrn	2.7989	0.0740	0.2344	0.0090		1355.23	73.81	1357.39	57.62	1355.33	62.14	1355.328	62.142	4.585	-0.152		old	-0.152
							1072138az1_7_Zrn	4.6336	0.1190	0.3103	0.0118		1755.35	117.34	1742.33	76.11	1769.72	57.56	1769.720	57.562	3.253	1.548		old	1.548
							1072138az1_8_Zrn	2.6168	0.0670	0.2223	0.0085		1305.36	66.96	1294.02	54.47	1326.44	60.90	1326.438	60.904	4.592	2.444		old	2.444
							1072138az1_9_Zrn	2.5068	0.0653	0.2174	0.0083		1274.01	65.22	1268.11	53.51	1282.99	61.98	1282.994	61.984	4.831	1.160		old	1.160
							1072138az1_10_Zrn	4.7768	0.1223	0.3165	0.0121		1780.84	120.53	1772.75	77.59	1793.86	57.29	1793.860	57.294	3.194	1.177		old	1.177
							1072138az1_11_Zrn	0.0774	0.0023	0.0112	0.0004		75.73	2.32	71.74	2.80	199.56	80.68	71.735	2.801	3.904	64.053		young	0.000
							1072138az1_12_Zrn	4.2489	0.1103	0.2895	0.0111		1683.52	108.98	1639.14	71.50	1740.12	58.22	1740.120	58.217	3.346	5.803		old	5.803
							1072138az1_13_Zrn	4.8016	0.1236	0.3144	0.0120		1785.17	121.81	1762.28	77.05	1811.99	57.38	1811.986	57.379	3.167	2.743		old	2.743
							1072138az1_14_Zrn	2.7767	0.0714	0.2312	0.0088		1349.29	71.19	1340.61	56.72	1362.63	60.74	1362.630	60.738	4.457	1.616		old	1.616
							1072138az1_15_Zrn	1.6811	0.0442	0.1698	0.0065		1001.38	44.39	1011.18	41.84	979.28	65.19	979.276	65.191	6.657	-3.258		old	-3.258
							1072138az1_16_Zrn	1.7013	0.0443	0.1702	0.0065		1009.01	44.52	1013.14	41.81	998.17	64.66	998.171	64.657	6.478	-1.500		old	-1.500
							1072138az1_17_Zrn	1.5283	0.0415	0.1585	0.0061		941.81	41.67	948.16	39.03	925.96	67.25	948.163	39.030	4.116	-2.398		old	-2.398
							1072138az1_18_Zrn	4.7526	0.1226	0.3152	0.0120		1776.57	120.85	1766.35	77.32	1786.31	57.70	1786.305	57.703	3.230	1.117		old	1.117
							1072138az1_19_Zrn	2.1157	0.0543	0.1939	0.0074		1153.94	54.40	1142.39	47.56	1173.15	62.40	1173.149	62.401	5.319	2.622		old	2.622
							1072138az1_20_Zrn	3.1830	0.0823	0.2533	0.0097		1453.05	81.93	1455.63	62.07	1448.10	60.37	1448.103	60.374	4.169	-0.520		old	-0.520
							1072138az1_21_Zrn	4.4543	0.1137	0.3002	0.0114		1722.50	112.31	1692.44	73.46	1758.01	57.48	1758.014	57.480	3.270	3.730		old	3.730
							1072138az1_22_Zrn	3.0148	0.0773	0.2425	0.0092		1411.36	77.04	1399.64	59.35	1427.54	60.16	1427.536	60.155	4.214	1.954		old	1.954
							1072138az1_23_Zrn	2.6371	0.0700	0.2205	0.0085		1311.05	69.87	1284.56	54.51	1349.98	62.35	1349.978	62.349	4.619	4.846		old	4.846
							1072138az1_24_Zrn	0.0783	0.0032	0.0109	0.0004		76.59	3.26	70.16	2.71	250.40	102.64	70.164	2.713	3.867	71.979		young	0.000
							1072138az1_25_Zrn	0.3681	0.0097	0.0493	0.0019		318.24	9.78	310.43	12.18	374.74	72.02	310.432	12.177	3.923	17.161		old	17.161
							1072138az1_26_Zrn	7.0363	0.1839	0.3794	0.0146		2116.03	178.65	2073.56	93.95	2158.36	55.72	2158.360	55.721	2.582	3.929		old	3.929
							1072138az1_27_Zrn	3.3187	0.0848	0.2567	0.0098		1485.46	84.28	1472.90	62.80	1501.29	59.34	1501.294	59.342	3.953	1.891		old	1.891
							1072138az1_28_Zrn	4.7109	0.1207	0.3100	0.0118		1769.18	119.02	1740.85	76.10	1803.29	57.29	1803.294	57.293	3.177	3.463		old	3.463
							1072138az1_29_Zrn	3.3562	0.0863	0.2541	0.0097		1494.24	85.82	1459.57	62.36	1541.29	59.33	1541.294	59.335	3.850	5.302		old	5.302
							1072138az1_30_Zrn	3.3001	0.0845	0.2571	0.0098		1481.07	84.01	1475.16	62.94	1489.04	59.58	1489.041	59.581	4.001	0.932		old	0.932
							1072138az1_31_Zrn	undefined	undefined	undefined	undefined		undefined	undefined	undefined	undefined	undefined	undefined	undefined	undefined	#VALUE!	#VALUE!	#VALUE!	old	#VALUE!	#VALUE!	#VALUE!
							1072138az1_32_Zrn	1.6701	0.0443	0.1633	0.0063		997.23	44.54	975.04	40.33	1043.42	65.15	975.039	40.334	4.137	6.554		old	6.554
							1072138az1_33_Zrn	11.8778	0.3036	0.4880	0.0186		2594.82	287.04	2562.06	119.52	2620.47	52.36	2620.465	52.358	1.998	2.229		old	2.229
							1072138az1_34_Zrn	1.6163	0.0421	0.1604	0.0061		976.55	42.30	958.93	39.39	1013.63	64.52	958.926	39.394	4.108	5.397		old	5.397
							1072138az1_35_Zrn	4.3808	0.1120	0.2977	0.0113		1708.72	110.68	1680.05	72.92	1743.09	57.63	1743.090	57.626	3.306	3.617		old	3.617
							1072138az1_36_Zrn	2.5141	0.0643	0.2168	0.0082		1276.13	64.24	1265.04	53.07	1288.39	61.16	1288.392	61.160	4.747	1.813		old	1.813
							1072138az1_37_Zrn	4.6283	0.1183	0.3072	0.0117		1754.39	116.72	1726.91	75.21	1784.98	57.32	1784.979	57.319	3.211	3.253		old	3.253
							1072138az1_38_Zrn	4.2869	0.1109	0.2929	0.0112		1690.85	109.59	1656.23	72.25	1733.67	58.20	1733.666	58.198	3.357	4.466		old	4.466
							1072138az1_39_Zrn	1.6989	0.0445	0.1693	0.0065		1008.12	44.73	1008.22	41.75	1008.12	64.17	1008.116	64.172	6.366	-0.011		old	-0.011
							1072138az1_40_Zrn	4.6086	0.1175	0.3104	0.0118		1750.82	115.93	1742.51	75.86	1759.78	57.38	1759.777	57.381	3.261	0.981		old	0.981
							1072138az1_41_Zrn	3.9369	0.1009	0.2845	0.0108		1621.30	99.99	1614.05	69.70	1629.97	58.61	1629.971	58.608	3.596	0.977		old	0.977
							1072138az1_42_Zrn	2.1025	0.0550	0.1920	0.0073		1149.61	55.06	1132.10	47.05	1183.16	63.09	1183.162	63.089	5.332	4.316		old	4.316
							1072138az1_43_Zrn	1.7290	0.0458	0.1725	0.0066		1019.36	46.01	1025.80	42.36	1001.53	65.45	1001.527	65.449	6.535	-2.424		old	-2.424
							1072138az1_44_Zrn	4.0539	0.1033	0.2864	0.0109		1645.09	102.30	1623.46	70.06	1673.30	58.01	1673.303	58.009	3.467	2.979		old	2.979
							1072138az1_45_Zrn	0.6983	0.0208	0.0880	0.0034		537.80	21.01	543.45	21.73	509.04	77.21	543.446	21.725	3.998	-6.759		old	-6.759		disc. inv
							1072138az1_46_Zrn	3.1934	0.0820	0.2529	0.0096		1455.56	81.57	1453.52	61.95	1460.74	59.90	1460.737	59.901	4.101	0.494		old	0.494
							1072138az1_47_Zrn	0.8171	0.0212	0.0993	0.0038		606.43	21.43	610.48	24.34	587.06	68.90	610.476	24.342	3.987	-3.988		old	-3.988
							1072138az1_48_Zrn	3.6067	0.0932	0.2695	0.0103		1551.00	92.49	1538.44	66.07	1567.19	59.37	1567.185	59.368	3.788	1.834		old	1.834
							1072138az1_49_Zrn	1.6847	0.0437	0.1669	0.0064		1002.78	43.88	994.86	41.00	1017.33	64.33	994.862	40.998	4.121	2.209		old	2.209
							1072138az1_50_Zrn	3.9135	0.1027	0.2779	0.0107		1616.48	101.65	1580.59	68.81	1677.27	59.00	1677.269	58.999	3.518	5.764		old	5.764
							1072138az1_51_Zrn	2.6593	0.0681	0.2276	0.0087		1317.22	68.04	1321.90	55.79	1308.34	61.13	1308.342	61.129	4.672	-1.036		old	-1.036
							1072138az1_52_Zrn	1.5046	0.0403	0.1562	0.0060		932.27	40.56	935.87	38.49	919.14	66.79	935.866	38.490	4.113	-1.820		old	-1.820
							1072138az1_53_Zrn	3.2279	0.0833	0.2496	0.0096		1463.87	82.84	1436.24	61.52	1506.59	59.84	1506.588	59.837	3.972	4.670		old	4.670
							1072138az1_54_Zrn	5.0732	0.1300	0.3265	0.0125		1831.63	127.89	1821.34	80.03	1843.08	57.00	1843.078	57.001	3.093	1.179		old	1.179
							1072138az1_55_Zrn	3.4316	0.0873	0.2627	0.0100		1511.67	86.74	1503.41	64.18	1522.87	59.04	1522.874	59.042	3.877	1.278		old	1.278
							1072138az1_56_Zrn	4.8082	0.1227	0.3194	0.0121		1786.34	120.92	1786.58	78.08	1786.06	57.27	1786.062	57.271	3.207	-0.029		old	-0.029
							1072138az1_57_Zrn	4.6027	0.1174	0.3108	0.0118		1749.76	115.88	1744.59	76.00	1756.92	57.43	1756.916	57.431	3.269	0.702		old	0.702
							1072138az1_58_Zrn	4.1931	0.1071	0.2957	0.0113		1672.67	105.89	1670.03	72.38	1674.55	58.03	1674.547	58.033	3.466	0.270		old	0.270
							1072138az1_59_Zrn	86.4900	4.0920	1.0740	0.0524		4540.31	2261.93	4702.58	333.29	4469.97	83.50	4469.969	83.498	1.868	-5.204		old	-5.204		disc. inv
							1072138az1_60_Zrn	0.0825	0.0034	0.0122	0.0005		80.46	3.46	78.00	3.11	182.21	105.27	77.998	3.106	3.983	57.193		young	0.000
							1072138az1_61_Zrn	6.2744	0.1615	0.3571	0.0137		2014.89	157.75	1968.30	87.79	2060.29	55.84	2060.288	55.842	2.710	4.465		old	4.465
							1072138az1_62_Zrn	5.0353	0.1286	0.3250	0.0124		1825.28	126.53	1813.97	79.43	1837.48	56.90	1837.478	56.904	3.097	1.279		old	1.279
							1072138az1_63_Zrn	3.2760	0.0838	0.2597	0.0099		1475.36	83.35	1488.45	63.46	1462.35	59.75	1462.351	59.751	4.086	-1.785		old	-1.785
							1072138az1_64_Zrn	5.1540	0.1315	0.3301	0.0126		1845.06	129.28	1838.82	80.66	1851.60	56.77	1851.596	56.770	3.066	0.690		old	0.690
							1072138az1_65_Zrn	0.2622	0.0069	0.0376	0.0014		236.43	7.01	238.04	9.27	214.78	74.32	238.039	9.268	3.893	-10.828		young	0.000
							1072138az1_66_Zrn	2.5732	0.2051	0.1820	0.0073		1293.04	198.22	1077.82	47.16	1668.84	148.83	1668.844	148.832	8.918	35.415		old	35.415	disc
							1072138az1_67_Zrn	5.1573	0.1310	0.3304	0.0126		1845.61	128.83	1840.29	80.66	1852.41	56.58	1852.411	56.582	3.055	0.654		old	0.654
							1072138az1_68_Zrn	0.7957	0.0205	0.0965	0.0037		594.41	20.70	594.05	23.69	595.38	68.39	594.051	23.691	3.988	0.223		old	0.223
							1072138az1_69_Zrn	4.7422	0.1207	0.3133	0.0119		1774.72	119.02	1756.88	76.56	1796.44	57.03	1796.445	57.028	3.174	2.202		old	2.202
							1072138az1_70_Zrn	undefined	undefined	undefined	undefined		undefined	undefined	undefined	undefined	undefined	undefined	undefined	undefined	#VALUE!	#VALUE!	#VALUE!	old	#VALUE!	#VALUE!	#VALUE!
							1072138az1_71_Zrn	0.4220	0.0109	0.0566	0.0022		357.49	11.09	355.21	13.97	391.61	71.13	355.208	13.971	3.933	9.296		old	9.296
							1072138az1_72_Zrn	1.6752	0.0429	0.1656	0.0063		999.17	43.12	987.59	40.60	1022.26	63.71	987.589	40.599	4.111	3.392		old	3.392
							1072138az1_73_Zrn	5.2797	0.1349	0.3298	0.0126		1865.58	132.57	1837.30	80.76	1894.86	56.53	1894.863	56.534	2.984	3.038		old	3.038
							1072138az1_74_Zrn	3.4600	0.0886	0.2655	0.0101		1518.15	87.99	1518.15	65.00	1518.39	59.33	1518.395	59.331	3.907	0.016		old	0.016
							1072138az1_75_Zrn	2.8467	0.0729	0.2340	0.0089		1367.94	72.69	1355.52	57.33	1385.71	60.44	1385.712	60.439	4.362	2.178		old	2.178
							1072138az1_76_Zrn	5.1721	0.1328	0.3321	0.0127		1848.04	130.56	1848.63	81.40	1846.92	57.04	1846.924	57.035	3.088	-0.092		old	-0.092
							1072138az1_77_Zrn	4.9274	0.1336	0.3149	0.0120		1806.96	131.35	1764.65	77.34	1856.59	59.14	1856.595	59.143	3.186	4.952		old	4.952
							1072138az1_78_Zrn	undefined	undefined	undefined	undefined		undefined	undefined	undefined	undefined	undefined	undefined	undefined	undefined	#VALUE!	#VALUE!	#VALUE!	old	#VALUE!	#VALUE!	#VALUE!
							1072138az1_79_Zrn	3.7282	0.0950	0.2774	0.0105		1577.44	94.28	1578.23	67.81	1574.09	58.70	1574.094	58.705	3.729	-0.263		old	-0.263
							1072138az1_80_Zrn	undefined	undefined	undefined	undefined		undefined	undefined	undefined	undefined	undefined	undefined	undefined	undefined	#VALUE!	#VALUE!	#VALUE!	old	#VALUE!	#VALUE!	#VALUE!
							1072138az1_81_Zrn	4.1000	0.1046	0.2913	0.0111		1654.30	103.52	1647.90	71.27	1662.42	58.14	1662.419	58.138	3.497	0.874		old	0.874
							1072138az1_82_Zrn	0.0884	0.0030	0.0125	0.0005		85.97	3.00	80.13	3.11	253.28	87.73	80.128	3.109	3.880	68.365		young	0.000
							1072138az1_83_Zrn	1.1799	0.0303	0.1288	0.0049		791.26	30.53	781.04	31.55	818.10	65.81	781.043	31.549	4.039	4.530		old	4.530
							1072138az1_84_Zrn	1.6967	0.0436	0.1675	0.0064		1007.28	43.76	998.40	41.02	1025.78	63.75	998.402	41.022	4.109	2.669		old	2.669
							1072138az1_85_Zrn	5.0147	0.1279	0.3230	0.0123		1821.81	125.93	1804.16	79.08	1842.02	56.88	1842.020	56.883	3.088	2.055		old	2.055
							1072138az1_86_Zrn	4.2627	0.1092	0.2974	0.0113		1686.19	107.93	1678.33	72.84	1693.21	58.10	1693.205	58.101	3.431	0.879		old	0.879
							1072138az1_87_Zrn	3.2211	0.0836	0.2474	0.0095		1462.25	83.16	1425.13	61.26	1517.76	59.98	1517.763	59.982	3.952	6.104		old	6.104
							1072138az1_88_Zrn	0.0890	0.0029	0.0123	0.0005		86.59	2.98	78.97	3.04	293.33	85.89	78.971	3.041	3.851	73.078		young	0.000
							1072138az1_89_Zrn	2.3598	0.0615	0.2077	0.0080		1230.52	61.49	1216.35	51.32	1267.50	62.01	1267.499	62.009	4.892	4.035		old	4.035
							1072138az1_90_Zrn	4.9856	0.1268	0.3247	0.0123		1816.88	124.86	1812.73	79.34	1820.61	56.87	1820.610	56.866	3.123	0.433		old	0.433
							1072138az1_91_Zrn	5.0773	0.1294	0.3281	0.0125		1832.33	127.28	1829.29	80.19	1833.74	56.83	1833.741	56.831	3.099	0.243		old	0.243
							1072138az1_92_Zrn	1.6498	0.0421	0.1647	0.0063		989.46	42.35	982.58	40.32	1003.81	63.73	982.577	40.325	4.104	2.116		old	2.116
							1072138az1_93_Zrn	6.6615	0.1703	0.3741	0.0142		2067.53	165.91	2048.72	91.48	2088.05	55.30	2088.055	55.304	2.649	1.884		old	1.884
							1072138az1_94_Zrn	4.7347	0.1207	0.3157	0.0120		1773.40	118.97	1768.86	77.19	1777.19	57.23	1777.194	57.235	3.221	0.469		old	0.469
							1072138az1_95_Zrn	4.0374	0.1027	0.2887	0.0110		1641.76	101.66	1634.89	70.55	1652.48	58.06	1652.483	58.056	3.513	1.065		old	1.065
							1072138az1_96_Zrn	4.7360	0.1209	0.3169	0.0121		1773.63	119.20	1774.40	77.53	1770.95	57.35	1770.951	57.355	3.239	-0.195		old	-0.195
							1072138az1_97_Zrn	3.4860	0.0893	0.2634	0.0100		1524.05	88.69	1507.28	64.42	1545.54	59.17	1545.536	59.172	3.829	2.475		old	2.475
							1072138az1_98_Zrn	5.4320	0.1389	0.3398	0.0129		1889.91	136.40	1885.80	83.10	1893.30	56.57	1893.297	56.568	2.988	0.396		old	0.396
							1072138az1_99_Zrn	5.0289	0.1289	0.3184	0.0121		1824.21	126.81	1782.00	78.01	1872.81	56.82	1872.807	56.816	3.034	4.849		old	4.849
							1072138az1_100_Zrn	undefined	undefined	undefined	undefined		undefined	undefined	undefined	undefined	undefined	undefined	undefined	undefined	#VALUE!	#VALUE!	#VALUE!	old	#VALUE!	#VALUE!	#VALUE!
							1072138az1_101_Zrn	3.3897	0.0866	0.2602	0.0099		1502.02	86.07	1491.00	63.69	1518.92	59.23	1518.922	59.226	3.899	1.838		old	1.838
							1072138az1_102_Zrn	3.6347	0.0934	0.2724	0.0104		1557.17	92.68	1553.14	66.70	1563.23	59.15	1563.231	59.148	3.784	0.645		old	0.645
							1072138az1_103_Zrn	0.0719	0.0039	0.0099	0.0004		70.54	3.93	63.62	2.55	303.03	129.31	63.624	2.554	4.015	79.004		young	0.000
							1072138az1_104_Zrn	4.8710	0.1246	0.3201	0.0122		1797.25	122.72	1790.35	78.29	1805.55	57.18	1805.546	57.176	3.167	0.841		old	0.841
							1072138az1_105_Zrn	3.4699	0.0887	0.2657	0.0101		1520.39	88.17	1519.04	65.01	1522.81	59.30	1522.811	59.297	3.894	0.247		old	0.247
							1072138az1_106_Zrn	6.6363	0.1702	0.3813	0.0145		2064.18	165.82	2082.56	93.30	2044.39	55.70	2044.389	55.700	2.725	-1.867		old	-1.867
							1072138az1_107_Zrn	undefined	undefined	undefined	undefined		undefined	undefined	undefined	undefined	undefined	undefined	undefined	undefined	#VALUE!	#VALUE!	#VALUE!	old	#VALUE!	#VALUE!	#VALUE!
							1072138az1_108_Zrn	0.2723	0.0073	0.0378	0.0014		244.49	7.37	239.07	9.30	296.01	73.79	239.066	9.298	3.889	19.236		young	0.000
							1072138az1_109_Zrn	0.7916	0.0211	0.0946	0.0036		592.07	21.30	582.44	23.41	626.44	69.40	582.443	23.412	4.020	7.024		old	7.024
							1072138az1_110_Zrn	4.9106	0.1251	0.3217	0.0122		1804.09	123.17	1797.80	78.58	1810.88	56.99	1810.878	56.986	3.147	0.722		old	0.722
34	U30	37	US-1001	1072-140	4.5205780	-74.1499290																						992341	991323	0.0000	0.0000		103	36	2	0	Cacho	Early Paleocene		Early Paleocene	Early Paleocene	Early Paleocene	33	33	This work
							1072140az_1_Zrn	0.1212	0.0054	0.0160	0.0007		116.15	5.47	102.07	4.29	400.65	108.58	102.07	4.290	4.203	74.524		young	0.000
							1072140az_2_Zrn	0.1232	0.0042	0.0170	0.0007		117.97	4.26	108.74	4.53	301.57	90.01	108.74	4.529	4.165	63.943		young	0.000
							1072140az_3_Zrn	0.1022	0.0064	0.0133	0.0006		98.76	6.51	85.21	3.67	415.48	145.91	85.21	3.667	4.304	79.491		young	0.000
							1072140az_4_Zrn	0.1017	0.0047	0.0142	0.0006		98.32	4.78	91.04	3.90	274.31	115.50	91.04	3.905	4.289	66.813		young	0.000
							1072140az_5_Zrn	0.7231	0.0202	0.0888	0.0036		552.47	20.43	548.69	23.49	566.39	74.64	548.69	23.492	4.282	3.125		old	3.125
							1072140az_6_Zrn	0.0924	0.0046	0.0125	0.0005		89.76	4.66	79.86	3.37	349.19	120.67	79.86	3.366	4.215	77.129		young	0.000
							1072140az_7_Zrn	0.1892	0.0067	0.0267	0.0011		175.91	6.75	169.96	7.18	244.95	93.20	169.96	7.183	4.226	30.614		young	0.000
							1072140az_8_Zrn	0.6611	0.0188	0.0837	0.0034		515.28	18.97	518.46	22.17	491.93	76.44	518.46	22.172	4.276	-5.393		old	-5.393		disc. inv
							1072140az_9_Zrn	4.4201	0.1582	0.2957	0.0143		1716.11	154.60	1670.06	91.98	1772.97	77.48	1772.97	77.481	4.370	5.805		old	5.805
							1072140az_10_Zrn	undefined	undefined	undefined	undefined		undefined	undefined	undefined	undefined	undefined	undefined	undefined	undefined	#VALUE!	#VALUE!	#VALUE!	old	#VALUE!	#VALUE!	#VALUE!
							1072140az_11_Zrn	0.7514	0.0232	0.0887	0.0038		569.01	23.42	548.11	24.37	652.30	79.62	548.11	24.372	4.447	15.973		old	15.973
							1072140az_12_Zrn	0.1497	0.0046	0.0213	0.0009		141.64	4.63	136.07	5.68	240.82	83.95	136.07	5.678	4.173	43.497		young	0.000
							1072140az_13_Zrn	0.6844	0.0197	0.0854	0.0035		529.45	19.93	527.99	22.62	528.61	76.72	527.99	22.621	4.284	0.118		old	0.118
							1072140az_14_Zrn	1.6213	0.0449	0.1631	0.0067		978.51	45.07	974.18	43.14	994.13	69.27	974.18	43.136	4.428	2.007		old	2.007
							1072140az_15_Zrn	1.4875	0.0417	0.1531	0.0063		925.28	41.87	918.47	40.49	938.38	70.44	918.47	40.491	4.409	2.122		old	2.122
							1072140az_16_Zrn	0.1968	0.0056	0.0281	0.0012		182.38	5.66	178.81	7.47	201.63	80.38	178.81	7.470	4.177	11.318		young	0.000
							1072140az_17_Zrn	0.1094	0.0057	0.0142	0.0006		105.45	5.75	90.80	3.84	448.13	122.39	90.80	3.844	4.233	79.737		young	0.000
							1072140az_18_Zrn	1.6132	0.0454	0.1594	0.0065		975.37	45.59	953.32	42.10	1020.85	69.76	953.32	42.101	4.416	6.615		old	6.615
							1072140az_19_Zrn	0.0870	0.0035	0.0130	0.0005		84.70	3.58	83.06	3.54	127.52	106.79	83.06	3.538	4.260	34.863		young	0.000
							1072140az_20_Zrn	0.0890	0.0032	0.0131	0.0005		86.57	3.24	83.74	3.49	158.10	95.75	83.74	3.487	4.163	47.031		young	0.000
							1072140az_21_Zrn	0.2617	0.0075	0.0372	0.0015		236.02	7.56	235.23	9.89	246.47	79.88	235.23	9.889	4.204	4.557		young	0.000
							1072140az_22_Zrn	2.9282	0.1514	0.2299	0.0133		1389.23	148.18	1334.07	85.57	1474.75	108.41	1474.75	108.411	7.351	9.539		old	9.539
							1072140az_23_Zrn	2.4438	0.0688	0.2145	0.0088		1255.59	68.70	1252.88	56.74	1261.01	67.37	1261.01	67.369	5.342	0.645		old	0.645
							1072140az_24_Zrn	0.0679	0.0022	0.0097	0.0004		66.70	2.25	62.53	2.59	219.55	88.50	62.53	2.593	4.146	71.517		young	0.000
							1072140az_25_Zrn	1.4495	0.0403	0.1493	0.0061		909.67	40.55	896.80	39.52	941.40	70.10	896.80	39.516	4.406	4.737		old	4.737
							1072140az_26_Zrn	0.0793	0.0045	0.0114	0.0005		77.50	4.60	72.81	3.12	219.59	138.96	72.81	3.124	4.291	66.845		young	0.000
							1072140az_27_Zrn	0.1458	0.0045	0.0206	0.0008		138.18	4.52	131.16	5.45	258.93	83.67	131.16	5.451	4.156	49.345		young	0.000
							1072140az_28_Zrn	0.0966	0.0031	0.0136	0.0006		93.60	3.14	87.30	3.63	248.95	86.91	87.30	3.634	4.163	64.931		young	0.000
							1072140az_29_Zrn	0.8734	0.0247	0.1042	0.0043		637.42	24.94	639.17	27.64	624.95	74.57	639.17	27.643	4.325	-2.277		old	-2.277
							1072140az_30_Zrn	0.0948	0.0077	0.0124	0.0005		91.95	7.79	79.61	3.54	419.13	183.72	79.61	3.536	4.442	81.006		young	0.000
							1072140az_31_Zrn	0.2717	0.0079	0.0380	0.0016		244.03	8.05	240.55	10.14	269.50	81.14	240.55	10.140	4.215	10.744		young	0.000
							1072140az_32_Zrn	0.0989	0.0032	0.0139	0.0006		95.80	3.24	89.07	3.71	257.67	87.11	89.07	3.708	4.163	65.431		young	0.000
							1072140az_33_Zrn	0.8094	0.0239	0.0961	0.0040		602.09	24.09	591.76	25.46	629.17	76.56	591.76	25.462	4.303	5.946		old	5.946
							1072140az_34_Zrn	0.1068	0.0070	0.0153	0.0007		102.99	7.06	98.14	4.20	208.95	156.53	98.14	4.197	4.277	53.030		young	0.000
							1072140az_35_Zrn	0.0862	0.0031	0.0123	0.0005		84.00	3.11	79.11	3.29	217.05	94.09	79.11	3.290	4.159	63.554		young	0.000
							1072140az_36_Zrn	2.2199	0.0625	0.2030	0.0083		1187.34	62.45	1191.43	53.61	1180.95	68.09	1180.95	68.087	5.765	-0.888		old	-0.888
							1072140az_37_Zrn	0.5747	0.0160	0.0735	0.0030		461.08	16.21	456.97	19.49	482.63	75.62	456.97	19.492	4.266	5.317		old	5.317
							1072140az_38_Zrn	0.0776	0.0031	0.0114	0.0005		75.87	3.13	72.94	3.05	154.70	103.48	72.94	3.048	4.179	52.851		young	0.000
							1072140az_39_Zrn	0.3546	0.0100	0.0488	0.0020		308.20	10.15	307.31	12.93	318.08	78.51	307.31	12.933	4.208	3.384		old	3.384
							1072140az_40_Zrn	1.9544	0.0541	0.1835	0.0075		1099.94	54.23	1086.06	48.58	1126.68	67.95	1126.68	67.951	6.031	3.605		old	3.605
							1072140az_41_Zrn	0.2801	0.0097	0.0405	0.0017		250.74	9.79	256.02	10.88	198.35	92.41	256.02	10.881	4.250	-29.077		young	0.000
							1072140az_42_Zrn	1.0061	0.0282	0.1158	0.0048		706.90	28.42	706.14	30.76	709.84	73.03	706.14	30.759	4.356	0.522		old	0.522
							1072140az_43_Zrn	1.3396	0.0386	0.1441	0.0059		863.06	38.87	867.66	38.29	847.21	72.85	867.66	38.288	4.413	-2.413		old	-2.413
							1072140az_44_Zrn	0.0907	0.0027	0.0136	0.0006		88.13	2.77	86.95	3.66	118.13	85.07	86.95	3.656	4.204	26.394		young	0.000
							1072140az_45_Zrn	0.1007	0.0060	0.0140	0.0006		97.46	6.13	89.81	3.97	277.92	144.12	89.81	3.967	4.417	67.685		young	0.000
							1072140az_46_Zrn	4.7245	0.1314	0.3113	0.0128		1771.60	129.26	1747.32	82.56	1800.77	62.17	1800.77	62.168	3.452	2.968		old	2.968
							1072140az_47_Zrn	2.1112	0.0588	0.1911	0.0079		1152.46	58.82	1127.40	50.73	1205.10	67.38	1205.10	67.378	5.591	6.448		old	6.448
							1072140az_48_Zrn	0.1465	0.0077	0.0208	0.0009		138.82	7.78	132.96	5.70	242.70	128.31	132.96	5.696	4.284	45.218		young	0.000
							1072140az_49_Zrn	0.1001	0.0043	0.0138	0.0006		96.84	4.36	88.57	3.73	299.19	107.26	88.57	3.730	4.211	70.398		young	0.000
							1072140az_50_Zrn	2.3828	0.0666	0.2106	0.0087		1237.46	66.52	1231.83	55.86	1245.95	67.13	1245.95	67.130	5.388	1.133		old	1.133
							1072140az_51_Zrn	1.1413	0.0324	0.1239	0.0051		773.10	32.61	752.74	33.05	831.36	72.22	752.74	33.054	4.391	9.457		old	9.457
							1072140az_52_Zrn	0.8351	0.0233	0.0980	0.0040		616.41	23.55	602.51	26.06	663.62	73.32	602.51	26.064	4.326	9.209		old	9.209
							1072140az_53_Zrn	2.4681	0.0685	0.2184	0.0090		1262.74	68.35	1273.58	57.85	1243.35	66.77	1243.35	66.766	5.370	-2.432		old	-2.432
							1072140az_54_Zrn	0.7082	0.0198	0.0886	0.0037		543.65	20.03	547.31	23.52	526.83	75.17	547.31	23.520	4.297	-3.887		old	-3.887
							1072140az_55_Zrn	0.7135	0.0208	0.0876	0.0036		546.84	21.04	541.22	23.42	573.41	76.75	541.22	23.416	4.327	5.614		old	5.614
							1072140az_56_Zrn	0.1400	0.0044	0.0198	0.0008		133.05	4.46	126.41	5.27	243.20	85.39	126.41	5.270	4.169	48.024		young	0.000
							1072140az_57_Zrn	0.0732	0.0031	0.0101	0.0004		71.76	3.13	65.09	2.75	284.03	105.77	65.09	2.746	4.219	77.083		young	0.000
							1072140az_58_Zrn	0.7681	0.0216	0.0952	0.0039		578.69	21.85	586.09	25.27	548.75	75.23	586.09	25.274	4.312	-6.804		old	-6.804		disc. inv
							1072140az_59_Zrn	undefined	undefined	undefined	undefined		undefined	undefined	undefined	undefined	undefined	undefined	undefined	undefined	#VALUE!	#VALUE!	#VALUE!	old	#VALUE!	#VALUE!	#VALUE!
							1072140az_60_Zrn	1.5740	0.0439	0.1589	0.0065		960.00	44.09	950.47	42.12	978.45	69.72	950.47	42.119	4.431	2.860		old	2.860
							1072140az_61_Zrn	0.0890	0.0032	0.0126	0.0005		86.58	3.28	80.88	3.44	230.31	95.74	80.88	3.444	4.259	64.884		young	0.000
							1072140az_62_Zrn	3.4393	0.1111	0.2526	0.0111		1513.42	109.74	1451.72	71.52	1601.30	71.14	1601.30	71.139	4.443	9.341		old	9.341
							1072140az_63_Zrn	1.2456	0.0353	0.1353	0.0056		821.40	35.54	818.21	36.05	819.29	72.32	818.21	36.048	4.406	0.132		old	0.132
							1072140az_64_Zrn	undefined	undefined	undefined	undefined		undefined	undefined	undefined	undefined	undefined	undefined	undefined	undefined	#VALUE!	#VALUE!	#VALUE!	old	#VALUE!	#VALUE!	#VALUE!
							1072140az_65_Zrn	0.2540	0.0075	0.0367	0.0015		229.80	7.58	232.28	9.78	201.69	82.29	232.28	9.780	4.210	-15.169		young	0.000
							1072140az_66_Zrn	1.0758	0.0306	0.1192	0.0049		741.56	30.83	726.15	31.66	788.18	72.75	726.15	31.658	4.360	7.870		old	7.870
							1072140az_67_Zrn	0.5479	0.0162	0.0692	0.0029		443.60	16.34	431.12	18.37	505.67	78.14	431.12	18.370	4.261	14.743		old	14.743
							1072140az_68_Zrn	1.4514	0.0466	0.1486	0.0062		910.46	46.74	893.27	40.03	949.05	77.23	893.27	40.031	4.481	5.878		old	5.878
							1072140az_69_Zrn	10.5897	0.2939	0.4669	0.0192		2487.81	278.46	2470.01	123.40	2501.70	57.48	2501.70	57.485	2.298	1.267		old	1.267
							1072140az_70_Zrn	0.2073	0.0066	0.0295	0.0012		191.25	6.68	187.12	7.91	229.20	86.78	187.12	7.912	4.229	18.361		young	0.000
							1072140az_71_Zrn	0.2765	0.0079	0.0390	0.0016		247.91	8.02	246.80	10.38	250.96	80.03	246.80	10.379	4.205	1.659		young	0.000
							1072140az_72_Zrn	1.3573	0.0379	0.1448	0.0060		870.71	38.10	871.77	38.40	866.82	70.96	871.77	38.403	4.405	-0.570		old	-0.570
							1072140az_73_Zrn	0.0797	0.0024	0.0119	0.0005		77.87	2.46	76.11	3.18	127.33	85.50	76.11	3.184	4.183	40.224		young	0.000
							1072140az_74_Zrn	1.6933	0.0480	0.1639	0.0068		1006.01	48.18	978.68	43.48	1066.60	69.57	978.68	43.479	4.443	8.243		old	8.243
							1072140az_75_Zrn	6.5102	0.1819	0.3707	0.0153		2047.28	176.78	2032.90	98.06	2059.85	60.53	2059.85	60.526	2.938	1.308		old	1.308
							1072140az_76_Zrn	0.0824	0.0030	0.0117	0.0005		80.41	3.03	74.91	3.13	240.16	94.92	74.91	3.125	4.172	68.807		young	0.000
							1072140az_77_Zrn	0.1903	0.0055	0.0276	0.0011		176.88	5.57	175.58	7.35	194.23	81.54	175.58	7.348	4.185	9.602		young	0.000
							1072140az_78_Zrn	5.1512	0.1430	0.3297	0.0136		1844.60	140.22	1836.90	87.10	1852.72	61.70	1852.72	61.701	3.330	0.854		old	0.854
							1072140az_79_Zrn	0.1083	0.0054	0.0138	0.0006		104.37	5.51	88.66	3.77	469.08	118.74	88.66	3.767	4.249	81.099		young	0.000
							1072140az_80_Zrn	0.3986	0.0146	0.0514	0.0021		340.61	14.76	323.42	13.79	435.37	92.59	323.42	13.795	4.265	25.715		old	25.715	disc
							1072140az_81_Zrn	0.1158	0.0082	0.0167	0.0007		111.22	8.28	106.79	4.66	195.06	168.00	106.79	4.657	4.361	45.255		young	0.000
							1072140az_82_Zrn	0.4171	0.0116	0.0555	0.0023		353.98	11.75	348.48	14.75	388.89	76.67	348.48	14.746	4.232	10.390		old	10.390
							1072140az_83_Zrn	1.7687	0.0496	0.1707	0.0070		1034.04	49.77	1015.88	45.27	1067.41	69.08	1067.41	69.080	6.472	4.828		old	4.828
							1072140az_84_Zrn	0.5823	0.0166	0.0737	0.0030		465.94	16.76	458.64	19.63	499.90	76.44	458.64	19.629	4.280	8.253		old	8.253
							1072140az_85_Zrn	0.2630	0.0076	0.0370	0.0015		237.05	7.75	234.10	9.83	267.02	80.72	234.10	9.826	4.197	12.326		young	0.000
							1072140az_86_Zrn	0.2826	0.0081	0.0393	0.0016		252.72	8.22	248.75	10.48	286.03	79.78	248.75	10.482	4.214	13.036		young	0.000
							1072140az_87_Zrn	0.0921	0.0035	0.0127	0.0005		89.44	3.59	81.44	3.45	299.15	98.49	81.44	3.448	4.234	72.776		young	0.000
							1072140az_88_Zrn	0.0993	0.0038	0.0137	0.0006		96.14	3.84	87.89	3.77	288.07	97.94	87.89	3.770	4.290	69.490		young	0.000
							1072140az_89_Zrn	0.2712	0.0077	0.0389	0.0016		243.62	7.83	245.79	10.37	223.39	80.19	245.79	10.371	4.219	-10.028		young	0.000
							1072140az_90_Zrn	0.2641	0.0085	0.0362	0.0015		237.96	8.58	228.94	9.72	323.03	85.53	228.94	9.716	4.244	29.128		young	0.000
							1072140az_91_Zrn	undefined	undefined	undefined	undefined		undefined	undefined	undefined	undefined	undefined	undefined	undefined	undefined	#VALUE!	#VALUE!	#VALUE!	old	#VALUE!	#VALUE!	#VALUE!
							1072140az_92_Zrn	3.2975	0.1004	0.2491	0.0106		1480.46	99.47	1433.63	67.89	1551.82	68.25	1551.82	68.246	4.398	7.616		old	7.616
							1072140az_93_Zrn	0.7160	0.0210	0.0878	0.0036		548.30	21.23	542.29	23.28	568.55	77.16	542.29	23.277	4.292	4.618		old	4.618
							1072140az_94_Zrn	0.0916	0.0034	0.0131	0.0005		88.99	3.42	83.87	3.50	219.81	96.71	83.87	3.504	4.178	61.846		young	0.000
							1072140az_95_Zrn	0.2480	0.0073	0.0358	0.0015		224.92	7.36	226.63	9.50	200.29	82.20	226.63	9.496	4.190	-13.152		young	0.000
							1072140az_96_Zrn	0.1373	0.0042	0.0197	0.0008		130.62	4.27	125.94	5.24	209.57	84.63	125.94	5.244	4.164	39.903		young	0.000
							1072140az_97_Zrn	1.6440	0.0460	0.1650	0.0068		987.24	46.20	984.70	43.66	991.02	69.83	984.70	43.664	4.434	0.638		old	0.638
							1072140az_98_Zrn	0.3062	0.0091	0.0425	0.0017		271.21	9.27	268.29	11.27	289.70	81.91	268.29	11.272	4.201	7.389		young	0.000
							1072140az_99_Zrn	0.1533	0.0054	0.0214	0.0009		144.78	5.47	136.59	5.71	282.20	92.40	136.59	5.713	4.182	51.598		young	0.000
							1072140az_100_Zrn	1.6032	0.0454	0.1564	0.0065		971.47	45.60	936.98	41.58	1047.73	69.93	936.98	41.584	4.438	10.570		old	10.570
							1072140az_101_Zrn	1.5084	0.0417	0.1557	0.0064		933.77	41.87	932.67	41.11	935.32	69.77	932.67	41.108	4.408	0.283		old	0.283
							1072140az_102_Zrn	2.3057	0.0637	0.2042	0.0084		1214.03	63.65	1198.00	54.02	1243.66	66.70	1243.66	66.705	5.364	3.671		old	3.671
							1072140az_103_Zrn	2.9951	0.1351	0.2336	0.0140		1406.39	132.73	1353.57	89.65	1487.34	99.91	1487.34	99.911	6.717	8.994		old	8.994
							1072140az_104_Zrn	0.0946	0.0028	0.0138	0.0006		91.82	2.81	88.21	3.66	175.25	82.61	88.21	3.658	4.147	49.668		young	0.000
							1072140az_105_Zrn	0.1789	0.0055	0.0254	0.0010		167.14	5.53	161.59	6.75	240.20	83.88	161.59	6.755	4.180	32.729		young	0.000
							1072140az_106_Zrn	0.5752	0.0183	0.0732	0.0030		461.36	18.53	455.45	19.48	484.80	82.89	455.45	19.484	4.278	6.055		old	6.055
							1072140az_107_Zrn	0.2814	0.0080	0.0402	0.0017		251.74	8.12	254.02	10.69	226.89	80.03	254.02	10.691	4.209	-11.955		young	0.000
							1072140az_108_Zrn	0.6473	0.0189	0.0821	0.0034		506.80	19.10	508.83	21.78	492.38	77.84	508.83	21.784	4.281	-3.340		old	-3.340
							1072140az_109_Zrn	1.6604	0.0472	0.1653	0.0068		993.53	47.37	986.14	43.84	1008.09	70.40	986.14	43.843	4.446	2.178		old	2.178
							1072140az_110_Zrn	0.0900	0.0031	0.0127	0.0005		87.51	3.19	81.52	3.39	246.04	92.50	81.52	3.393	4.163	66.869		young	0.000
35	U31	38	US-1002	1072-141	4.5213100	-74.1491180																						992431	991404	0.0000	0.0000		102	28	0	0	Cacho	Early Paleocene		Early Paleocene	Early Paleocene	Early Paleocene	27	27	This work
							1072141az_1_Zrn	0.3190	0.0095	0.0433	0.0018		281.16	9.61	272.98	11.46	333.52	81.04	272.98	11.457	4.197	18.152		young	0.000
							1072141az_2_Zrn	0.1565	0.0063	0.0219	0.0009		147.65	6.43	139.69	5.88	264.16	103.56	139.69	5.884	4.212	47.116		young	0.000
							1072141az_3_Zrn	2.0630	0.0573	0.1943	0.0080		1136.60	57.41	1144.76	51.43	1120.51	68.18	1120.51	68.179	6.085	-2.164		old	-2.164
							1072141az_4_Zrn	0.0814	0.0025	0.0117	0.0005		79.44	2.59	74.88	3.10	209.64	85.87	74.88	3.102	4.143	64.283		young	0.000
							1072141az_5_Zrn	0.0886	0.0029	0.0129	0.0005		86.16	2.89	82.59	3.53	182.59	88.49	82.59	3.532	4.277	54.766		young	0.000
							1072141az_6_Zrn	0.0979	0.0038	0.0140	0.0006		94.82	3.89	89.38	3.79	230.63	101.47	89.38	3.791	4.241	61.245		young	0.000
							1072141az_7_Zrn	0.1060	0.0056	0.0131	0.0006		102.29	5.65	84.12	3.57	539.01	121.88	84.12	3.566	4.240	84.394		young	0.000
							1072141az_8_Zrn	1.4937	0.0412	0.1537	0.0063		927.83	41.41	921.48	40.60	942.36	69.67	921.48	40.602	4.406	2.216		old	2.216
							1072141az_9_Zrn	0.1822	0.0058	0.0256	0.0011		169.92	5.92	162.90	6.83	257.86	86.67	162.90	6.830	4.192	36.827		young	0.000
							1072141az_10_Zrn	0.1675	0.0050	0.0241	0.0010		157.27	5.09	153.37	6.39	205.95	83.40	153.37	6.392	4.168	25.529		young	0.000
							1072141az_11_Zrn	undefined	undefined	undefined	undefined		undefined	undefined	undefined	undefined	undefined	undefined	undefined	undefined	#VALUE!	#VALUE!	#VALUE!	old	#VALUE!	#VALUE!	#VALUE!
							1072141az_12_Zrn	2.1256	0.0584	0.1951	0.0080		1157.16	58.49	1149.06	51.49	1172.31	67.14	1172.31	67.145	5.728	1.984		old	1.984
							1072141az_13_Zrn	2.7109	0.0798	0.2247	0.0093		1331.44	79.45	1306.87	59.71	1369.11	68.45	1369.11	68.451	5.000	4.546		old	4.546
							1072141az_14_Zrn	1.8610	0.0536	0.1796	0.0074		1067.34	53.73	1065.02	47.62	1070.42	70.41	1070.42	70.412	6.578	0.505		old	0.505
							1072141az_15_Zrn	0.6374	0.0181	0.0811	0.0033		500.67	18.29	502.43	21.54	488.26	76.54	502.43	21.540	4.287	-2.903		old	-2.903
							1072141az_16_Zrn	0.1267	0.0337	0.0151	0.0012		121.16	33.89	96.84	7.57	629.59	536.63	96.84	7.575	7.821	84.618		young	0.000
							1072141az_17_Zrn	0.2561	0.0074	0.0364	0.0015		231.51	7.45	230.60	9.65	235.27	80.54	230.60	9.649	4.184	1.985		young	0.000
							1072141az_18_Zrn	0.1768	0.0059	0.0250	0.0010		165.26	5.96	158.88	6.66	249.98	89.01	158.88	6.660	4.192	36.441		young	0.000
							1072141az_19_Zrn	0.0839	0.0026	0.0123	0.0005		81.79	2.59	78.84	3.27	159.35	85.00	78.84	3.266	4.143	50.524		young	0.000
							1072141az_20_Zrn	0.5098	0.0150	0.0640	0.0026		418.30	15.13	400.02	17.03	502.15	77.14	400.02	17.029	4.257	20.339		old	20.339
							1072141az_21_Zrn	0.2545	0.0075	0.0361	0.0015		230.23	7.57	228.32	9.55	237.37	81.66	228.32	9.545	4.181	3.812		young	0.000
							1072141az_22_Zrn	2.1693	0.0601	0.1992	0.0082		1171.27	60.08	1171.15	52.65	1170.57	67.50	1170.57	67.502	5.767	-0.049		old	-0.049
							1072141az_23_Zrn	0.6028	0.0178	0.0756	0.0031		479.01	18.00	469.63	20.02	517.24	78.18	469.63	20.024	4.264	9.204		old	9.204
							1072141az_24_Zrn	0.1895	0.0092	0.0250	0.0011		176.24	9.28	159.26	6.84	410.14	116.55	159.26	6.835	4.292	61.168		young	0.000
							1072141az_25_Zrn	0.1584	0.0064	0.0212	0.0009		149.27	6.46	135.12	5.72	373.43	100.89	135.12	5.717	4.231	63.816		young	0.000
							1072141az_26_Zrn	0.3702	0.0137	0.0497	0.0021		319.78	13.91	312.84	13.28	363.19	94.80	312.84	13.284	4.246	13.864		old	13.864
							1072141az_27_Zrn	0.0975	0.0031	0.0142	0.0006		94.42	3.16	90.92	3.82	182.64	87.74	90.92	3.817	4.198	50.219		young	0.000
							1072141az_28_Zrn	undefined	undefined	undefined	undefined		undefined	undefined	undefined	undefined	undefined	undefined	undefined	undefined	#VALUE!	#VALUE!	#VALUE!	old	#VALUE!	#VALUE!	#VALUE!
							1072141az_29_Zrn	1.6806	0.0478	0.1700	0.0070		1001.23	48.01	1012.15	45.02	973.90	70.82	973.90	70.820	7.272	-3.928		old	-3.928
							1072141az_30_Zrn	0.0934	0.0033	0.0130	0.0005		90.67	3.31	83.41	3.48	280.45	91.86	83.41	3.479	4.171	70.260		young	0.000
							1072141az_31_Zrn	0.1901	0.0068	0.0256	0.0011		176.68	6.92	162.73	6.83	361.98	92.41	162.73	6.831	4.198	55.045		young	0.000
							1072141az_32_Zrn	1.2823	0.0353	0.1374	0.0056		837.86	35.53	829.99	36.36	858.15	70.52	829.99	36.364	4.381	3.282		old	3.282
							1072141az_33_Zrn	0.0793	0.0035	0.0111	0.0005		77.48	3.58	70.86	2.98	279.83	111.56	70.86	2.981	4.207	74.678		young	0.000
							1072141az_34_Zrn	0.1366	0.0085	0.0185	0.0008		129.97	8.59	118.34	5.13	349.67	145.13	118.34	5.134	4.338	66.155		young	0.000
							1072141az_35_Zrn	2.1029	0.0586	0.1935	0.0079		1149.74	58.68	1140.19	51.07	1161.69	67.87	1161.69	67.873	5.843	1.850		old	1.850
							1072141az_36_Zrn	0.3084	0.0092	0.0424	0.0017		272.92	9.29	267.90	11.26	311.11	81.36	267.90	11.261	4.203	13.891		young	0.000
							1072141az_37_Zrn	0.2257	0.0147	0.0277	0.0012		206.68	14.86	176.25	7.60	545.68	147.67	176.25	7.599	4.311	67.700		young	0.000
							1072141az_38_Zrn	0.0835	0.0032	0.0115	0.0005		81.46	3.24	73.47	3.06	311.15	97.94	73.47	3.059	4.164	76.387		young	0.000
							1072141az_39_Zrn	2.1299	0.0626	0.1980	0.0081		1158.54	62.58	1164.47	52.41	1138.31	70.63	1138.31	70.630	6.205	-2.299		old	-2.299
							1072141az_40_Zrn	0.0955	0.0042	0.0138	0.0006		92.57	4.25	88.51	3.71	194.90	111.53	88.51	3.710	4.192	54.589		young	0.000
							1072141az_41_Zrn	1.7856	0.0501	0.1726	0.0071		1040.23	50.24	1026.17	45.71	1061.40	69.26	1061.40	69.261	6.525	3.319		old	3.319
							1072141az_42_Zrn	0.8003	0.0228	0.0957	0.0039		596.99	23.01	588.89	25.40	624.88	74.93	588.89	25.404	4.314	5.760		old	5.760
							1072141az_43_Zrn	0.1669	0.0049	0.0242	0.0010		156.76	4.98	153.87	6.44	199.98	82.48	153.87	6.440	4.185	23.058		young	0.000
							1072141az_44_Zrn	0.0914	0.0030	0.0133	0.0006		88.82	3.02	85.27	3.55	175.14	88.97	85.27	3.555	4.169	51.315		young	0.000
							1072141az_45_Zrn	0.1689	0.0085	0.0233	0.0010		158.48	8.56	148.19	6.29	316.42	121.61	148.19	6.292	4.246	53.169		young	0.000
							1072141az_46_Zrn	0.0974	0.0049	0.0126	0.0005		94.34	4.95	81.01	3.45	439.71	119.89	81.01	3.454	4.263	81.577		young	0.000
							1072141az_47_Zrn	0.1568	0.0105	0.0224	0.0010		147.93	10.64	143.08	6.17	211.31	159.43	143.08	6.169	4.311	32.290		young	0.000
							1072141az_48_Zrn	undefined	undefined	undefined	undefined		undefined	undefined	undefined	undefined	undefined	undefined	undefined	undefined	#VALUE!	#VALUE!	#VALUE!	old	#VALUE!	#VALUE!	#VALUE!
							1072141az_49_Zrn	0.5955	0.0168	0.0766	0.0031		474.35	16.97	475.84	20.23	462.98	76.34	475.84	20.227	4.251	-2.777		old	-2.777
							1072141az_50_Zrn	0.1573	0.0061	0.0230	0.0010		148.31	6.14	146.59	6.21	153.65	101.44	146.59	6.206	4.234	4.596		young	0.000
							1072141az_51_Zrn	0.1743	0.0056	0.0250	0.0010		163.15	5.67	159.23	6.68	218.97	87.25	159.23	6.677	4.193	27.281		young	0.000
							1072141az_52_Zrn	3.4316	0.0949	0.2601	0.0107		1511.66	94.13	1490.36	68.91	1549.39	64.01	1549.39	64.011	4.131	3.810		old	3.810
							1072141az_53_Zrn	0.1917	0.0084	0.0247	0.0010		178.05	8.51	157.10	6.69	423.83	107.27	157.10	6.685	4.255	62.934		young	0.000
							1072141az_54_Zrn	1.7875	0.0493	0.1757	0.0072		1040.93	49.43	1043.63	46.45	1034.52	68.67	1034.52	68.675	6.638	-0.880		old	-0.880
							1072141az_55_Zrn	0.8493	0.0238	0.1004	0.0041		624.25	24.06	616.63	26.64	645.96	73.87	616.63	26.640	4.320	4.541		old	4.541
							1072141az_56_Zrn	0.2919	0.0083	0.0421	0.0017		260.05	8.38	265.74	11.15	209.59	80.14	265.74	11.151	4.196	-26.788		young	0.000
							1072141az_57_Zrn	0.3263	0.0106	0.0436	0.0018		286.75	10.72	275.03	11.61	378.02	85.50	275.03	11.614	4.223	27.243		young	0.000
							1072141az_58_Zrn	0.0873	0.0026	0.0128	0.0005		84.95	2.62	82.00	3.41	165.30	83.34	82.00	3.410	4.159	50.395		young	0.000
							1072141az_59_Zrn	0.5668	0.0158	0.0733	0.0030		455.97	15.98	455.80	19.42	454.67	75.94	455.80	19.420	4.261	-0.249		old	-0.249
							1072141az_60_Zrn	0.3454	0.0105	0.0486	0.0020		301.27	10.61	305.86	12.91	259.18	83.22	305.86	12.907	4.220	-18.011		old	-18.011		disc. inv
							1072141az_61_Zrn	0.3042	0.0086	0.0430	0.0018		269.69	8.75	271.55	11.42	250.44	79.67	271.55	11.415	4.204	-8.432		young	0.000
							1072141az_62_Zrn	0.1019	0.0044	0.0142	0.0006		98.55	4.48	91.15	3.90	256.29	109.66	91.15	3.896	4.274	64.433		young	0.000
							1072141az_63_Zrn	0.5381	0.0165	0.0662	0.0027		437.17	16.67	413.02	17.65	563.77	79.60	413.02	17.647	4.273	26.740		old	26.740	disc
							1072141az_64_Zrn	0.8276	0.0234	0.1002	0.0041		612.26	23.67	615.46	26.54	599.20	74.87	615.46	26.536	4.312	-2.714		old	-2.714
							1072141az_65_Zrn	0.1730	0.0054	0.0245	0.0010		162.03	5.45	155.86	6.52	252.88	84.74	155.86	6.516	4.181	38.367		young	0.000
							1072141az_66_Zrn	24.0135	0.6621	0.6456	0.0265		3268.94	580.77	3210.95	170.00	3304.74	53.35	3304.74	53.346	1.614	2.838		old	2.838
							1072141az_67_Zrn	0.7014	0.0200	0.0860	0.0035		539.65	20.16	531.74	22.83	571.29	75.43	531.74	22.830	4.294	6.923		old	6.923
							1072141az_68_Zrn	0.2035	0.0063	0.0291	0.0012		188.11	6.37	184.77	7.73	226.33	84.79	184.77	7.735	4.186	18.361		young	0.000
							1072141az_69_Zrn	0.8789	0.0246	0.1047	0.0043		640.41	24.78	641.86	27.77	632.45	73.75	641.86	27.771	4.327	-1.487		old	-1.487
							1072141az_70_Zrn	0.2859	0.0085	0.0399	0.0016		255.31	8.58	251.98	10.59	276.98	81.56	251.98	10.592	4.203	9.025		young	0.000
							1072141az_71_Zrn	0.2028	0.0062	0.0288	0.0012		187.45	6.29	182.90	7.70	233.90	84.28	182.90	7.697	4.208	21.803		young	0.000
							1072141az_72_Zrn	0.2717	0.0076	0.0381	0.0016		244.06	7.74	241.24	10.11	270.75	78.89	241.24	10.112	4.192	10.899		young	0.000
							1072141az_73_Zrn	0.0814	0.0050	0.0115	0.0005		79.42	5.04	73.80	3.24	248.08	146.70	73.80	3.242	4.393	70.252		young	0.000
							1072141az_74_Zrn	0.1734	0.0051	0.0245	0.0010		162.35	5.16	155.97	6.49	246.65	81.58	155.97	6.487	4.159	36.762		young	0.000
							1072141az_75_Zrn	0.0777	0.0026	0.0110	0.0005		76.02	2.68	70.61	2.93	238.08	90.60	70.61	2.935	4.156	70.341		young	0.000
							1072141az_76_Zrn	0.5832	0.0165	0.0746	0.0031		466.53	16.64	464.04	19.81	476.30	76.31	464.04	19.815	4.270	2.575		old	2.575
							1072141az_77_Zrn	2.0417	0.0565	0.1885	0.0078		1129.55	56.53	1113.42	49.88	1161.98	67.52	1161.98	67.519	5.811	4.179		old	4.179
							1072141az_78_Zrn	0.6580	0.0182	0.0824	0.0034		513.39	18.39	510.50	21.81	533.59	74.46	510.50	21.810	4.272	4.329		old	4.329
							1072141az_79_Zrn	0.7054	0.0197	0.0861	0.0035		542.01	19.88	532.43	22.77	577.87	74.37	532.43	22.775	4.277	7.863		old	7.863
							1072141az_80_Zrn	0.1005	0.0036	0.0147	0.0006		97.20	3.64	94.14	4.00	171.53	95.29	94.14	4.005	4.254	45.120		young	0.000
							1072141az_81_Zrn	0.5469	0.0156	0.0716	0.0030		442.95	15.82	445.67	19.06	425.80	77.72	445.67	19.058	4.276	-4.667		old	-4.667
							1072141az_82_Zrn	4.9190	0.1364	0.3198	0.0132		1805.51	133.98	1788.92	84.60	1822.19	61.93	1822.19	61.929	3.399	1.826		old	1.826
							1072141az_83_Zrn	0.1702	0.0066	0.0242	0.0010		159.58	6.70	154.00	6.48	233.86	100.26	154.00	6.482	4.209	34.149		young	0.000
							1072141az_84_Zrn	3.1935	0.0884	0.2529	0.0104		1455.58	87.85	1453.63	66.86	1457.89	64.86	1457.89	64.862	4.449	0.292		old	0.292
							1072141az_85_Zrn	1.3158	0.0372	0.1405	0.0058		852.68	37.41	847.57	37.15	864.76	71.59	847.57	37.154	4.384	1.988		old	1.988
							1072141az_86_Zrn	0.6438	0.0179	0.0811	0.0033		504.67	18.09	502.95	21.53	504.32	75.21	502.95	21.532	4.281	0.270		old	0.270
							1072141az_87_Zrn	0.1532	0.0073	0.0194	0.0008		144.74	7.38	123.95	5.22	503.25	112.29	123.95	5.215	4.207	75.370		young	0.000
							1072141az_88_Zrn	5.6880	0.1571	0.3429	0.0141		1929.54	153.52	1900.73	90.71	1962.49	60.77	1962.49	60.770	3.097	3.147		old	3.147
							1072141az_89_Zrn	0.1708	0.0051	0.0239	0.0010		160.14	5.18	151.99	6.35	280.35	82.26	151.99	6.353	4.180	45.787		young	0.000
							1072141az_90_Zrn	0.4140	0.0118	0.0563	0.0023		351.73	11.94	352.99	15.00	354.39	78.48	352.99	15.003	4.250	0.397		old	0.397
							1072141az_91_Zrn	0.6731	0.0191	0.0828	0.0034		522.58	19.35	512.98	21.98	565.46	75.49	512.98	21.983	4.285	9.282		old	9.282
							1072141az_92_Zrn	0.5608	0.0157	0.0728	0.0030		452.05	15.86	453.22	19.30	442.29	76.26	453.22	19.297	4.258	-2.471		old	-2.471
							1072141az_93_Zrn	2.3558	0.0655	0.2073	0.0085		1229.33	65.45	1214.39	54.84	1241.94	67.01	1241.94	67.007	5.395	2.218		old	2.218
							1072141az_94_Zrn	0.5748	0.0164	0.0750	0.0031		461.11	16.57	466.44	19.87	425.88	77.45	466.44	19.868	4.259	-9.524		old	-9.524		disc. inv
							1072141az_95_Zrn	0.1671	0.0050	0.0240	0.0010		156.89	5.11	153.04	6.43	213.06	83.82	153.04	6.428	4.200	28.173		young	0.000
							1072141az_96_Zrn	0.1730	0.0054	0.0250	0.0010		162.03	5.45	159.43	6.72	191.88	85.85	159.43	6.716	4.212	16.912		young	0.000
							1072141az_97_Zrn	0.1009	0.0045	0.0134	0.0006		97.61	4.53	85.86	3.79	387.29	109.43	85.86	3.788	4.412	77.830		young	0.000
							1072141az_98_Zrn	undefined	undefined	undefined	undefined		undefined	undefined	undefined	undefined	undefined	undefined	undefined	undefined	#VALUE!	#VALUE!	#VALUE!	old	#VALUE!	#VALUE!	#VALUE!
							1072141az_99_Zrn	0.1789	0.0153	0.0255	0.0014		167.11	15.49	162.22	9.18	221.42	204.42	162.22	9.179	5.658	26.737		young	0.000
							1072141az_100_Zrn	0.1855	0.0053	0.0269	0.0011		172.75	5.36	170.93	7.15	196.72	80.80	170.93	7.147	4.181	13.108		young	0.000
							1072141az_101_Zrn	5.5054	0.1515	0.3423	0.0140		1901.44	148.32	1897.57	90.21	1903.49	61.02	1903.49	61.022	3.206	0.311		old	0.311
							1072141az_102_Zrn	3.9249	0.1083	0.2801	0.0115		1618.83	107.09	1591.99	73.98	1656.33	63.01	1656.33	63.008	3.804	3.884		old	3.884
							1072141az_103_Zrn	2.9912	0.0827	0.2390	0.0099		1405.39	82.27	1381.32	63.47	1443.83	65.00	1443.83	64.998	4.502	4.329		old	4.329
							1072141az_104_Zrn	0.6324	0.0181	0.0814	0.0033		497.57	18.26	504.62	21.55	464.70	77.05	504.62	21.549	4.270	-8.591		old	-8.591		disc. inv
							1072141az_105_Zrn	0.1005	0.0034	0.0140	0.0006		97.26	3.44	89.59	3.74	281.31	89.59	89.59	3.735	4.169	68.152		young	0.000
							1072141az_106_Zrn	0.1879	0.0066	0.0253	0.0010		174.87	6.71	161.23	6.76	341.44	91.57	161.23	6.758	4.192	52.779		young	0.000
							1072141az_107_Zrn	0.2949	0.0089	0.0400	0.0016		262.42	9.00	252.58	10.59	338.98	81.70	252.58	10.590	4.193	25.489		young	0.000
							1072141az_108_Zrn	3.2296	0.0901	0.2499	0.0103		1464.29	89.44	1437.74	65.94	1499.01	64.81	1499.01	64.810	4.324	4.087		old	4.087
							1072141az_109_Zrn	0.0843	0.0025	0.0125	0.0005		82.17	2.50	80.36	3.33	132.35	82.99	80.36	3.334	4.149	39.288		young	0.000
							1072141az_110_Zrn	1.0585	0.0301	0.1203	0.0050		733.07	30.29	732.35	31.92	757.65	72.94	732.35	31.924	4.359	3.339		old	3.339
36	U32	43	PES-1002	1072-146	5.6030240	-73.0071180																						1118979	1111133	0.0000	0.0000		108	1	0	0	Socha Inferior	Early Paleocene		Early Paleocene?	Early- Middle Paleocene	Early- Middle Paleocene	1	1	This work
							1072146az1_1_Zrn	1.5931	0.0453	0.1592	0.0060		967.51	45.49	952.30	38.87	994.40	69.11	952.297	38.874	4.082	4.234		old	4.234
							1072146az1_2_Zrn	4.8937	0.1233	0.3194	0.0120		1801.18	121.50	1786.63	77.40	1818.05	56.81	1818.048	56.807	3.125	1.728		old	1.728
							1072146az1_3_Zrn	3.2773	0.0822	0.2583	0.0097		1475.68	81.81	1481.01	62.46	1466.19	59.22	1466.193	59.215	4.039	-1.011		old	-1.011
							1072146az1_4_Zrn	3.7199	0.0939	0.2732	0.0103		1575.65	93.21	1556.83	66.24	1604.20	58.45	1604.196	58.449	3.644	2.953		old	2.953
							1072146az1_5_Zrn	5.0908	0.1351	0.3197	0.0125		1834.57	132.75	1788.07	80.03	1879.67	58.83	1879.671	58.827	3.130	4.873		old	4.873
							1072146az1_6_Zrn	4.7506	0.1205	0.3144	0.0119		1776.21	118.79	1762.45	76.21	1793.60	57.25	1793.605	57.246	3.192	1.737		old	1.737
							1072146az1_7_Zrn	2.6405	0.0664	0.2224	0.0084		1312.00	66.34	1294.44	53.85	1341.51	60.36	1341.514	60.363	4.500	3.509		old	3.509
							1072146az1_8_Zrn	3.3298	0.0833	0.2564	0.0097		1488.07	82.90	1471.64	62.07	1511.80	58.78	1511.795	58.780	3.888	2.656		old	2.656
							1072146az1_9_Zrn	5.0284	0.1321	0.3186	0.0120		1824.11	129.91	1782.93	77.44	1869.44	58.08	1869.439	58.082	3.107	4.627		old	4.627
							1072146az1_10_Zrn	1.9299	0.0515	0.1812	0.0068		1091.52	51.66	1073.32	44.05	1117.29	64.87	1117.287	64.866	5.806	3.935		old	3.935
							1072146az1_11_Zrn	undefined	undefined	undefined	undefined		undefined	undefined	undefined	undefined	undefined	undefined	undefined	undefined	#VALUE!	#VALUE!	#VALUE!	old	#VALUE!	#VALUE!	#VALUE!
							1072146az1_12_Zrn	2.5305	0.0639	0.2168	0.0082		1280.83	63.86	1264.80	52.51	1307.73	60.80	1307.731	60.798	4.649	3.283		old	3.283
							1072146az1_13_Zrn	4.0401	0.1016	0.2865	0.0108		1642.30	100.61	1624.14	69.36	1666.62	57.80	1666.622	57.801	3.468	2.549		old	2.549
							1072146az1_14_Zrn	2.3847	0.0602	0.2119	0.0080		1238.03	60.18	1238.80	51.33	1233.27	61.39	1233.274	61.390	4.978	-0.448		old	-0.448
							1072146az1_15_Zrn	4.4592	0.1119	0.3036	0.0114		1723.41	110.55	1709.05	73.43	1739.51	57.18	1739.513	57.184	3.287	1.751		old	1.751
							1072146az1_16_Zrn	3.4235	0.0860	0.2611	0.0098		1509.79	85.48	1495.38	63.23	1530.21	58.78	1530.210	58.781	3.841	2.276		old	2.276
							1072146az1_17_Zrn	4.5080	0.1130	0.3058	0.0115		1732.45	111.66	1720.11	74.06	1745.30	57.14	1745.297	57.145	3.274	1.443		old	1.443
							1072146az1_18_Zrn	3.2755	0.0835	0.2586	0.0097		1475.25	83.10	1482.69	62.62	1465.96	59.87	1465.955	59.873	4.084	-1.142		old	-1.142
							1072146az1_19_Zrn	5.6534	0.1418	0.3434	0.0129		1924.28	139.14	1903.02	83.04	1946.56	55.78	1946.565	55.781	2.866	2.237		old	2.237
							1072146az1_20_Zrn	2.5174	0.0632	0.2165	0.0081		1277.07	63.18	1263.34	52.40	1299.85	60.60	1299.850	60.603	4.662	2.809		old	2.809
							1072146az1_21_Zrn	3.3450	0.0845	0.2592	0.0098		1491.62	83.99	1485.79	62.77	1499.49	59.22	1499.491	59.221	3.949	0.914		old	0.914
							1072146az1_22_Zrn	2.0801	0.0556	0.1951	0.0074		1142.28	55.69	1148.85	47.56	1128.89	64.89	1128.887	64.895	5.749	-1.769		old	-1.769
							1072146az1_23_Zrn	2.4690	0.0626	0.2145	0.0081		1263.00	62.60	1252.70	52.19	1282.05	61.27	1282.050	61.268	4.779	2.289		old	2.289
							1072146az1_24_Zrn	3.3272	0.0853	0.2561	0.0097		1487.46	84.82	1469.79	62.07	1513.26	59.72	1513.261	59.724	3.947	2.872		old	2.872
							1072146az1_25_Zrn	4.6398	0.1162	0.3107	0.0117		1756.46	114.68	1744.27	75.11	1771.27	56.87	1771.268	56.871	3.211	1.524		old	1.524
							1072146az1_26_Zrn	3.0164	0.0772	0.2438	0.0092		1411.78	76.96	1406.66	59.08	1414.91	60.44	1414.915	60.443	4.272	0.584		old	0.584
							1072146az1_27_Zrn	3.3130	0.0841	0.2583	0.0097		1484.11	83.69	1481.26	62.60	1490.44	59.53	1490.440	59.533	3.994	0.616		old	0.616
							1072146az1_28_Zrn	0.2932	0.0088	0.0414	0.0016		261.09	8.94	261.37	10.08	247.68	81.29	261.369	10.080	3.857	-5.527		young	0.000
							1072146az1_29_Zrn	2.6158	0.0659	0.2222	0.0084		1305.08	65.86	1293.49	53.82	1321.60	60.61	1321.604	60.605	4.586	2.127		old	2.127
							1072146az1_30_Zrn	3.5803	0.0908	0.2667	0.0101		1545.18	90.20	1524.16	64.71	1576.91	58.74	1576.912	58.745	3.725	3.345		old	3.345
							1072146az1_31_Zrn	1.2708	0.0327	0.1380	0.0052		832.77	32.95	833.56	33.47	830.13	66.09	833.558	33.469	4.015	-0.413		old	-0.413
							1072146az1_32_Zrn	4.4756	0.1168	0.3065	0.0116		1726.47	115.29	1723.55	74.48	1731.14	58.84	1731.143	58.837	3.399	0.438		old	0.438
							1072146az1_33_Zrn	3.2604	0.0821	0.2574	0.0097		1471.65	81.66	1476.53	62.28	1463.81	59.36	1463.806	59.360	4.055	-0.869		old	-0.869
							1072146az1_34_Zrn	3.2160	0.0807	0.2524	0.0095		1461.03	80.37	1451.01	61.07	1474.16	59.17	1474.159	59.165	4.013	1.570		old	1.570
							1072146az1_35_Zrn	4.5558	0.1155	0.3066	0.0116		1741.22	114.01	1723.80	74.40	1762.26	57.40	1762.256	57.402	3.257	2.182		old	2.182
							1072146az1_36_Zrn	3.1964	0.0809	0.2534	0.0095		1456.30	80.48	1456.05	61.35	1453.97	59.66	1453.967	59.656	4.103	-0.143		old	-0.143
							1072146az1_37_Zrn	4.9409	0.1249	0.3194	0.0121		1809.27	122.99	1786.82	77.45	1835.15	56.75	1835.146	56.751	3.092	2.633		old	2.633
							1072146az1_38_Zrn	3.4929	0.0881	0.2645	0.0100		1525.61	87.59	1512.89	64.10	1541.22	58.83	1541.221	58.829	3.817	1.838		old	1.838
							1072146az1_39_Zrn	4.6694	0.1187	0.3118	0.0118		1761.77	117.08	1749.76	75.65	1774.64	57.41	1774.642	57.415	3.235	1.402		old	1.402
							1072146az1_40_Zrn	5.0921	0.1288	0.3279	0.0123		1834.79	126.73	1828.14	79.33	1840.20	56.75	1840.198	56.751	3.084	0.655		old	0.655
							1072146az1_41_Zrn	3.1684	0.0807	0.2469	0.0093		1449.49	80.31	1422.27	59.81	1486.63	59.61	1486.632	59.612	4.010	4.329		old	4.329
							1072146az1_42_Zrn	2.3909	0.0610	0.2131	0.0080		1239.88	60.97	1245.42	51.71	1228.46	61.87	1228.462	61.866	5.036	-1.380		old	-1.380
							1072146az1_43_Zrn	2.5425	0.0653	0.2200	0.0083		1284.29	65.21	1281.81	53.50	1291.09	61.59	1291.093	61.589	4.770	0.719		old	0.719
							1072146az1_44_Zrn	7.3039	0.1858	0.3959	0.0150		2149.29	180.41	2149.91	96.15	2148.97	54.94	2148.971	54.939	2.557	-0.043		old	-0.043
							1072146az1_45_Zrn	0.6672	0.0171	0.0843	0.0032		519.02	17.32	521.63	20.54	506.28	69.56	521.630	20.535	3.937	-3.033		old	-3.033
							1072146az1_46_Zrn	0.6603	0.0172	0.0822	0.0031		514.78	17.43	509.25	20.04	534.93	70.11	509.251	20.038	3.935	4.801		old	4.801
							1072146az1_47_Zrn	4.3677	0.1094	0.3027	0.0114		1706.25	108.19	1704.71	73.19	1707.75	57.32	1707.750	57.320	3.356	0.178		old	0.178
							1072146az1_48_Zrn	2.5023	0.0638	0.2172	0.0082		1272.71	63.78	1266.85	52.78	1280.31	61.46	1280.314	61.461	4.800	1.051		old	1.051
							1072146az1_49_Zrn	0.8303	0.0233	0.0988	0.0037		613.78	23.48	607.46	23.94	625.68	72.19	607.462	23.940	3.941	2.911		old	2.911
							1072146az1_50_Zrn	4.8818	0.1231	0.3210	0.0121		1799.12	121.26	1794.67	77.75	1803.65	56.88	1803.647	56.885	3.154	0.498		old	0.498
							1072146az1_51_Zrn	4.9883	0.1264	0.3211	0.0121		1817.34	124.42	1795.19	77.88	1844.58	56.81	1844.582	56.813	3.080	2.677		old	2.677
							1072146az1_52_Zrn	4.5935	0.1163	0.3121	0.0118		1748.09	114.81	1750.93	75.67	1744.48	57.46	1744.481	57.458	3.294	-0.370		old	-0.370
							1072146az1_53_Zrn	3.2357	0.0817	0.2537	0.0096		1465.76	81.33	1457.47	61.52	1477.62	59.39	1477.625	59.388	4.019	1.364		old	1.364
							1072146az1_54_Zrn	3.4313	0.0900	0.2608	0.0099		1511.59	89.37	1494.11	63.48	1535.98	60.39	1535.981	60.395	3.932	2.726		old	2.726
							1072146az1_55_Zrn	3.2544	0.0835	0.2521	0.0095		1470.22	83.05	1449.14	61.25	1497.88	59.86	1497.876	59.864	3.997	3.254		old	3.254
							1072146az1_56_Zrn	4.7650	0.1204	0.3191	0.0120		1778.76	118.70	1785.53	77.31	1770.00	57.19	1769.997	57.186	3.231	-0.878		old	-0.878
							1072146az1_57_Zrn	2.5507	0.0643	0.2183	0.0082		1286.63	64.27	1272.73	52.97	1308.16	60.68	1308.155	60.679	4.638	2.708		old	2.708
							1072146az1_58_Zrn	3.3590	0.0866	0.2602	0.0098		1494.90	86.04	1491.03	63.18	1502.70	59.93	1502.699	59.928	3.988	0.777		old	0.777
							1072146az1_59_Zrn	3.7885	0.0973	0.2716	0.0103		1590.32	96.46	1549.03	66.39	1648.43	58.81	1648.430	58.813	3.568	6.030		old	6.030
							1072146az1_60_Zrn	4.4962	0.1134	0.3085	0.0116		1730.27	111.99	1733.13	74.65	1730.64	57.40	1730.643	57.399	3.317	-0.144		old	-0.144
							1072146az1_61_Zrn	4.9720	0.1254	0.3234	0.0122		1814.57	123.49	1806.20	78.34	1826.78	56.75	1826.778	56.750	3.107	1.127		old	1.127
							1072146az1_62_Zrn	2.3484	0.0607	0.2095	0.0079		1227.08	60.76	1226.30	50.98	1230.24	62.39	1230.242	62.388	5.071	0.321		old	0.321
							1072146az1_63_Zrn	1.6316	0.0414	0.1618	0.0061		982.48	41.61	966.64	39.32	1017.30	63.62	966.643	39.323	4.068	4.979		old	4.979
							1072146az1_64_Zrn	2.6050	0.0660	0.2208	0.0083		1302.03	65.96	1286.00	53.56	1328.15	60.76	1328.149	60.755	4.574	3.174		old	3.174
							1072146az1_65_Zrn	5.1623	0.1303	0.3245	0.0123		1846.43	128.20	1811.59	78.73	1882.62	56.43	1882.624	56.432	2.998	3.773		old	3.773
							1072146az1_66_Zrn	3.2207	0.0824	0.2537	0.0096		1462.15	82.02	1457.68	61.57	1465.19	59.97	1465.195	59.968	4.093	0.513		old	0.513
							1072146az1_67_Zrn	4.2402	0.1068	0.2936	0.0111		1681.85	105.62	1659.37	71.14	1709.76	57.51	1709.762	57.508	3.363	2.947		old	2.947
							1072146az1_68_Zrn	4.7039	0.1193	0.3111	0.0117		1767.94	117.61	1745.95	75.51	1792.51	57.18	1792.508	57.176	3.190	2.598		old	2.598
							1072146az1_69	3.5985	0.0916	0.2668	0.0101		1549.20	90.96	1524.49	64.83	1582.47	58.85	1582.469	58.855	3.719	3.664		old	3.664
							1072146az1_70_Zrn	2.5790	0.0658	0.2181	0.0083		1294.69	65.69	1271.82	53.11	1335.23	60.83	1335.232	60.834	4.556	4.749		old	4.749
							1072146az1_71_Zrn	5.0959	0.1295	0.3217	0.0122		1835.43	127.44	1798.01	78.27	1875.17	56.65	1875.173	56.654	3.021	4.115		old	4.115
							1072146az1_72_Zrn	3.3393	0.0843	0.2533	0.0096		1490.28	83.84	1455.59	61.50	1539.69	58.84	1539.689	58.840	3.822	5.462		old	5.462
							1072146az1_73_Zrn	1.5281	0.0400	0.1573	0.0059		941.73	40.26	941.48	38.23	938.23	65.77	941.480	38.232	4.061	-0.347		old	-0.347
							1072146az1_74_Zrn	3.5805	0.0925	0.2695	0.0102		1545.21	91.78	1538.10	65.67	1553.01	59.62	1553.014	59.617	3.839	0.960		old	0.960
							1072146az1_75_Zrn	3.3373	0.0875	0.2556	0.0097		1489.83	86.94	1467.07	62.51	1521.42	60.50	1521.420	60.497	3.976	3.572		old	3.572
							1072146az1_76_Zrn	1.6228	0.0439	0.1589	0.0060		979.07	44.13	950.47	38.90	1042.30	66.17	950.468	38.896	4.092	8.811		old	8.811
							1072146az1_77_Zrn	2.4328	0.0620	0.2142	0.0081		1252.35	62.02	1251.02	52.12	1253.34	61.66	1253.342	61.663	4.920	0.185		old	0.185
							1072146az1_78_Zrn	2.4277	0.0623	0.2124	0.0080		1250.84	62.24	1241.75	51.73	1265.53	61.77	1265.525	61.770	4.881	1.879		old	1.879
							1072146az1_79_Zrn	3.3224	0.0845	0.2583	0.0098		1486.33	84.00	1481.26	62.79	1491.95	59.48	1491.947	59.479	3.987	0.716		old	0.716
							1072146az1_80_Zrn	3.8060	0.0973	0.2727	0.0103		1594.02	96.46	1554.33	66.39	1647.06	58.54	1647.060	58.537	3.554	5.630		old	5.630
							1072146az1_81_Zrn	6.4282	0.1990	0.3881	0.0165		2036.13	192.64	2113.87	106.18	1956.32	64.84	1956.320	64.840	3.314	-8.053		old	-8.053		disc. inv
							1072146az1_82_Zrn	2.5525	0.0652	0.2192	0.0083		1287.14	65.19	1277.50	53.37	1308.53	61.19	1308.527	61.188	4.676	2.371		old	2.371
							1072146az1_83_Zrn	5.0786	0.1292	0.3212	0.0121		1832.54	127.08	1795.69	78.07	1870.37	56.70	1870.372	56.696	3.031	3.993		old	3.993
							1072146az1_84_Zrn	0.1355	0.0044	0.0192	0.0007		128.98	4.47	122.50	4.82	236.71	86.57	122.498	4.825	3.939	48.250		young	0.000
							1072146az1_85_Zrn	0.6060	0.0160	0.0776	0.0030		481.02	16.18	481.75	19.02	476.40	71.23	481.753	19.020	3.948	-1.124		old	-1.124
							1072146az1_86	4.5447	0.1159	0.3105	0.0117		1739.19	114.43	1743.14	75.43	1731.18	57.92	1731.179	57.918	3.346	-0.691		old	-0.691
							1072146az1_87_Zrn	4.9556	0.1258	0.3178	0.0120		1811.78	123.92	1778.93	77.16	1848.04	56.88	1848.043	56.885	3.078	3.740		old	3.740
							1072146az1_88_Zrn	1.4565	0.0385	0.1481	0.0056		912.58	38.69	890.28	36.07	965.45	65.93	890.275	36.069	4.051	7.787		old	7.787
							1072146az1_89_Zrn	3.2791	0.0821	0.2534	0.0095		1476.11	81.68	1455.91	61.29	1504.45	58.83	1504.455	58.827	3.910	3.227		old	3.227
							1072146az1_90_Zrn	3.0589	0.0782	0.2452	0.0092		1422.47	77.89	1413.43	59.42	1430.79	60.25	1430.787	60.251	4.211	1.213		old	1.213
							1072146az1_91_Zrn	5.7118	0.1434	0.3446	0.0130		1933.16	140.64	1908.66	83.36	1959.22	55.69	1959.218	55.695	2.843	2.581		old	2.581
							1072146az1_92_Zrn	5.8911	0.1484	0.3492	0.0132		1959.92	145.31	1930.62	84.50	1989.22	55.60	1989.217	55.603	2.795	2.946		old	2.946
							1072146az1_93_Zrn	3.2301	0.0817	0.2548	0.0096		1464.41	81.28	1463.43	61.78	1464.15	59.55	1464.150	59.551	4.067	0.049		old	0.049
							1072146az1_94_Zrn	2.6314	0.0689	0.2214	0.0084		1309.46	68.78	1289.07	53.86	1340.48	62.05	1340.480	62.048	4.629	3.835		old	3.835
							1072146az1_95_Zrn	4.4956	0.1129	0.3041	0.0114		1730.15	111.50	1711.45	73.56	1752.90	57.11	1752.896	57.113	3.258	2.364		old	2.364
							1072146az1_96_Zrn	2.3457	0.0592	0.2037	0.0077		1226.24	59.24	1195.18	49.55	1283.99	61.00	1283.992	61.002	4.751	6.917		old	6.917
							1072146az1_97_Zrn	3.2171	0.0808	0.2522	0.0095		1461.29	80.38	1449.78	61.06	1478.67	59.17	1478.668	59.170	4.002	1.953		old	1.953
							1072146az1_98_Zrn	3.2871	0.0828	0.2550	0.0096		1478.01	82.37	1464.41	61.76	1496.11	59.15	1496.111	59.148	3.953	2.119		old	2.119
							1072146az1_99_Zrn	3.3588	0.0848	0.2595	0.0098		1494.83	84.31	1487.05	62.92	1506.00	59.18	1505.999	59.182	3.930	1.258		old	1.258
							1072146az1_100_Zrn	3.3699	0.0857	0.2599	0.0098		1497.42	85.19	1489.19	62.93	1507.49	59.47	1507.489	59.466	3.945	1.214		old	1.214
							1072146az1_101_Zrn	2.4172	0.0621	0.2147	0.0081		1247.71	62.06	1253.93	52.09	1238.44	62.04	1238.441	62.037	5.009	-1.250		old	-1.250
							1072146az1_102_Zrn	2.9570	0.0756	0.2421	0.0091		1396.64	75.31	1397.85	58.84	1395.29	60.60	1395.287	60.602	4.343	-0.183		old	-0.183
							1072146az1_103_Zrn	4.9136	0.1239	0.3215	0.0121		1804.59	122.07	1796.84	77.73	1813.07	56.86	1813.068	56.861	3.136	0.895		old	0.895
							1072146az1_104_Zrn	3.0374	0.0775	0.2464	0.0093		1417.06	77.21	1419.93	59.70	1412.76	60.36	1412.765	60.359	4.272	-0.507		old	-0.507
							1072146az1_105_Zrn	1.5260	0.0389	0.1556	0.0059		940.89	39.15	932.53	37.70	957.92	64.42	932.529	37.697	4.042	2.650		old	2.650
							1072146az1_106_Zrn	4.8883	0.1225	0.3213	0.0121		1800.24	120.77	1795.95	77.66	1805.39	56.68	1805.395	56.677	3.139	0.523		old	0.523
							1072146az1_107_Zrn	4.4064	0.1108	0.2990	0.0113		1713.54	109.49	1686.25	72.44	1748.01	57.20	1748.015	57.197	3.272	3.534		old	3.534
							1072146az1_108_Zrn	2.2365	0.0591	0.1996	0.0075		1192.57	59.10	1173.32	48.57	1221.52	63.46	1221.517	63.458	5.195	3.945		old	3.945
							1072146az1_109_Zrn	3.4346	0.0861	0.2619	0.0099		1512.34	85.57	1499.76	63.40	1529.06	58.69	1529.061	58.695	3.839	1.916		old	1.916
							1072146az1_110_Zrn	3.3889	0.0850	0.2581	0.0097		1501.84	84.57	1480.33	62.55	1532.87	58.72	1532.866	58.722	3.831	3.427		old	3.427
37	U33	50	RON1001	1072-153	5.3676470	-73.1692630																						1101051	1085070	0.0000	0.0000		100	8	2	0	Socha Inferior	Early Paleocene		Early Paleocene?	Early - Middle Paleocene	Early - Middle Paleocene	6	6	This work
							1072153az1_1_Zrn	4.7567	0.1201	0.3167	0.0119		1777.29	118.43	1773.63	76.64	1779.19	57.11	1779.186	57.113	3.210	0.312		old	0.312
							1072153az1_2_Zrn	0.0805	0.0022	0.0119	0.0005		78.65	2.23	76.47	2.91	137.41	77.54	76.467	2.910	3.805	44.353		young	0.000
							1072153az1_3_Zrn	2.5629	0.0647	0.2233	0.0084		1290.13	64.65	1299.12	54.01	1275.95	61.02	1275.950	61.021	4.782	-1.816		old	-1.816
							1072153az1_4_Zrn	5.1369	0.1296	0.3266	0.0123		1842.23	127.47	1822.07	79.01	1863.39	56.50	1863.393	56.504	3.032	2.218		old	2.218
							1072153az1_5_Zrn	undefined	undefined	undefined	undefined		undefined	undefined	undefined	undefined	undefined	undefined	undefined	undefined	#VALUE!	#VALUE!	#VALUE!	old	#VALUE!	#VALUE!	#VALUE!
							1072153az1_6_Zrn	2.1728	0.0573	0.2007	0.0076		1172.38	57.41	1178.99	48.90	1153.17	64.09	1153.173	64.093	5.558	-2.239		old	-2.239
							1072153az1_7_Zrn	4.7149	0.1181	0.3122	0.0117		1769.90	116.52	1751.47	75.47	1789.80	56.76	1789.801	56.759	3.171	2.141		old	2.141
							1072153az1_8_Zrn	0.0792	0.0050	0.0117	0.0005		77.43	5.05	75.00	2.95	143.12	151.74	75.002	2.953	3.938	47.596		young	0.000
							1072153az1_9_Zrn	4.7100	0.1188	0.3147	0.0119		1769.02	117.22	1763.61	76.28	1774.77	57.16	1774.766	57.156	3.220	0.629		old	0.629
							1072153az1_10_Zrn	0.5605	0.0146	0.0733	0.0028		451.82	14.75	455.80	17.89	428.31	71.74	455.797	17.886	3.924	-6.417		old	-6.417		disc. inv
							1072153az1_11_Zrn	3.3698	0.0874	0.2615	0.0099		1497.41	86.85	1497.30	63.44	1495.45	60.25	1495.447	60.245	4.029	-0.124		old	-0.124
							1072153az1_12_Zrn	3.3829	0.0848	0.2607	0.0098		1500.44	84.37	1493.27	63.07	1509.93	58.86	1509.929	58.856	3.898	1.103		old	1.103
							1072153az1_13_Zrn	0.8113	0.0228	0.0971	0.0037		603.17	23.03	597.14	23.68	623.38	72.74	597.139	23.678	3.965	4.209		old	4.209
							1072153az1_14_Zrn	3.1262	0.0803	0.2468	0.0093		1439.17	79.91	1421.74	59.90	1460.68	60.22	1460.676	60.215	4.122	2.666		old	2.666
							1072153az1_15_Zrn	1.6166	0.0409	0.1631	0.0061		976.66	41.14	974.23	39.47	979.25	63.88	974.228	39.474	4.052	0.512		old	0.512
							1072153az1_16_Zrn	4.2755	0.1077	0.2976	0.0112		1688.66	106.47	1679.17	72.06	1702.42	57.61	1702.422	57.607	3.384	1.366		old	1.366
							1072153az1_17_Zrn	3.4477	0.0865	0.2642	0.0099		1515.36	85.98	1511.55	63.93	1518.86	58.82	1518.859	58.823	3.873	0.481		old	0.481
							1072153az1_18_Zrn	3.1934	0.0798	0.2509	0.0094		1455.55	79.42	1443.03	60.64	1473.50	58.99	1473.501	58.989	4.003	2.068		old	2.068
							1072153az1_19_Zrn	4.7745	0.1197	0.3155	0.0119		1780.43	118.00	1767.56	76.26	1793.15	56.75	1793.148	56.755	3.165	1.427		old	1.427
							1072153az1_20_Zrn	2.6253	0.0670	0.2244	0.0084		1307.76	66.88	1304.83	54.33	1309.03	61.15	1309.028	61.152	4.672	0.321		old	0.321
							1072153az1_21_Zrn	5.4046	0.1362	0.3370	0.0127		1885.58	133.75	1872.25	81.53	1898.60	56.24	1898.604	56.235	2.962	1.388		old	1.388
							1072153az1_22_Zrn	3.0491	0.0769	0.2457	0.0093		1420.01	76.64	1416.38	59.56	1424.00	59.76	1424.002	59.762	4.197	0.535		old	0.535
							1072153az1_23_Zrn	0.0880	0.0029	0.0129	0.0005		85.66	2.98	82.84	3.23	166.68	89.31	82.844	3.234	3.903	50.297		young	0.000
							1072153az1_24_Zrn	1.4866	0.0437	0.1578	0.0060		924.91	43.87	944.55	38.56	869.26	72.30	944.554	38.562	4.083	-8.662		old	-8.662		disc. inv
							1072153az1_25_Zrn	3.4112	0.0858	0.2616	0.0098		1506.98	85.29	1498.23	63.33	1518.43	58.92	1518.431	58.919	3.880	1.331		old	1.331
							1072153az1_26_Zrn	undefined	undefined	undefined	undefined		undefined	undefined	undefined	undefined	undefined	undefined	undefined	undefined	#VALUE!	#VALUE!	#VALUE!	old	#VALUE!	#VALUE!	#VALUE!
							1072153az1_27_Zrn	2.6563	0.0683	0.2255	0.0085		1316.40	68.18	1310.94	54.71	1318.46	61.44	1318.461	61.443	4.660	0.571		old	0.571
							1072153az1_28_Zrn	undefined	undefined	undefined	undefined		undefined	undefined	undefined	undefined	undefined	undefined	undefined	undefined	#VALUE!	#VALUE!	#VALUE!	old	#VALUE!	#VALUE!	#VALUE!
							1072153az1_29_Zrn	3.3312	0.0854	0.2587	0.0097		1488.38	84.88	1483.10	62.65	1492.09	59.87	1492.090	59.871	4.013	0.603		old	0.603
							1072153az1_30_Zrn	3.3771	0.0848	0.2604	0.0098		1499.10	84.31	1492.01	63.07	1508.48	58.92	1508.482	58.918	3.906	1.092		old	1.092
							1072153az1_31_Zrn	3.1574	0.0795	0.2515	0.0095		1446.80	79.20	1446.13	60.89	1446.63	59.56	1446.634	59.556	4.117	0.035		old	0.035
							1072153az1_32_Zrn	1.5792	0.0413	0.1597	0.0060		962.05	41.52	954.97	38.77	974.59	65.38	954.970	38.768	4.060	2.013		old	2.013
							1072153az1_33_Zrn	0.4298	0.0109	0.0588	0.0022		363.02	11.05	368.38	14.25	327.84	71.20	368.375	14.247	3.867	-12.364		old	-12.364		disc. inv
							1072153az1_34_Zrn	3.3153	0.0831	0.2552	0.0096		1484.65	82.68	1465.35	61.80	1514.14	58.80	1514.143	58.801	3.883	3.223		old	3.223
							1072153az1_35_Zrn	3.4184	0.0878	0.2614	0.0099		1508.64	87.28	1496.84	63.37	1521.19	59.79	1521.186	59.790	3.930	1.600		old	1.600
							1072153az1_36_Zrn	0.5571	0.0145	0.0719	0.0027		449.65	14.69	447.49	17.47	452.15	70.96	447.486	17.471	3.904	1.032		old	1.032
							1072153az1_37_Zrn	4.6340	0.1176	0.3105	0.0117		1755.41	116.03	1743.07	75.13	1769.15	57.39	1769.147	57.389	3.244	1.474		old	1.474
							1072153az1_38_Zrn	3.2988	0.0829	0.2551	0.0096		1480.77	82.49	1464.91	61.89	1504.36	59.03	1504.356	59.030	3.924	2.622		old	2.622
							1072153az1_39_Zrn	5.7151	0.1474	0.3358	0.0128		1933.66	144.37	1866.25	82.44	2011.77	56.40	2011.774	56.401	2.804	7.234		old	7.234
							1072153az1_40_Zrn	1.8287	0.0473	0.1743	0.0066		1055.81	47.49	1035.80	42.63	1087.90	63.76	1087.897	63.760	5.861	4.788		old	4.788
							1072153az1_41_Zrn	5.3096	0.1331	0.3343	0.0126		1870.41	130.84	1859.38	80.88	1882.58	56.16	1882.577	56.159	2.983	1.232		old	1.232
							1072153az1_42_Zrn	3.3685	0.0863	0.2604	0.0098		1497.10	85.76	1491.73	63.31	1504.68	59.77	1504.680	59.765	3.972	0.860		old	0.860
							1072153az1_43_Zrn	3.3814	0.0898	0.2582	0.0098		1500.09	89.24	1480.71	62.78	1524.92	61.09	1524.921	61.088	4.006	2.899		old	2.899
							1072153az1_44_Zrn	4.7525	0.1204	0.3125	0.0118		1776.55	118.71	1753.00	75.79	1803.20	57.13	1803.197	57.131	3.168	2.784		old	2.784
							1072153az1_45_Zrn	0.5849	0.0165	0.0760	0.0029		467.59	16.66	472.32	18.57	439.30	75.01	472.316	18.572	3.932	-7.517		old	-7.517		disc. inv
							1072153az1_46_Zrn	0.8397	0.0222	0.1006	0.0038		618.98	22.42	617.63	24.53	619.02	69.72	617.631	24.531	3.972	0.224		old	0.224
							1072153az1_47_Zrn	0.6355	0.0165	0.0809	0.0031		499.49	16.72	501.39	19.72	491.38	70.43	501.390	19.723	3.934	-2.036		old	-2.036
							1072153az1_48_Zrn	2.1988	0.0585	0.1961	0.0074		1180.65	58.59	1154.34	47.69	1230.64	63.65	1230.636	63.647	5.172	6.200		old	6.200
							1072153az1_49_Zrn	3.4616	0.0870	0.2658	0.0100		1518.51	86.49	1519.58	64.37	1516.07	58.87	1516.075	58.866	3.883	-0.231		old	-0.231
							1072153az1_50_Zrn	2.2299	0.0569	0.2016	0.0076		1190.50	57.00	1183.87	49.09	1202.12	62.13	1202.115	62.129	5.168	1.517		old	1.517
							1072153az1_51_Zrn	3.3116	0.0854	0.2562	0.0097		1483.78	84.88	1470.56	62.36	1502.55	59.95	1502.553	59.945	3.990	2.129		old	2.129
							1072153az1_52_Zrn	5.2299	0.1320	0.3322	0.0125		1857.50	129.77	1849.11	80.57	1869.28	56.40	1869.281	56.398	3.017	1.079		old	1.079
							1072153az1_53_Zrn	3.2771	0.0851	0.2564	0.0097		1475.64	84.62	1471.26	62.58	1479.72	60.51	1479.719	60.509	4.089	0.572		old	0.572
							1072153az1_54_Zrn	3.5444	0.0930	0.2700	0.0102		1537.19	92.26	1540.62	65.65	1528.43	60.50	1528.427	60.502	3.958	-0.798		old	-0.798
							1072153az1_55_Zrn	1.7234	0.0444	0.1725	0.0065		1017.31	44.56	1025.61	41.84	998.79	64.41	998.793	64.413	6.449	-2.685		old	-2.685
							1072153az1_56_Zrn	3.4080	0.0898	0.2633	0.0099		1506.23	89.24	1506.84	63.93	1509.31	60.81	1509.312	60.809	4.029	0.164		old	0.164
							1072153az1_57_Zrn	0.6540	0.0172	0.0833	0.0032		510.93	17.42	515.79	20.35	483.18	71.09	515.788	20.353	3.946	-6.748		old	-6.748		disc. inv
							1072153az1_58_Zrn	1.1350	0.0299	0.1239	0.0047		770.13	30.15	752.70	30.04	806.03	67.35	752.702	30.044	3.992	6.617		old	6.617
							1072153az1_59_Zrn	3.3672	0.0858	0.2605	0.0098		1496.80	85.31	1492.42	63.08	1503.21	59.53	1503.212	59.528	3.960	0.718		old	0.718
							1072153az1_60_Zrn	0.9331	0.0245	0.1084	0.0041		669.25	24.73	663.33	26.35	689.88	68.59	663.332	26.348	3.972	3.848		old	3.848
							1072153az1_61_Zrn	3.3037	0.0829	0.2585	0.0097		1481.92	82.51	1482.04	62.53	1483.76	59.08	1483.755	59.085	3.982	0.115		old	0.115
							1072153az1_62_Zrn	4.8608	0.1221	0.3214	0.0121		1795.48	120.33	1796.76	77.75	1795.92	56.80	1795.924	56.800	3.163	-0.047		old	-0.047
							1072153az1_63_Zrn	0.5761	0.0148	0.0740	0.0028		461.93	14.99	460.15	17.94	472.98	70.06	460.146	17.942	3.899	2.713		old	2.713
							1072153az1_64_Zrn	2.5024	0.0638	0.2180	0.0082		1272.74	63.77	1271.10	52.85	1276.36	61.46	1276.355	61.464	4.816	0.412		old	0.412
							1072153az1_65_Zrn	3.4165	0.0865	0.2621	0.0099		1508.20	85.98	1500.36	63.44	1519.02	59.17	1519.019	59.165	3.895	1.229		old	1.229
							1072153az1_66_Zrn	2.5323	0.0638	0.2185	0.0082		1281.36	63.73	1273.79	52.91	1293.76	60.79	1293.764	60.795	4.699	1.544		old	1.544
							1072153az1_67_Zrn	0.0711	0.0022	0.0107	0.0004		69.70	2.20	68.55	2.62	116.88	84.14	68.545	2.616	3.817	41.355		young	0.000
							1072153az1_68_Zrn	3.4224	0.0860	0.2613	0.0098		1509.55	85.48	1496.27	63.27	1528.52	58.82	1528.520	58.822	3.848	2.110		old	2.110
							1072153az1_69_Zrn	4.5599	0.1143	0.3066	0.0115		1741.96	112.84	1723.98	74.10	1764.25	56.93	1764.253	56.929	3.227	2.283		old	2.283
							1072153az1_70_Zrn	1.4000	0.0355	0.1471	0.0055		888.92	35.71	884.80	35.70	902.42	64.70	884.800	35.705	4.035	1.952		old	1.952
							1072153az1_71_Zrn	3.1296	0.0789	0.2457	0.0093		1440.01	78.55	1416.15	59.64	1477.27	59.32	1477.269	59.319	4.015	4.137		old	4.137
							1072153az1_72_Zrn	2.2809	0.0589	0.2059	0.0078		1206.41	58.90	1206.94	49.87	1201.48	62.61	1201.476	62.612	5.211	-0.455		old	-0.455
							1072153az1_73_Zrn	3.4274	0.0871	0.2646	0.0100		1510.70	86.56	1513.19	64.07	1506.52	59.43	1506.517	59.432	3.945	-0.443		old	-0.443
							1072153az1_74_Zrn	0.2452	0.0075	0.0344	0.0013		222.71	7.60	217.82	8.37	273.63	81.82	217.824	8.373	3.844	20.395		young	0.000
							1072153az1_75_Zrn	0.9585	0.0245	0.1100	0.0042		682.54	24.71	672.94	26.82	714.14	67.11	672.940	26.824	3.986	5.769		old	5.769
							1072153az1_76_Zrn	0.1669	0.0061	0.0231	0.0009		156.77	6.21	147.47	5.71	296.04	93.84	147.465	5.714	3.875	50.187		young	0.000
							1072153az1_77_Zrn	2.9709	0.0742	0.2412	0.0091		1400.21	73.98	1392.90	58.28	1410.68	59.48	1410.682	59.477	4.216	1.260		old	1.260
							1072153az1_78_Zrn	4.6453	0.1470	0.3018	0.0132		1757.44	144.02	1700.10	84.85	1826.59	68.14	1826.592	68.144	3.731	6.925		old	6.925
							1072153az1_79_Zrn	3.3082	0.0832	0.2589	0.0097		1482.98	82.78	1484.29	62.66	1479.83	59.22	1479.830	59.217	4.002	-0.301		old	-0.301
							1072153az1_80_Zrn	3.3217	0.0835	0.2572	0.0097		1486.16	83.05	1475.73	62.29	1501.21	59.05	1501.210	59.049	3.933	1.697		old	1.697
							1072153az1_81_Zrn	2.4750	0.0626	0.2154	0.0081		1264.74	62.62	1257.71	52.18	1275.13	61.16	1275.134	61.158	4.796	1.367		old	1.367
							1072153az1_82_Zrn	4.5268	0.1135	0.3040	0.0114		1735.91	112.12	1711.13	73.57	1767.80	56.96	1767.795	56.962	3.222	3.206		old	3.206
							1072153az1_83_Zrn	0.6034	0.0156	0.0767	0.0029		479.39	15.81	476.66	18.60	485.94	70.22	476.658	18.604	3.903	1.910		old	1.910
							1072153az1_84_Zrn	2.6490	0.0665	0.2245	0.0084		1314.37	66.41	1305.36	54.31	1328.15	60.37	1328.147	60.366	4.545	1.716		old	1.716
							1072153az1_85_Zrn	1.7713	0.0446	0.1729	0.0065		1034.98	44.79	1027.80	41.87	1051.55	62.97	1051.545	62.966	5.988	2.258		old	2.258
							1072153az1_86_Zrn	2.7955	0.0701	0.2307	0.0087		1354.35	69.95	1338.27	55.79	1379.15	59.90	1379.154	59.899	4.343	2.964		old	2.964
							1072153az1_87_Zrn	undefined	undefined	undefined	undefined		undefined	undefined	undefined	undefined	undefined	undefined	undefined	undefined	#VALUE!	#VALUE!	#VALUE!	old	#VALUE!	#VALUE!	#VALUE!
							1072153az1_88_Zrn	5.0117	0.1263	0.3273	0.0123		1821.30	124.34	1825.18	79.17	1814.57	56.83	1814.568	56.830	3.132	-0.585		old	-0.585
							1072153az1_89_Zrn	3.3230	0.0841	0.2528	0.0095		1486.48	83.66	1452.79	61.24	1531.14	59.08	1531.145	59.083	3.859	5.118		old	5.118
							1072153az1_90_Zrn	0.2022	0.0095	0.0242	0.0009		187.00	9.66	154.39	5.89	610.24	108.23	154.386	5.895	3.818	74.701		young	0.000
							1072153az1_91_Zrn	4.8594	0.1243	0.3194	0.0120		1795.25	122.42	1786.65	77.41	1804.85	57.46	1804.853	57.460	3.184	1.008		old	1.008
							1072153az1_92_Zrn	2.5540	0.0663	0.2155	0.0081		1287.58	66.28	1257.80	52.28	1334.64	61.76	1334.636	61.756	4.627	5.757		old	5.757
							1072153az1_93_Zrn	0.0821	0.0029	0.0118	0.0004		80.13	2.92	75.68	2.89	205.09	91.75	75.684	2.889	3.817	63.097		young	0.000
							1072153az1_94_Zrn	5.4719	0.1394	0.3307	0.0126		1896.20	136.86	1841.97	80.68	1957.65	56.33	1957.654	56.333	2.878	5.909		old	5.909
							1072153az1_95_Zrn	3.3600	0.0841	0.2581	0.0097		1495.12	83.67	1479.97	62.42	1516.83	58.75	1516.828	58.747	3.873	2.430		old	2.430
							1072153az1_96_Zrn	4.3861	0.1100	0.3025	0.0114		1709.72	108.68	1703.67	73.15	1717.91	57.28	1717.914	57.279	3.334	0.829		old	0.829
							1072153az1_97_Zrn	3.4109	0.0852	0.2586	0.0097		1506.91	84.75	1482.62	62.50	1540.46	58.47	1540.456	58.471	3.796	3.755		old	3.755
							1072153az1_98_Zrn	5.1661	0.1302	0.3305	0.0125		1847.05	128.11	1840.92	80.01	1852.62	56.56	1852.616	56.557	3.053	0.631		old	0.631
							1072153az1_99_Zrn	3.4308	0.0863	0.2601	0.0098		1511.48	85.83	1490.58	63.04	1539.02	58.79	1539.019	58.787	3.820	3.147		old	3.147
							1072153az1_100_Zrn	1.1597	0.0298	0.1259	0.0048		781.83	30.07	764.46	30.63	835.44	66.07	764.461	30.628	4.007	8.496		old	8.496
							1072153az1_101_Zrn	0.7734	0.0195	0.0948	0.0036		581.73	19.74	583.67	22.99	579.29	67.93	583.674	22.991	3.939	-0.757		old	-0.757
							1072153az1_102_Zrn	1.5216	0.0450	0.1632	0.0062		939.10	45.20	974.65	39.93	855.55	72.55	974.646	39.928	4.097	-13.921		old	-13.921		disc. inv
							1072153az1_103_Zrn	0.0893	0.0088	0.0096	0.0004		86.89	8.94	61.54	2.67	851.75	205.18	61.540	2.672	4.342	92.775		young	0.000
							1072153az1_104_Zrn	5.6072	0.1422	0.3436	0.0130		1917.20	139.51	1904.00	83.38	1932.70	56.24	1932.696	56.235	2.910	1.485		old	1.485
							1072153az1_105_Zrn	5.2999	0.1369	0.3285	0.0124		1868.85	134.49	1830.92	79.96	1910.14	57.14	1910.144	57.136	2.991	4.147		old	4.147
							1072153az1_106_Zrn	2.0753	0.0525	0.1904	0.0072		1140.68	52.58	1123.74	46.17	1172.79	61.95	1172.793	61.953	5.283	4.183		old	4.183
							1072153az1_107_Zrn	3.4945	0.0881	0.2615	0.0099		1525.98	87.50	1497.61	63.35	1565.58	58.58	1565.578	58.581	3.742	4.341		old	4.341
							1072153az1_108_Zrn	0.0679	0.0041	0.0091	0.0004		66.71	4.19	58.19	2.31	383.35	141.10	58.187	2.313	3.975	84.821		young	0.000
							1072153az1_109_Zrn	5.8902	0.1493	0.3500	0.0132		1959.79	146.24	1934.79	84.88	1989.68	55.80	1989.677	55.804	2.805	2.759		old	2.759
							1072153az1_110_Zrn	1.6038	0.0440	0.1561	0.0059		971.70	44.15	934.91	38.01	1043.78	66.71	934.912	38.006	4.065	10.430		old	10.430
38	U34	54	UME-1001	1072-157	5.2290540	-73.4027840																						1075182	1069709	0.0000	0.0000		60	1	0	0	Socha Inferior	Early Paleocene				Early - Middle Paleocene	2	2	This work
39	U35	57	UMS-1001	1072-160	5.2657200	-73.3020740																						1086343	1073777	0.0000	0.0000		100	5	0	0	Socha Inferior base	Early Paleocene		Early Paleocene?	Early Paleocene	Early Paleocene	5	5	This work
							1072160az1_1_Zrn	2.4725	0.0579	0.2150	0.0074		1264.03	57.97	1255.14	47.72	1277.22	56.35	1277.219	56.354	4.412	1.729		old	1.729
							1072160az1_2_Zrn	2.6988	0.0623	0.2304	0.0079		1328.14	62.34	1336.82	51.03	1317.41	55.50	1317.415	55.496	4.212	-1.473		old	-1.473
							1072160az1_3_Zrn	0.0933	0.0031	0.0130	0.0005		90.57	3.14	83.16	2.96	277.29	85.64	83.157	2.956	3.555	70.011		young	0.000
							1072160az1_4_Zrn	3.1679	0.0783	0.2495	0.0086		1449.36	77.95	1436.02	55.27	1464.36	56.85	1464.356	56.847	3.882	1.935		old	1.935
							1072160az1_5_Zrn	0.8108	0.0197	0.0984	0.0034		602.88	19.86	604.92	21.88	591.07	64.18	604.916	21.878	3.617	-2.342		old	-2.342
							1072160az1_6_Zrn	2.0953	0.0489	0.1958	0.0067		1147.26	49.01	1152.59	43.43	1134.59	57.37	1134.589	57.369	5.056	-1.586		old	-1.586
							1072160az1_7_Zrn	0.0805	0.0049	0.0108	0.0004		78.65	4.93	69.05	2.61	380.30	140.58	69.049	2.615	3.787	81.844		young	0.000
							1072160az1_8_Zrn	2.6905	0.0618	0.2310	0.0079		1325.85	61.76	1339.69	51.08	1304.28	55.40	1304.279	55.397	4.247	-2.715		old	-2.715
							1072160az1_9_Zrn	3.3002	0.0768	0.2532	0.0088		1481.09	76.49	1455.15	56.29	1521.52	54.31	1521.521	54.312	3.570	4.362		old	4.362
							1072160az1_10_Zrn	undefined	undefined	undefined	undefined		undefined	undefined	undefined	undefined	undefined	undefined	undefined	undefined	#VALUE!	#VALUE!	#VALUE!	old	#VALUE!	#VALUE!	#VALUE!
							1072160az1_11_Zrn	2.7857	0.0683	0.2326	0.0080		1351.70	68.22	1347.92	51.55	1353.48	57.45	1353.483	57.450	4.245	0.411		old	0.411
							1072160az1_12_Zrn	3.2865	0.0864	0.2526	0.0087		1477.85	85.89	1451.77	56.23	1514.61	59.06	1514.606	59.063	3.900	4.149		old	4.149
							1072160az1_13_Zrn	3.0612	0.0711	0.2471	0.0085		1423.03	70.97	1423.72	54.71	1426.22	54.87	1426.222	54.874	3.848	0.175		old	0.175
							1072160az1_14_Zrn	4.7076	0.1084	0.3148	0.0108		1768.59	107.16	1764.52	69.63	1775.75	52.13	1775.749	52.132	2.936	0.633		old	0.633
							1072160az1_15_Zrn	undefined	undefined	undefined	undefined		undefined	undefined	undefined	undefined	undefined	undefined	undefined	undefined	#VALUE!	#VALUE!	#VALUE!	old	#VALUE!	#VALUE!	#VALUE!
							1072160az1_16_Zrn	3.4520	0.0808	0.2626	0.0090		1516.34	80.46	1502.90	58.16	1532.67	54.44	1532.669	54.440	3.552	1.942		old	1.942
							1072160az1_17_Zrn	2.5676	0.0600	0.2221	0.0077		1291.45	60.05	1292.96	49.30	1292.12	56.12	1292.118	56.117	4.343	-0.065		old	-0.065
							1072160az1_18_Zrn	3.5126	0.0819	0.2644	0.0091		1530.05	81.55	1512.48	58.65	1554.85	54.11	1554.854	54.111	3.480	2.726		old	2.726
							1072160az1_19_Zrn	2.1255	0.0498	0.1981	0.0069		1157.11	49.92	1164.97	44.44	1134.46	58.46	1134.458	58.459	5.153	-2.689		old	-2.689
							1072160az1_20_Zrn	4.1106	0.0949	0.2931	0.0101		1656.41	94.18	1657.17	64.85	1655.31	53.03	1655.308	53.031	3.204	-0.113		old	-0.113
							1072160az1_21_Zrn	2.1623	0.0733	0.1949	0.0067		1169.02	73.07	1147.84	43.17	1201.36	74.23	1201.362	74.234	6.179	4.455		old	4.455
							1072160az1_22_Zrn	1.6696	0.0394	0.1690	0.0058		997.04	39.65	1006.66	37.65	975.02	59.33	975.019	59.329	6.085	-3.245		old	-3.245
							1072160az1_23_Zrn	4.5111	0.1040	0.3082	0.0106		1733.02	102.99	1732.08	68.16	1731.40	52.50	1731.403	52.501	3.032	-0.039		old	-0.039
							1072160az1_24_Zrn	undefined	undefined	undefined	undefined		undefined	undefined	undefined	undefined	undefined	undefined	undefined	undefined	#VALUE!	#VALUE!	#VALUE!	old	#VALUE!	#VALUE!	#VALUE!
							1072160az1_25_Zrn	5.0680	0.1165	0.3249	0.0112		1830.77	114.94	1813.64	71.80	1849.87	51.61	1849.868	51.607	2.790	1.959		old	1.959
							1072160az1_26_Zrn	3.2747	0.0764	0.2578	0.0089		1475.05	76.10	1478.73	57.14	1469.40	54.70	1469.401	54.699	3.723	-0.635		old	-0.635
							1072160az1_27_Zrn	3.3168	0.0767	0.2558	0.0088		1485.00	76.46	1468.52	56.70	1514.84	54.09	1514.835	54.087	3.571	3.057		old	3.057
							1072160az1_28_Zrn	2.2283	0.0515	0.2007	0.0069		1189.97	51.67	1178.97	44.46	1209.27	56.42	1209.272	56.420	4.666	2.506		old	2.506
							1072160az1_29_Zrn	0.6664	0.0160	0.0826	0.0029		518.52	16.13	511.74	18.39	553.24	64.00	511.745	18.390	3.594	7.500		old	7.500
							1072160az1_30_Zrn	3.3701	0.0776	0.2578	0.0089		1497.47	77.33	1478.63	57.08	1524.95	53.87	1524.954	53.870	3.533	3.038		old	3.038
							1072160az1_31_Zrn	1.8414	0.0426	0.1799	0.0062		1060.37	42.78	1066.45	39.85	1048.95	57.77	1048.949	57.771	5.507	-1.668		old	-1.668
							1072160az1_32_Zrn	3.1386	0.0732	0.2507	0.0086		1442.21	72.95	1442.14	55.48	1440.31	54.89	1440.309	54.887	3.811	-0.127		old	-0.127
							1072160az1_33_Zrn	4.7851	0.1117	0.3165	0.0110		1782.29	110.33	1772.50	70.40	1801.57	52.52	1801.566	52.519	2.915	1.613		old	1.613
							1072160az1_34_Zrn	2.5666	0.0598	0.2209	0.0076		1291.17	59.82	1286.55	48.90	1298.59	55.94	1298.591	55.941	4.308	0.927		old	0.927
							1072160az1_35_Zrn	4.9865	0.1159	0.3228	0.0111		1817.04	114.39	1803.16	71.60	1831.77	52.10	1831.774	52.104	2.844	1.562		old	1.562
							1072160az1_36_Zrn	3.4774	0.0808	0.2672	0.0092		1522.10	80.42	1526.55	59.29	1516.61	54.20	1516.609	54.195	3.573	-0.655		old	-0.655
							1072160az1_37_Zrn	4.6310	0.1080	0.3144	0.0108		1754.88	106.83	1762.10	69.75	1744.02	52.84	1744.021	52.836	3.030	-1.037		old	-1.037
							1072160az1_38_Zrn	undefined	undefined	undefined	undefined		undefined	undefined	undefined	undefined	undefined	undefined	undefined	undefined	#VALUE!	#VALUE!	#VALUE!	old	#VALUE!	#VALUE!	#VALUE!
							1072160az1_39_Zrn	1.5945	0.0375	0.1640	0.0057		968.08	37.72	978.75	36.45	944.98	59.37	978.754	36.454	3.725	-3.574		old	-3.574
							1072160az1_40_Zrn	1.7054	0.0412	0.1687	0.0058		1010.57	41.37	1004.91	37.62	1022.30	59.64	1022.297	59.644	5.834	1.700		old	1.700
							1072160az1_41_Zrn	undefined	undefined	undefined	undefined		undefined	undefined	undefined	undefined	undefined	undefined	undefined	undefined	#VALUE!	#VALUE!	#VALUE!	old	#VALUE!	#VALUE!	#VALUE!
							1072160az1_42_Zrn	2.6612	0.0627	0.2222	0.0077		1317.74	62.69	1293.39	49.52	1353.92	55.94	1353.919	55.944	4.132	4.470		old	4.470
							1072160az1_43_Zrn	0.7774	0.0197	0.0943	0.0033		584.00	19.94	581.06	21.11	589.15	66.18	581.061	21.112	3.633	1.373		old	1.373
							1072160az1_44_Zrn	2.1700	0.0534	0.1965	0.0069		1171.48	53.55	1156.74	44.11	1193.03	59.09	1193.030	59.091	4.953	3.042		old	3.042
							1072160az1_45_Zrn	2.1103	0.0503	0.1970	0.0068		1152.17	50.43	1159.13	43.83	1138.73	58.14	1138.735	58.140	5.106	-1.791		old	-1.791
							1072160az1_46_Zrn	4.6413	0.1083	0.3108	0.0107		1756.73	107.09	1744.50	69.07	1769.92	52.65	1769.915	52.653	2.975	1.436		old	1.436
							1072160az1_47_Zrn	2.1609	0.0526	0.1988	0.0070		1168.57	52.68	1168.65	44.86	1187.42	58.46	1187.422	58.455	4.923	1.580		old	1.580
							1072160az1_48_Zrn	2.8216	0.0681	0.2338	0.0082		1361.28	67.95	1354.59	52.46	1374.27	56.36	1374.269	56.356	4.101	1.432		old	1.432
							1072160az1_49_Zrn	3.5497	0.0844	0.2746	0.0095		1538.37	83.92	1564.24	61.38	1503.82	55.09	1503.819	55.090	3.663	-4.018		old	-4.018
							1072160az1_50_Zrn	2.6617	0.0618	0.2257	0.0078		1317.88	61.84	1311.95	50.06	1328.61	55.58	1328.610	55.584	4.184	1.254		old	1.254
							1072160az1_51_Zrn	4.7445	0.1103	0.3135	0.0108		1775.13	109.05	1757.74	69.60	1795.33	52.32	1795.334	52.322	2.914	2.094		old	2.094
							1072160az1_52_Zrn	4.3011	0.1000	0.2959	0.0102		1693.56	99.09	1670.74	65.74	1719.53	52.87	1719.527	52.874	3.075	2.837		old	2.837
							1072160az1_53_Zrn	0.1684	0.0042	0.0243	0.0008		158.03	4.25	154.84	5.41	202.70	69.80	154.845	5.413	3.496	23.608		young	0.000
							1072160az1_54_Zrn	3.2656	0.0755	0.2549	0.0088		1472.90	75.23	1463.56	56.52	1488.53	54.22	1488.529	54.219	3.642	1.677		old	1.677
							1072160az1_55_Zrn	5.1879	0.1216	0.3280	0.0113		1850.64	119.82	1828.59	72.76	1877.30	52.09	1877.297	52.094	2.775	2.594		old	2.594
							1072160az1_56_Zrn	4.6962	0.1090	0.3145	0.0109		1766.57	107.77	1762.65	69.80	1770.88	52.43	1770.884	52.429	2.961	0.465		old	0.465
							1072160az1_57_Zrn	0.8200	0.0194	0.0994	0.0034		608.06	19.58	610.95	22.13	594.67	62.94	610.952	22.125	3.621	-2.738		old	-2.738
							1072160az1_58_Zrn	undefined	undefined	undefined	undefined		undefined	undefined	undefined	undefined	undefined	undefined	undefined	undefined	#VALUE!	#VALUE!	#VALUE!	old	#VALUE!	#VALUE!	#VALUE!
							1072160az1_59_Zrn	2.4245	0.0573	0.2156	0.0074		1249.88	57.33	1258.46	47.91	1238.88	56.96	1238.879	56.960	4.598	-1.581		old	-1.581
							1072160az1_60_Zrn	4.5187	0.1063	0.3052	0.0106		1734.41	105.19	1717.14	67.99	1755.87	52.92	1755.871	52.924	3.014	2.206		old	2.206
							1072160az1_61_Zrn	3.8159	0.0912	0.2787	0.0097		1596.09	90.58	1584.69	62.14	1610.41	54.50	1610.409	54.504	3.384	1.597		old	1.597
							1072160az1_62_Zrn	0.1559	0.0065	0.0219	0.0009		147.12	6.63	139.89	5.49	262.49	103.52	139.891	5.491	3.925	46.706		young	0.000
							1072160az1_63_Zrn	4.8608	0.1134	0.3180	0.0110		1795.49	112.03	1779.77	70.97	1808.98	52.60	1808.983	52.603	2.908	1.615		old	1.615
							1072160az1_64_Zrn	1.6926	0.0433	0.1660	0.0058		1005.75	43.54	990.21	37.07	1036.20	62.10	990.209	37.065	3.743	4.438		old	4.438
							1072160az1_65_Zrn	1.4541	0.0339	0.1507	0.0052		911.59	34.17	904.74	33.49	933.30	59.13	904.744	33.485	3.701	3.059		old	3.059
							1072160az1_66_Zrn	4.6481	0.1080	0.3107	0.0107		1757.95	106.76	1744.11	68.87	1772.65	52.50	1772.649	52.504	2.962	1.610		old	1.610
							1072160az1_67_Zrn	4.2189	0.0997	0.2883	0.0101		1677.70	98.81	1632.84	65.06	1736.52	53.63	1736.518	53.633	3.089	5.971		old	5.971
							1072160az1_68_Zrn	3.2111	0.0807	0.2473	0.0090		1459.85	80.35	1424.39	57.84	1514.94	57.62	1514.940	57.623	3.804	5.977		old	5.977
							1072160az1_69_Zrn	undefined	undefined	undefined	undefined		undefined	undefined	undefined	undefined	undefined	undefined	undefined	undefined	#VALUE!	#VALUE!	#VALUE!	old	#VALUE!	#VALUE!	#VALUE!
							1072160az1_70_Zrn	2.3479	0.0545	0.2085	0.0072		1226.92	54.59	1221.00	46.20	1234.98	56.34	1234.984	56.342	4.562	1.132		old	1.132
							1072160az1_71_Zrn	4.4987	0.1041	0.3031	0.0104		1730.73	103.01	1706.81	67.09	1759.15	52.40	1759.150	52.405	2.979	2.975		old	2.975
							1072160az1_72_Zrn	undefined	undefined	undefined	undefined		undefined	undefined	undefined	undefined	undefined	undefined	undefined	undefined	#VALUE!	#VALUE!	#VALUE!	old	#VALUE!	#VALUE!	#VALUE!
							1072160az1_73_Zrn	undefined	undefined	undefined	undefined		undefined	undefined	undefined	undefined	undefined	undefined	undefined	undefined	#VALUE!	#VALUE!	#VALUE!	old	#VALUE!	#VALUE!	#VALUE!
							1072160az1_74_Zrn	5.0627	0.1173	0.3220	0.0111		1829.88	115.71	1799.44	71.44	1865.85	51.82	1865.853	51.817	2.777	3.560		old	3.560
							1072160az1_75_Zrn	3.4069	0.0794	0.2626	0.0091		1505.98	79.06	1503.08	58.23	1513.62	54.37	1513.619	54.369	3.592	0.696		old	0.696
							1072160az1_76_Zrn	3.2514	0.0753	0.2548	0.0088		1469.51	75.09	1463.00	56.48	1476.86	54.39	1476.864	54.391	3.683	0.938		old	0.938
							1072160az1_77_Zrn	5.2373	0.1209	0.3292	0.0113		1858.71	119.19	1834.32	72.88	1888.06	51.50	1888.058	51.503	2.728	2.846		old	2.846
							1072160az1_78_Zrn	3.8251	0.1551	0.2707	0.0143		1598.03	151.64	1544.22	91.56	1669.75	86.88	1669.749	86.876	5.203	7.518		old	7.518
							1072160az1_79_Zrn	0.8176	0.0199	0.0983	0.0034		606.70	20.12	604.70	21.81	611.06	64.06	604.696	21.807	3.606	1.042		old	1.042
							1072160az1_80_Zrn	4.3878	0.1030	0.3016	0.0104		1710.05	101.99	1699.21	66.80	1722.97	53.18	1722.967	53.179	3.086	1.379		old	1.379
							1072160az1_81_Zrn	4.9788	0.1149	0.3183	0.0110		1815.73	113.46	1781.28	70.49	1856.42	51.74	1856.425	51.738	2.787	4.048		old	4.048
							1072160az1_82_Zrn	4.7599	0.1168	0.3109	0.0111		1777.86	115.25	1744.97	71.40	1836.90	54.37	1836.901	54.368	2.960	5.005		old	5.005
							1072160az1_83_Zrn	0.0898	0.0030	0.0125	0.0004		87.32	3.00	79.81	2.80	285.42	84.72	79.814	2.801	3.510	72.036		young	0.000
							1072160az1_84_Zrn	5.5960	0.1301	0.3475	0.0120		1915.49	128.02	1922.57	76.99	1908.46	51.66	1908.455	51.658	2.707	-0.740		old	-0.740
							1072160az1_85_Zrn	4.8080	0.1115	0.3137	0.0108		1786.31	110.20	1758.70	69.62	1820.04	52.13	1820.041	52.134	2.864	3.371		old	3.371
							1072160az1_86_Zrn	4.6877	0.1250	0.2984	0.0110		1765.05	123.07	1683.31	70.68	1864.30	54.76	1864.303	54.759	2.937	9.708		old	9.708
							1072160az1_87_Zrn	0.0895	0.0037	0.0126	0.0004		87.00	3.72	80.59	2.87	266.67	101.75	80.585	2.869	3.561	69.780		young	0.000
							1072160az1_88_Zrn	0.6482	0.0152	0.0810	0.0028		507.35	15.38	502.12	17.96	531.17	63.28	502.123	17.965	3.578	5.468		old	5.468
							1072160az1_89_Zrn	3.1476	0.0729	0.2492	0.0086		1444.41	72.66	1434.38	55.16	1458.71	54.51	1458.711	54.505	3.737	1.668		old	1.668
							1072160az1_90_Zrn	5.8922	0.1355	0.3528	0.0121		1960.09	133.15	1948.15	77.99	1971.97	50.91	1971.974	50.912	2.582	1.208		old	1.208
							1072160az1_91_Zrn	5.2370	0.1240	0.3315	0.0115		1858.66	122.19	1845.48	74.04	1875.09	52.41	1875.089	52.413	2.795	1.579		old	1.579
							1072160az1_92_Zrn	1.7872	0.0426	0.1736	0.0061		1040.79	42.76	1031.90	38.98	1054.85	58.82	1054.845	58.825	5.577	2.176		old	2.176
							1072160az1_93_Zrn	3.6467	0.0857	0.2720	0.0094		1559.80	85.19	1551.07	60.55	1571.77	54.20	1571.769	54.196	3.448	1.317		old	1.317
							1072160az1_94_Zrn	4.4198	0.1072	0.2978	0.0105		1716.06	106.07	1680.64	67.60	1764.81	53.47	1764.812	53.474	3.030	4.770		old	4.770
							1072160az1_95_Zrn	3.2182	0.0809	0.2575	0.0090		1461.54	80.57	1476.79	57.71	1435.22	57.93	1435.218	57.928	4.036	-2.896		old	-2.896
							1072160az1_96_Zrn	4.7574	0.1137	0.3160	0.0110		1777.42	112.33	1770.10	70.95	1785.74	52.60	1785.737	52.599	2.946	0.876		old	0.876
							1072160az1_97_Zrn	1.7228	0.0403	0.1707	0.0059		1017.05	40.55	1016.10	37.97	1017.13	58.52	1017.127	58.519	5.753	0.101		old	0.101
							1072160az1_98_Zrn	3.4575	0.0815	0.2651	0.0092		1517.58	81.08	1515.70	59.06	1520.45	54.64	1520.454	54.636	3.593	0.313		old	0.313
							1072160az1_99_Zrn	5.6130	0.1340	0.3378	0.0118		1918.10	131.72	1876.21	75.85	1959.86	52.13	1959.862	52.134	2.660	4.268		old	4.268
							1072160az1_100_Zrn	undefined	undefined	undefined	undefined		undefined	undefined	undefined	undefined	undefined	undefined	undefined	undefined	#VALUE!	#VALUE!	#VALUE!	old	#VALUE!	#VALUE!	#VALUE!
							1072160az1_101_Zrn	0.8166	0.0215	0.0968	0.0034		606.13	21.76	595.81	21.67	633.79	67.44	595.812	21.668	3.637	5.992		old	5.992
							1072160az1_102_Zrn	5.3076	0.1244	0.3359	0.0116		1870.09	122.51	1866.72	74.68	1871.83	52.13	1871.832	52.128	2.785	0.273		old	0.273
							1072160az1_103_Zrn	4.6933	0.1085	0.3081	0.0106		1766.04	107.30	1731.17	68.27	1809.76	52.06	1809.762	52.057	2.876	4.343		old	4.343
							1072160az1_104_Zrn	0.5872	0.0139	0.0748	0.0026		469.05	14.10	465.20	16.61	482.33	64.36	465.204	16.615	3.571	3.551		old	3.551
							1072160az1_105_Zrn	4.1164	0.0956	0.2913	0.0100		1657.56	94.87	1648.03	64.61	1671.88	53.17	1671.880	53.169	3.180	1.427		old	1.427
							1072160az1_106_Zrn	2.0440	0.0487	0.1922	0.0066		1130.29	48.82	1133.50	42.74	1124.33	58.19	1124.327	58.191	5.176	-0.815		old	-0.815
							1072160az1_107_Zrn	5.0696	0.1212	0.3197	0.0112		1831.04	119.49	1788.41	72.12	1884.63	52.62	1884.626	52.624	2.792	5.106		old	5.106
							1072160az1_108_Zrn	1.3689	0.0322	0.1444	0.0050		875.71	32.44	869.34	32.11	895.08	59.84	869.341	32.114	3.694	2.875		old	2.875
							1072160az1_109_Zrn	4.7520	0.1104	0.3100	0.0107		1776.46	109.16	1740.64	68.98	1821.88	52.23	1821.878	52.226	2.867	4.459		old	4.459
							1072160az1_110_Zrn	3.2384	0.0746	0.2513	0.0087		1466.41	74.38	1445.32	55.65	1497.71	54.07	1497.706	54.072	3.610	3.498		old	3.498
40	U36	61	AFT 240710-03	1072-165	6.5388340	-72.3787180																						1188298	1214832	0.0000	0.0000		103	4	1	0	Barco	Early Paleocene		Early Paleocene	Early Paleocene - Middle Paleocene	Early Paleocene - Middle Paleocene	3	3	This work
							1072165az1_1_Zrn	1.6458	0.0538	0.1601	0.0073		987.93	53.95	957.60	47.04	1049.34	79.67	957.602	47.038	4.912	8.742		old	8.742
							1072165az1_2_Zrn	4.6306	0.1413	0.3112	0.0142		1754.80	138.65	1746.56	90.94	1765.27	68.90	1765.271	68.896	3.903	1.060		old	1.060
							1072165az1_3_Zrn	2.7725	0.0843	0.2298	0.0104		1348.15	83.86	1333.48	67.10	1371.52	72.32	1371.515	72.315	5.273	2.773		old	2.773
							1072165az1_4_Zrn	3.5022	0.1067	0.2639	0.0120		1527.72	105.52	1509.65	77.07	1554.60	70.63	1554.604	70.627	4.543	2.891		old	2.891
							1072165az1_5_Zrn	undefined	undefined	undefined	undefined		undefined	undefined	undefined	undefined	undefined	undefined	undefined	undefined	#VALUE!	#VALUE!	#VALUE!	old	#VALUE!	#VALUE!	#VALUE!
							1072165az1_6_Zrn	2.8988	0.0897	0.2352	0.0107		1381.61	89.09	1361.53	68.88	1411.35	72.79	1411.355	72.794	5.158	3.530		old	3.530
							1072165az1_7_Zrn	2.9805	0.0910	0.2430	0.0110		1402.65	90.32	1402.39	70.96	1403.68	72.16	1403.678	72.157	5.141	0.091		old	0.091
							1072165az1_8_Zrn	3.2199	0.0988	0.2479	0.0113		1461.97	97.96	1427.72	72.80	1511.99	71.50	1511.987	71.504	4.729	5.573		old	5.573
							1072165az1_9_Zrn	5.7094	0.1740	0.3507	0.0159		1932.78	169.38	1938.14	102.25	1930.98	67.39	1930.976	67.394	3.490	-0.371		old	-0.371
							1072165az1_10_Zrn	4.5400	0.1389	0.3062	0.0139		1738.34	136.37	1721.86	89.47	1756.64	69.08	1756.642	69.075	3.932	1.980		old	1.980
							1072165az1_11_Zrn	4.2698	0.1308	0.2911	0.0133		1687.55	128.65	1646.79	85.21	1742.56	69.29	1742.563	69.289	3.976	5.496		old	5.496
							1072165az1_12_Zrn	1.6472	0.0503	0.1633	0.0074		988.48	50.43	974.91	47.80	1017.59	76.33	974.909	47.799	4.903	4.194		old	4.194
							1072165az1_13_Zrn	3.2636	0.1049	0.2464	0.0112		1472.43	103.81	1419.95	72.32	1546.08	73.37	1546.082	73.374	4.746	8.158		old	8.158
							1072165az1_14_Zrn	3.2804	0.1019	0.2547	0.0116		1476.41	100.91	1462.91	74.46	1490.42	72.20	1490.423	72.196	4.844	1.846		old	1.846
							1072165az1_15_Zrn	4.4348	0.1354	0.3039	0.0138		1718.87	133.05	1710.61	88.72	1727.72	69.21	1727.722	69.213	4.006	0.991		old	0.991
							1072165az1_16_Zrn	3.0230	0.0922	0.2409	0.0110		1413.43	91.56	1391.21	70.40	1447.84	71.75	1447.837	71.748	4.956	3.911		old	3.911
							1072165az1_17_Zrn	3.0807	0.0972	0.2409	0.0111		1427.90	96.40	1391.38	71.60	1489.00	73.08	1488.999	73.083	4.908	6.556		old	6.556
							1072165az1_18_Zrn	5.1621	0.1571	0.3266	0.0148		1846.40	153.55	1821.76	95.21	1874.10	67.80	1874.103	67.801	3.618	2.793		old	2.793
							1072165az1_19_Zrn	4.6768	0.2812	0.3068	0.0139		1763.11	267.18	1724.71	89.43	1805.22	114.66	1805.222	114.665	6.352	4.460		old	4.460
							1072165az1_20_Zrn	5.0546	0.1540	0.3245	0.0148		1828.52	150.61	1811.48	94.74	1849.73	68.07	1849.729	68.071	3.680	2.068		old	2.068
							1072165az1_21_Zrn	5.5732	0.1708	0.3366	0.0153		1911.96	166.45	1870.23	98.33	1954.84	67.52	1954.836	67.524	3.454	4.328		old	4.328
							1072165az1_22_Zrn	1.8013	0.0551	0.1742	0.0079		1045.93	55.21	1035.06	50.94	1070.33	75.80	1070.334	75.800	7.082	3.295		old	3.295
							1072165az1_23_Zrn	1.6341	0.0502	0.1652	0.0075		983.43	50.30	985.40	48.30	977.22	77.03	985.397	48.295	4.901	-0.837		old	-0.837
							1072165az1_24_Zrn	0.8661	0.0303	0.0963	0.0044		633.45	30.58	592.82	28.46	778.71	87.09	592.824	28.462	4.801	23.871		old	23.871
							1072165az1_25_Zrn	2.6563	0.0824	0.2235	0.0102		1316.40	81.96	1300.39	65.40	1342.84	73.57	1342.838	73.565	5.478	3.161		old	3.161
							1072165az1_26_Zrn	4.2485	0.1310	0.2920	0.0133		1683.44	128.81	1651.28	85.56	1726.75	69.69	1726.749	69.686	4.036	4.370		old	4.370
							1072165az1_27_Zrn	4.6822	0.1432	0.3111	0.0141		1764.07	140.43	1745.94	90.75	1788.41	68.72	1788.415	68.724	3.843	2.375		old	2.375
							1072165az1_28_Zrn	0.3792	0.0123	0.0522	0.0024		326.44	12.40	328.13	15.31	306.65	89.04	328.133	15.310	4.666	-7.005		old	-7.005		disc. inv
							1072165az1_29_Zrn	5.4886	0.1676	0.3373	0.0153		1898.82	163.47	1873.44	98.49	1924.99	67.60	1924.989	67.597	3.512	2.678		old	2.678
							1072165az1_30_Zrn	4.1525	0.1270	0.2885	0.0131		1664.70	124.98	1634.27	84.42	1706.59	69.48	1706.595	69.478	4.071	4.238		old	4.238
							1072165az1_31_Zrn	3.9530	0.1206	0.2861	0.0130		1624.61	118.89	1622.22	83.55	1625.03	70.06	1625.033	70.065	4.312	0.173		old	0.173
							1072165az1_32_Zrn	undefined	undefined	undefined	undefined		undefined	undefined	undefined	undefined	undefined	undefined	undefined	undefined	#VALUE!	#VALUE!	#VALUE!	old	#VALUE!	#VALUE!	#VALUE!
							1072165az1_33_Zrn	4.5353	0.1382	0.3065	0.0139		1737.47	135.72	1723.37	89.44	1754.36	68.88	1754.360	68.881	3.926	1.767		old	1.767
							1072165az1_34_Zrn	4.5352	0.1400	0.3046	0.0139		1737.46	137.43	1714.06	89.16	1764.82	69.39	1764.820	69.390	3.932	2.876		old	2.876
							1072165az1_35_Zrn	6.4723	0.1982	0.3736	0.0170		2042.15	191.90	2046.39	109.17	2035.53	66.88	2035.526	66.879	3.286	-0.534		old	-0.534
							1072165az1_36_Zrn	4.2055	0.1312	0.2903	0.0134		1675.10	129.06	1643.00	85.83	1749.95	70.09	1749.954	70.089	4.005	6.112		old	6.112
							1072165az1_37_Zrn	2.3475	0.0722	0.2127	0.0097		1226.80	72.03	1242.97	62.16	1201.59	74.61	1201.587	74.608	6.209	-3.444		old	-3.444
							1072165az1_38_Zrn	2.4642	0.0754	0.2145	0.0098		1261.59	75.19	1252.99	62.77	1276.25	73.63	1276.247	73.626	5.769	1.822		old	1.822
							1072165az1_39_Zrn	0.0822	0.0027	0.0120	0.0006		80.21	2.75	77.08	3.56	173.90	92.68	77.085	3.560	4.618	55.673		young	0.000
							1072165az1_40_Zrn	0.9785	0.0303	0.1139	0.0052		692.83	30.54	695.43	33.39	684.12	81.19	695.427	33.393	4.802	-1.653		old	-1.653
							1072165az1_41_Zrn	4.4478	0.1362	0.3007	0.0137		1721.29	133.76	1694.97	87.87	1752.37	69.11	1752.373	69.114	3.944	3.276		old	3.276
							1072165az1_42_Zrn	3.2063	0.0985	0.2502	0.0114		1458.68	97.58	1439.59	73.21	1487.61	71.65	1487.612	71.647	4.816	3.228		old	3.228
							1072165az1_43_Zrn	1.3544	0.0416	0.1445	0.0066		869.44	41.81	869.85	42.28	864.29	78.43	869.855	42.277	4.860	-0.644		old	-0.644
							1072165az1_44_Zrn	4.6247	0.1425	0.3129	0.0142		1753.74	139.75	1755.04	91.51	1752.09	69.46	1752.087	69.461	3.964	-0.169		old	-0.169
							1072165az1_45_Zrn	3.2372	0.0996	0.2535	0.0115		1466.11	98.68	1456.68	74.20	1478.05	71.86	1478.048	71.857	4.862	1.446		old	1.446
							1072165az1_46_Zrn	2.9368	0.0924	0.2327	0.0106		1391.45	91.71	1348.75	68.47	1454.85	73.24	1454.850	73.242	5.034	7.293		old	7.293
							1072165az1_47_Zrn	2.4153	0.0741	0.2121	0.0097		1247.17	73.83	1239.89	62.11	1260.18	73.84	1260.184	73.842	5.860	1.611		old	1.611
							1072165az1_48_Zrn	5.8154	0.1790	0.3445	0.0157		1948.71	174.04	1908.11	100.98	1996.21	67.41	1996.206	67.412	3.377	4.413		old	4.413
							1072165az1_49_Zrn	3.0544	0.0946	0.2450	0.0111		1421.35	93.83	1412.38	71.65	1428.21	72.67	1428.207	72.673	5.088	1.108		old	1.108
							1072165az1_50_Zrn	undefined	undefined	undefined	undefined		undefined	undefined	undefined	undefined	undefined	undefined	undefined	undefined	#VALUE!	#VALUE!	#VALUE!	old	#VALUE!	#VALUE!	#VALUE!
							1072165az1_51_Zrn	3.3026	0.1009	0.2552	0.0116		1481.66	99.95	1465.02	74.58	1503.02	71.29	1503.025	71.286	4.743	2.529		old	2.529
							1072165az1_52_Zrn	0.8105	0.0254	0.0997	0.0045		602.71	25.58	612.70	29.24	559.49	83.49	612.698	29.241	4.773	-9.509		old	-9.509		disc. inv
							1072165az1_53_Zrn	2.9021	0.0887	0.2350	0.0107		1382.46	88.14	1360.46	68.65	1417.80	72.10	1417.799	72.102	5.085	4.045		old	4.045
							1072165az1_54_Zrn	5.5924	0.1703	0.3428	0.0156		1914.93	165.98	1899.89	99.99	1931.12	67.40	1931.124	67.402	3.490	1.617		old	1.617
							1072165az1_55_Zrn	4.5103	0.1371	0.3054	0.0139		1732.87	134.65	1718.27	89.08	1752.38	68.77	1752.378	68.770	3.924	1.947		old	1.947
							1072165az1_56_Zrn	1.4913	0.0455	0.1534	0.0070		926.84	45.66	919.88	44.86	945.92	77.06	919.885	44.864	4.877	2.753		old	2.753
							1072165az1_57_Zrn	2.6501	0.0908	0.2182	0.0109		1314.66	90.16	1272.58	70.01	1383.88	80.21	1383.880	80.205	5.796	8.042		old	8.042
							1072165az1_58_Zrn	2.0275	0.0675	0.1864	0.0086		1124.79	67.44	1101.73	55.01	1157.41	79.51	1157.409	79.507	6.869	4.811		old	4.811
							1072165az1_59_Zrn	3.1498	0.0978	0.2475	0.0113		1444.95	96.95	1425.74	72.52	1474.98	72.37	1474.979	72.368	4.906	3.338		old	3.338
							1072165az1_60_Zrn	3.2455	0.0989	0.2534	0.0115		1468.10	98.06	1456.20	74.04	1485.19	71.33	1485.189	71.333	4.803	1.952		old	1.952
							1072165az1_61_Zrn	3.3906	0.1036	0.2650	0.0120		1502.22	102.56	1515.41	77.42	1481.37	71.48	1481.374	71.477	4.825	-2.297		old	-2.297
							1072165az1_62_Zrn	0.6647	0.0216	0.0830	0.0038		517.46	21.83	513.89	24.46	530.41	86.16	513.887	24.458	4.759	3.115		old	3.115
							1072165az1_63_Zrn	undefined	undefined	undefined	undefined		undefined	undefined	undefined	undefined	undefined	undefined	undefined	undefined	#VALUE!	#VALUE!	#VALUE!	old	#VALUE!	#VALUE!	#VALUE!
							1072165az1_64_Zrn	4.4515	0.1354	0.3010	0.0137		1721.97	133.06	1696.14	87.85	1752.25	68.83	1752.247	68.829	3.928	3.202		old	3.202
							1072165az1_65_Zrn	undefined	undefined	undefined	undefined		undefined	undefined	undefined	undefined	undefined	undefined	undefined	undefined	#VALUE!	#VALUE!	#VALUE!	old	#VALUE!	#VALUE!	#VALUE!
							1072165az1_66_Zrn	4.7181	0.1435	0.3147	0.0143		1770.46	140.73	1763.78	91.78	1777.82	68.57	1777.821	68.570	3.857	0.790		old	0.790
							1072165az1_67_Zrn	3.2292	0.0987	0.2472	0.0112		1464.18	97.82	1423.88	72.30	1519.47	71.16	1519.470	71.161	4.683	6.291		old	6.291
							1072165az1_68_Zrn	1.4423	0.0444	0.1486	0.0068		906.67	44.62	893.12	43.57	928.32	77.86	893.123	43.571	4.879	3.792		old	3.792
							1072165az1_69_Zrn	3.3040	0.1004	0.2546	0.0116		1481.99	99.47	1462.03	74.32	1509.42	70.95	1509.420	70.947	4.700	3.140		old	3.140
							1072165az1_70_Zrn	2.8329	0.0863	0.2346	0.0107		1364.29	85.84	1358.45	68.53	1376.20	72.35	1376.205	72.347	5.257	1.290		old	1.290
							1072165az1_71_Zrn	2.4159	0.0756	0.2159	0.0098		1247.35	75.38	1260.07	63.21	1220.05	75.35	1220.050	75.348	6.176	-3.280		old	-3.280
							1072165az1_72_Zrn	0.7386	0.0227	0.0891	0.0041		561.61	22.92	550.24	26.09	607.51	81.79	550.235	26.092	4.742	9.428		old	9.428
							1072165az1_73_Zrn	3.4798	0.1059	0.2625	0.0119		1522.64	104.78	1502.84	76.69	1551.10	70.64	1551.104	70.637	4.554	3.112		old	3.112
							1072165az1_74_Zrn	3.1342	0.0958	0.2484	0.0113		1441.14	94.99	1430.07	72.58	1455.85	71.74	1455.849	71.745	4.928	1.771		old	1.771
							1072165az1_75_Zrn	3.2908	0.1039	0.2495	0.0116		1478.88	102.85	1435.70	74.43	1540.07	72.86	1540.066	72.862	4.731	6.776		old	6.776
							1072165az1_76_Zrn	2.4903	0.0764	0.2173	0.0099		1269.23	76.09	1267.42	63.60	1268.98	73.81	1268.978	73.805	5.816	0.123		old	0.123
							1072165az1_77_Zrn	3.4351	0.1045	0.2617	0.0119		1512.46	103.38	1498.54	76.40	1530.58	70.75	1530.585	70.747	4.622	2.094		old	2.094
							1072165az1_78_Zrn	3.8235	0.1166	0.2790	0.0127		1597.70	115.09	1586.47	81.50	1611.48	70.19	1611.478	70.187	4.355	1.552		old	1.552
							1072165az1_79_Zrn	3.4158	0.1054	0.2573	0.0117		1508.04	104.29	1476.23	75.47	1563.67	71.19	1563.674	71.193	4.553	5.593		old	5.593
							1072165az1_80_Zrn	3.7394	0.1199	0.2716	0.0124		1579.84	118.25	1548.90	79.79	1621.40	72.51	1621.399	72.510	4.472	4.471		old	4.471
							1072165az1_81_Zrn	4.2206	0.1292	0.2926	0.0133		1678.04	127.16	1654.68	85.64	1704.04	69.47	1704.043	69.470	4.077	2.897		old	2.897
							1072165az1_82_Zrn	2.0095	0.0619	0.1897	0.0086		1118.71	61.94	1119.75	55.61	1115.70	75.63	1115.703	75.627	6.778	-0.362		old	-0.362
							1072165az1_83_Zrn	2.6295	0.0803	0.2239	0.0102		1308.92	79.98	1302.46	65.53	1316.61	73.00	1316.615	73.001	5.545	1.075		old	1.075
							1072165az1_84_Zrn	2.6670	0.0829	0.2286	0.0104		1319.35	82.50	1327.21	67.13	1308.13	74.01	1308.129	74.006	5.657	-1.459		old	-1.459
							1072165az1_85_Zrn	4.5454	0.1399	0.3055	0.0139		1739.32	137.31	1718.73	89.52	1763.49	69.16	1763.493	69.165	3.922	2.538		old	2.538
							1072165az1_86_Zrn	4.8985	0.1496	0.3186	0.0145		1802.00	146.48	1782.85	93.01	1823.67	68.37	1823.668	68.374	3.749	2.238		old	2.238
							1072165az1_87_Zrn	4.5472	0.1389	0.3078	0.0140		1739.65	136.36	1729.89	89.96	1748.09	68.99	1748.087	68.993	3.947	1.041		old	1.041
							1072165az1_88_Zrn	0.2557	0.0080	0.0374	0.0017		231.22	8.12	236.61	10.98	174.30	89.22	236.607	10.984	4.642	-35.743		young	0.000
							1072165az1_89_Zrn	3.3238	0.1018	0.2590	0.0118		1486.67	100.83	1484.52	75.66	1488.16	71.47	1488.156	71.469	4.803	0.245		old	0.245
							1072165az1_90_Zrn	3.6752	0.1132	0.2766	0.0126		1565.99	111.77	1574.27	80.99	1552.95	71.21	1552.945	71.206	4.585	-1.373		old	-1.373
							1072165az1_91_Zrn	2.2498	0.0687	0.2016	0.0092		1196.72	68.60	1183.94	58.98	1216.54	74.11	1216.544	74.107	6.092	2.680		old	2.680
							1072165az1_92_Zrn	0.0879	0.0031	0.0128	0.0006		85.57	3.14	82.06	3.82	173.11	96.57	82.061	3.822	4.657	52.595		young	0.000
							1072165az1_93_Zrn	0.0860	0.0046	0.0121	0.0006		83.81	4.65	77.46	3.68	263.82	131.95	77.462	3.684	4.756	70.639		young	0.000
							1072165az1_94_Zrn	4.0733	0.1247	0.2877	0.0131		1648.97	122.81	1630.01	84.18	1671.89	69.80	1671.890	69.797	4.175	2.505		old	2.505
							1072165az1_95_Zrn	2.5535	0.0785	0.2203	0.0100		1287.43	78.18	1283.56	64.55	1294.27	73.56	1294.269	73.559	5.683	0.828		old	0.828
							1072165az1_96_Zrn	0.7913	0.0251	0.0956	0.0043		591.90	25.30	588.31	27.96	599.37	83.42	588.306	27.960	4.753	1.846		old	1.846
							1072165az1_97_Zrn	2.8924	0.0899	0.2379	0.0108		1379.92	89.25	1375.64	69.66	1391.06	73.10	1391.060	73.104	5.255	1.108		old	1.108
							1072165az1_98_Zrn	3.3397	0.1022	0.2585	0.0118		1490.39	101.19	1482.35	75.64	1504.30	71.27	1504.305	71.267	4.738	1.459		old	1.459
							1072165az1_99_Zrn	1.8188	0.0557	0.1762	0.0080		1052.25	55.76	1046.19	51.60	1062.63	75.95	1062.633	75.954	7.148	1.548		old	1.548
							1072165az1_100_Zrn	3.2164	0.1034	0.2525	0.0116		1461.11	102.32	1451.41	74.31	1475.48	73.97	1475.480	73.974	5.014	1.631		old	1.631
							1072165az1_101_Zrn	0.0722	0.0029	0.0101	0.0005		70.75	2.90	64.59	3.03	275.19	104.07	64.594	3.029	4.689	76.527		young	0.000
							1072165az1_102_Zrn	2.9673	0.0919	0.2452	0.0112		1399.30	91.23	1413.44	71.79	1380.62	73.13	1380.618	73.126	5.297	-2.377		old	-2.377
							1072165az1_103_Zrn	2.8408	0.1008	0.2240	0.0104		1366.38	99.88	1302.96	66.58	1457.03	79.80	1457.031	79.802	5.477	10.574		old	10.574
							1072165az1_104_Zrn	1.5967	0.0488	0.1604	0.0073		968.94	48.99	959.23	46.96	990.54	76.71	959.228	46.962	4.896	3.161		old	3.161
							1072165az1_105_Zrn	3.3513	0.1021	0.2589	0.0118		1493.10	101.14	1484.10	75.71	1505.07	71.15	1505.066	71.151	4.727	1.393		old	1.393
							1072165az1_106_Zrn	4.5932	0.1399	0.3096	0.0141		1748.03	137.34	1738.86	90.37	1760.85	68.80	1760.849	68.795	3.907	1.249		old	1.249
							1072165az1_107_Zrn	4.6179	0.1408	0.3081	0.0140		1752.52	138.16	1731.15	89.95	1775.80	68.71	1775.796	68.715	3.870	2.514		old	2.514
							1072165az1_108_Zrn	3.3292	0.1021	0.2591	0.0118		1487.92	101.11	1485.32	75.76	1493.01	71.50	1493.011	71.496	4.789	0.515		old	0.515
							1072165az1_109_Zrn	1.0937	0.0338	0.1250	0.0057		750.28	34.03	759.28	36.65	723.55	80.55	759.282	36.652	4.827	-4.938		old	-4.938
							1072165az1_110_Zrn	2.5748	0.0796	0.2176	0.0100		1293.51	79.30	1269.22	64.05	1334.87	73.45	1334.867	73.454	5.503	4.918		old	4.918
41	U37	62	AFT 240710-04	1072-166	6.5354980	-72.3704420																						1189215	1214466	0.0000	0.0000		99	1	0	0	Barco base	Early Paleocene		Early Paleocene	Early Paleocene	Early Paleocene	1	1	This work
							1072166az1_1_Zrn	3.6642	0.2873	0.2604	0.0226		1563.61	272.58	1491.92	145.03	1661.82	120.82	1661.821	120.819	7.270	10.224		old	10.224
							1072166az1_2_Zrn	undefined	undefined	undefined	undefined		undefined	undefined	undefined	undefined	undefined	undefined	undefined	undefined	#VALUE!	#VALUE!	#VALUE!	old	#VALUE!	#VALUE!	#VALUE!
							1072166az1_3_Zrn	1.8942	0.0607	0.1812	0.0083		1079.06	60.71	1073.59	53.10	1083.85	78.06	1083.847	78.064	7.203	0.946		old	0.946
							1072166az1_4_Zrn	undefined	undefined	undefined	undefined		undefined	undefined	undefined	undefined	undefined	undefined	undefined	undefined	#VALUE!	#VALUE!	#VALUE!	old	#VALUE!	#VALUE!	#VALUE!
							1072166az1_5_Zrn	1.8001	0.0550	0.1762	0.0080		1045.51	55.08	1046.23	51.48	1041.28	76.04	1041.282	76.038	7.302	-0.475		old	-0.475
							1072166az1_6_Zrn	3.0443	0.0927	0.2457	0.0112		1418.79	91.99	1416.34	71.74	1424.99	71.83	1424.992	71.827	5.040	0.607		old	0.607
							1072166az1_7_Zrn	4.5529	0.1385	0.3076	0.0140		1740.69	135.94	1728.99	89.72	1753.66	68.79	1753.664	68.791	3.923	1.407		old	1.407
							1072166az1_8_Zrn	undefined	undefined	undefined	undefined		undefined	undefined	undefined	undefined	undefined	undefined	undefined	undefined	#VALUE!	#VALUE!	#VALUE!	old	#VALUE!	#VALUE!	#VALUE!
							1072166az1_9_Zrn	5.1464	0.1577	0.3280	0.0149		1843.80	154.11	1828.72	95.73	1856.30	68.27	1856.302	68.275	3.678	1.486		old	1.486
							1072166az1_10_Zrn	1.7314	0.0578	0.1682	0.0077		1020.28	57.88	1001.96	49.46	1049.89	80.76	1049.891	80.761	7.692	4.565		old	4.565
							1072166az1_11_Zrn	2.8828	0.0880	0.2341	0.0106		1377.41	87.49	1355.69	68.36	1410.27	72.13	1410.270	72.134	5.115	3.870		old	3.870
							1072166az1_12_Zrn	3.0457	0.0933	0.2467	0.0112		1419.15	92.63	1421.59	72.12	1415.04	72.25	1415.044	72.251	5.106	-0.462		old	-0.462
							1072166az1_13_Zrn	3.1439	0.0958	0.2538	0.0115		1443.51	95.04	1457.84	74.08	1421.49	71.92	1421.492	71.921	5.060	-2.557		old	-2.557
							1072166az1_14_Zrn	3.0986	0.0950	0.2467	0.0112		1432.34	94.26	1421.55	72.08	1445.28	71.99	1445.285	71.989	4.981	1.642		old	1.642
							1072166az1_15_Zrn	4.1682	0.1378	0.2848	0.0138		1667.80	135.28	1615.32	88.90	1736.82	74.29	1736.816	74.291	4.277	6.995		old	6.995
							1072166az1_16_Zrn	2.8816	0.0888	0.2389	0.0109		1377.10	88.25	1381.09	69.79	1372.50	72.92	1372.503	72.918	5.313	-0.626		old	-0.626
							1072166az1_17_Zrn	2.6665	0.0812	0.2282	0.0104		1319.22	80.83	1325.31	66.65	1310.15	72.99	1310.146	72.993	5.571	-1.157		old	-1.157
							1072166az1_18_Zrn	4.6725	0.1422	0.3086	0.0140		1762.33	139.49	1733.60	90.03	1796.40	68.45	1796.398	68.449	3.810	3.496		old	3.496
							1072166az1_19_Zrn	4.6227	0.1407	0.3130	0.0142		1753.37	138.03	1755.26	91.25	1750.41	68.83	1750.415	68.829	3.932	-0.277		old	-0.277
							1072166az1_20_Zrn	3.3392	0.1020	0.2583	0.0117		1490.27	100.99	1480.96	75.42	1501.39	71.26	1501.394	71.257	4.746	1.361		old	1.361
							1072166az1_21_Zrn	2.9669	0.0915	0.2355	0.0107		1399.18	90.88	1363.18	69.10	1458.98	72.14	1458.980	72.142	4.945	6.566		old	6.566
							1072166az1_22_Zrn	4.6182	0.1417	0.3110	0.0141		1752.56	138.98	1745.67	90.88	1759.62	69.16	1759.616	69.156	3.930	0.792		old	0.792
							1072166az1_23_Zrn	undefined	undefined	undefined	undefined		undefined	undefined	undefined	undefined	undefined	undefined	undefined	undefined	#VALUE!	#VALUE!	#VALUE!	old	#VALUE!	#VALUE!	#VALUE!
							1072166az1_24_Zrn	2.7496	0.0860	0.2249	0.0104		1341.97	85.50	1307.46	66.84	1398.76	73.76	1398.760	73.763	5.273	6.527		old	6.527
							1072166az1_25_Zrn	4.7182	0.1437	0.3148	0.0143		1770.48	140.93	1764.47	91.94	1776.67	68.74	1776.669	68.741	3.869	0.687		old	0.687
							1072166az1_26_Zrn	4.6608	0.1441	0.3085	0.0141		1760.23	141.26	1733.47	90.37	1792.22	69.28	1792.224	69.279	3.866	3.279		old	3.279
							1072166az1_27_Zrn	0.0920	0.0035	0.0125	0.0006		89.33	3.54	80.40	3.70	320.43	99.56	80.398	3.697	4.598	74.910		young	0.000
							1072166az1_28_Zrn	4.1421	0.1270	0.2882	0.0131		1662.66	125.02	1632.47	84.48	1702.88	69.64	1702.877	69.638	4.089	4.134		old	4.134
							1072166az1_29_Zrn	undefined	undefined	undefined	undefined		undefined	undefined	undefined	undefined	undefined	undefined	undefined	undefined	#VALUE!	#VALUE!	#VALUE!	old	#VALUE!	#VALUE!	#VALUE!
							1072166az1_30_Zrn	4.5227	0.1380	0.3005	0.0137		1735.16	135.51	1693.98	87.87	1782.26	68.73	1782.256	68.733	3.857	4.953		old	4.953
							1072166az1_31_Zrn	2.5393	0.0802	0.2129	0.0099		1283.37	79.87	1244.49	63.74	1349.16	74.86	1349.164	74.861	5.549	7.759		old	7.759
							1072166az1_32_Zrn	3.1328	0.0960	0.2466	0.0112		1440.79	95.17	1420.78	72.11	1473.17	71.70	1473.166	71.699	4.867	3.556		old	3.556
							1072166az1_33_Zrn	undefined	undefined	undefined	undefined		undefined	undefined	undefined	undefined	undefined	undefined	undefined	undefined	#VALUE!	#VALUE!	#VALUE!	old	#VALUE!	#VALUE!	#VALUE!
							1072166az1_34_Zrn	4.6705	0.1422	0.3110	0.0141		1761.98	139.52	1745.74	90.76	1780.97	68.61	1780.974	68.611	3.852	1.978		old	1.978
							1072166az1_35_Zrn	5.0731	0.1554	0.3266	0.0149		1831.62	152.00	1821.73	95.53	1843.56	68.41	1843.559	68.414	3.711	1.184		old	1.184
							1072166az1_36_Zrn	3.5570	0.1544	0.2564	0.0138		1540.00	151.05	1471.63	88.63	1635.23	93.82	1635.230	93.815	5.737	10.005		old	10.005
							1072166az1_37_Zrn	undefined	undefined	undefined	undefined		undefined	undefined	undefined	undefined	undefined	undefined	undefined	undefined	#VALUE!	#VALUE!	#VALUE!	old	#VALUE!	#VALUE!	#VALUE!
							1072166az1_38_Zrn	5.7842	0.1764	0.3462	0.0157		1944.05	171.67	1916.55	101.05	1970.97	67.16	1970.973	67.162	3.408	2.761		old	2.761
							1072166az1_39_Zrn	3.9646	0.1302	0.2729	0.0129		1626.98	128.10	1555.56	83.10	1715.65	73.33	1715.649	73.332	4.274	9.331		old	9.331
							1072166az1_40_Zrn	4.3027	0.1313	0.3006	0.0137		1693.87	129.13	1694.18	87.73	1691.23	69.49	1691.229	69.487	4.109	-0.174		old	-0.174
							1072166az1_41_Zrn	3.0537	0.0935	0.2434	0.0111		1421.17	92.80	1404.18	71.16	1445.18	71.92	1445.182	71.917	4.976	2.837		old	2.837
							1072166az1_42_Zrn	4.9397	0.1509	0.3202	0.0145		1809.07	147.69	1790.51	93.40	1826.01	68.38	1826.011	68.381	3.745	1.944		old	1.944
							1072166az1_43_Zrn	3.3381	0.1026	0.2602	0.0118		1490.01	101.63	1490.93	76.10	1484.29	71.77	1484.291	71.769	4.835	-0.447		old	-0.447
							1072166az1_44_Zrn	3.0744	0.0961	0.2414	0.0110		1426.34	95.34	1393.79	70.67	1479.75	72.63	1479.747	72.629	4.908	5.809		old	5.809
							1072166az1_45_Zrn	4.3564	0.1329	0.3012	0.0137		1704.12	130.69	1697.30	87.97	1710.27	69.33	1710.271	69.330	4.054	0.759		old	0.759
							1072166az1_46_Zrn	2.1546	0.0741	0.1875	0.0089		1166.52	73.86	1107.99	57.53	1262.72	80.66	1262.724	80.661	6.388	12.254		old	12.254
							1072166az1_47_Zrn	3.3181	0.1014	0.2566	0.0117		1485.32	100.47	1472.55	74.97	1500.36	71.29	1500.363	71.294	4.752	1.854		old	1.854
							1072166az1_48_Zrn	2.3873	0.1444	0.2020	0.0142		1238.81	141.58	1185.84	91.12	1332.16	125.31	1332.160	125.308	9.406	10.984		old	10.984
							1072166az1_49_Zrn	4.6319	0.1411	0.3108	0.0141		1755.04	138.42	1744.58	90.67	1768.54	68.73	1768.543	68.733	3.886	1.355		old	1.355
							1072166az1_50_Zrn	4.5783	0.1413	0.3070	0.0141		1745.33	138.67	1725.81	90.31	1767.52	69.53	1767.518	69.527	3.934	2.359		old	2.359
							1072166az1_51_Zrn	3.1256	0.0962	0.2450	0.0112		1439.02	95.39	1412.74	71.74	1478.07	71.87	1478.069	71.871	4.863	4.420		old	4.420
							1072166az1_52_Zrn	4.4591	0.1385	0.3010	0.0138		1723.39	136.02	1696.27	88.67	1764.21	69.67	1764.208	69.673	3.949	3.851		old	3.851
							1072166az1_53_Zrn	4.5080	0.1375	0.3032	0.0138		1732.45	135.00	1707.14	88.59	1761.96	68.87	1761.959	68.872	3.909	3.111		old	3.111
							1072166az1_54_Zrn	4.6290	0.1414	0.3123	0.0142		1754.51	138.69	1752.07	91.08	1755.48	68.92	1755.479	68.922	3.926	0.194		old	0.194
							1072166az1_55_Zrn	4.3513	0.1327	0.2990	0.0136		1703.15	130.44	1686.45	87.32	1722.00	69.17	1721.996	69.171	4.017	2.064		old	2.064
							1072166az1_56_Zrn	3.3054	0.1016	0.2581	0.0117		1482.33	100.62	1479.94	75.36	1482.16	71.74	1482.163	71.740	4.840	0.150		old	0.150
							1072166az1_57_Zrn	5.5139	0.1677	0.3392	0.0154		1902.76	163.54	1882.93	98.94	1924.49	67.39	1924.490	67.387	3.502	2.160		old	2.160
							1072166az1_58_Zrn	2.5927	0.0792	0.2224	0.0101		1298.59	78.89	1294.59	65.01	1302.79	73.23	1302.791	73.234	5.621	0.629		old	0.629
							1072166az1_59_Zrn	3.8035	0.1934	0.2672	0.0180		1593.48	187.44	1526.54	115.70	1683.18	109.19	1683.183	109.189	6.487	9.306		old	9.306
							1072166az1_60_Zrn	5.2379	0.1605	0.3319	0.0151		1858.80	156.76	1847.50	97.19	1868.22	68.23	1868.222	68.228	3.652	1.109		old	1.109
							1072166az1_61_Zrn	4.5097	0.1378	0.3064	0.0139		1732.77	135.28	1723.20	89.48	1742.76	69.12	1742.761	69.122	3.966	1.123		old	1.123
							1072166az1_62_Zrn	4.6937	0.1428	0.3140	0.0143		1766.12	140.05	1760.60	91.57	1772.68	68.64	1772.679	68.636	3.872	0.682		old	0.682
							1072166az1_63_Zrn	2.9548	0.0902	0.2398	0.0109		1396.08	89.57	1385.66	70.06	1411.62	72.10	1411.624	72.103	5.108	1.839		old	1.839
							1072166az1_64_Zrn	1.6213	0.0501	0.1657	0.0075		978.51	50.27	988.35	48.46	955.69	77.64	988.352	48.464	4.904	-3.418		old	-3.418
							1072166az1_65_Zrn	2.9813	0.0945	0.2467	0.0113		1402.86	93.78	1421.33	72.34	1374.61	74.41	1374.612	74.407	5.413	-3.399		old	-3.399
							1072166az1_66_Zrn	2.8726	0.0874	0.2377	0.0108		1374.76	86.91	1374.63	69.40	1373.46	72.35	1373.463	72.352	5.268	-0.085		old	-0.085
							1072166az1_67_Zrn	4.3493	0.1327	0.2992	0.0136		1702.77	130.48	1687.22	87.36	1720.41	69.23	1720.409	69.228	4.024	1.929		old	1.929
							1072166az1_68_Zrn	undefined	undefined	undefined	undefined		undefined	undefined	undefined	undefined	undefined	undefined	undefined	undefined	#VALUE!	#VALUE!	#VALUE!	old	#VALUE!	#VALUE!	#VALUE!
							1072166az1_69_Zrn	2.7702	0.0850	0.2298	0.0105		1347.55	84.49	1333.60	67.23	1371.45	72.72	1371.449	72.722	5.303	2.759		old	2.759
							1072166az1_70_Zrn	6.2152	0.1894	0.3569	0.0162		2006.60	183.76	1967.31	104.22	2047.33	66.55	2047.328	66.551	3.251	3.909		old	3.909
							1072166az1_71_Zrn	4.8832	0.1488	0.3179	0.0144		1799.36	145.75	1779.26	92.80	1821.54	68.30	1821.541	68.305	3.750	2.321		old	2.321
							1072166az1_72_Zrn	2.6989	0.0828	0.2301	0.0105		1328.16	82.36	1334.90	67.26	1313.96	73.32	1313.955	73.315	5.580	-1.594		old	-1.594
							1072166az1_73_Zrn	4.4963	0.1377	0.3044	0.0139		1730.29	135.21	1713.19	89.02	1770.10	69.01	1770.097	69.008	3.899	3.215		old	3.215
							1072166az1_74_Zrn	4.6987	0.1434	0.3121	0.0142		1767.01	140.66	1751.03	91.14	1781.31	68.73	1781.305	68.731	3.858	1.699		old	1.699
							1072166az1_75_Zrn	4.4255	0.1347	0.3034	0.0138		1717.13	132.41	1708.02	88.55	1729.20	69.04	1729.203	69.042	3.993	1.225		old	1.225
							1072166az1_76_Zrn	4.7721	0.1457	0.3171	0.0144		1780.00	142.76	1775.73	92.57	1785.54	68.70	1785.539	68.697	3.847	0.550		old	0.550
							1072166az1_77_Zrn	2.9599	0.0901	0.2429	0.0110		1397.38	89.48	1401.53	70.90	1390.15	72.16	1390.151	72.160	5.191	-0.819		old	-0.819
							1072166az1_78_Zrn	4.5144	0.1379	0.3012	0.0137		1733.62	135.42	1697.17	88.04	1778.74	68.77	1778.737	68.773	3.866	4.585		old	4.585
							1072166az1_79_Zrn	4.6013	0.1411	0.3108	0.0141		1749.50	138.41	1744.47	90.83	1753.94	69.14	1753.938	69.142	3.942	0.540		old	0.540
							1072166az1_80_Zrn	2.9331	0.0900	0.2371	0.0108		1390.49	89.37	1371.41	69.44	1419.32	72.31	1419.319	72.313	5.095	3.375		old	3.375
							1072166az1_81_Zrn	4.5570	0.1391	0.3047	0.0139		1741.44	136.51	1714.74	89.00	1772.74	68.81	1772.742	68.810	3.882	3.272		old	3.272
							1072166az1_82_Zrn	4.6233	0.1412	0.3091	0.0140		1753.48	138.55	1736.15	90.21	1771.12	68.84	1771.119	68.840	3.887	1.974		old	1.974
							1072166az1_83_Zrn	3.9727	0.2091	0.2802	0.0183		1628.65	201.93	1592.20	117.17	1675.95	95.66	1675.952	95.664	5.708	4.997		old	4.997
							1072166az1_84_Zrn	5.7623	0.1754	0.3460	0.0157		1940.77	170.74	1915.34	100.93	1966.46	67.10	1966.460	67.098	3.412	2.599		old	2.599
							1072166az1_85_Zrn	undefined	undefined	undefined	undefined		undefined	undefined	undefined	undefined	undefined	undefined	undefined	undefined	#VALUE!	#VALUE!	#VALUE!	old	#VALUE!	#VALUE!	#VALUE!
							1072166az1_86_Zrn	3.0505	0.0953	0.2477	0.0113		1420.37	94.55	1426.80	72.52	1410.06	73.26	1410.058	73.262	5.196	-1.187		old	-1.187
							1072166az1_87_Zrn	4.8225	0.1478	0.3156	0.0143		1788.83	144.74	1767.97	92.12	1811.28	68.65	1811.276	68.646	3.790	2.391		old	2.391
							1072166az1_88_Zrn	3.0508	0.0947	0.2432	0.0111		1420.43	93.92	1403.20	71.26	1444.23	72.58	1444.230	72.579	5.025	2.841		old	2.841
							1072166az1_89_Zrn	3.1202	0.0951	0.2502	0.0114		1437.68	94.35	1439.68	73.10	1435.41	71.78	1435.406	71.781	5.001	-0.298		old	-0.298
							1072166az1_90_Zrn	2.5582	0.0793	0.2262	0.0103		1288.77	78.99	1314.62	66.19	1248.11	74.53	1248.108	74.531	5.971	-5.329		old	-5.329		disc. inv
							1072166az1_91_Zrn	4.9069	0.1498	0.3216	0.0146		1803.44	146.63	1797.39	93.85	1807.70	68.46	1807.704	68.465	3.787	0.570		old	0.570
							1072166az1_92_Zrn	3.3404	0.1020	0.2524	0.0115		1490.56	100.99	1451.06	73.87	1549.40	70.79	1549.398	70.793	4.569	6.347		old	6.347
							1072166az1_93_Zrn	4.5675	0.1392	0.3073	0.0140		1743.37	136.65	1727.35	89.74	1763.21	68.82	1763.207	68.822	3.903	2.033		old	2.033
							1072166az1_94_Zrn	2.6524	0.0817	0.2242	0.0102		1315.30	81.33	1304.01	65.69	1331.98	73.41	1331.983	73.406	5.511	2.100		old	2.100
							1072166az1_95_Zrn	2.6139	0.1256	0.2142	0.0129		1304.54	123.69	1251.04	82.83	1393.26	103.81	1393.260	103.814	7.451	10.207		old	10.207
							1072166az1_96_Zrn	3.2705	0.1001	0.2547	0.0116		1474.05	99.16	1462.47	74.53	1490.04	71.45	1490.038	71.451	4.795	1.850		old	1.850
							1072166az1_97_Zrn	2.9784	0.0917	0.2419	0.0110		1402.12	91.01	1396.61	70.80	1410.10	72.48	1410.098	72.480	5.140	0.956		old	0.956
							1072166az1_98_Zrn	5.8646	0.1784	0.3529	0.0160		1956.01	173.51	1948.22	102.85	1964.45	67.06	1964.449	67.061	3.414	0.826		old	0.826
							1072166az1_99_Zrn	4.1187	0.1332	0.2853	0.0134		1658.01	130.94	1618.22	86.14	1712.34	71.59	1712.339	71.588	4.181	5.497		old	5.497
							1072166az1_100_Zrn	17.5280	0.5798	0.5948	0.0276		2964.19	516.97	3008.77	176.94	2949.48	63.77	2949.479	63.771	2.162	-2.010		old	-2.010
							1072166az1_101_Zrn	3.3752	0.1033	0.2589	0.0118		1498.66	102.26	1484.43	75.73	1516.16	71.20	1516.158	71.200	4.696	2.092		old	2.092
							1072166az1_102_Zrn	3.0338	0.0927	0.2456	0.0112		1416.17	92.05	1415.81	71.79	1414.76	72.10	1414.764	72.102	5.096	-0.074		old	-0.074
							1072166az1_103_Zrn	5.8115	0.1771	0.3538	0.0161		1948.12	172.34	1952.63	103.25	1940.92	67.32	1940.923	67.316	3.468	-0.603		old	-0.603
							1072166az1_104_Zrn	4.6214	0.1408	0.3073	0.0140		1753.15	138.19	1727.65	89.77	1783.98	68.59	1783.981	68.591	3.845	3.158		old	3.158
							1072166az1_105_Zrn	3.4666	0.1168	0.2603	0.0124		1519.64	115.26	1491.37	79.38	1560.88	76.04	1560.882	76.038	4.871	4.453		old	4.453
							1072166az1_106_Zrn	undefined	undefined	undefined	undefined		undefined	undefined	undefined	undefined	undefined	undefined	undefined	undefined	#VALUE!	#VALUE!	#VALUE!	old	#VALUE!	#VALUE!	#VALUE!
							1072166az1_107_Zrn	4.7494	0.1446	0.3136	0.0142		1776.00	141.72	1758.24	91.50	1795.18	68.44	1795.179	68.440	3.812	2.058		old	2.058
							1072166az1_108_Zrn	3.1178	0.0958	0.2493	0.0113		1437.10	95.02	1434.61	72.93	1442.34	72.10	1442.339	72.097	4.999	0.536		old	0.536
							1072166az1_109_Zrn	4.1829	0.1277	0.2893	0.0132		1670.68	125.68	1638.23	84.62	1710.79	69.36	1710.788	69.364	4.054	4.241		old	4.241
							1072166az1_110_Zrn	2.6099	0.0808	0.2252	0.0103		1303.44	80.41	1309.44	66.02	1291.25	74.05	1291.246	74.046	5.734	-1.409		old	-1.409
42	U38	63	AFT 240710-05	1072-167	6.5351250	-72.3670370																						1189592	1214426	0.0000	0.0000		107	0	0	0	Guaduas tope	Early Paleocene		Early Paleocene	Early Paleocene	Early Paleocene	0	0	This work
							1072167az1_1_Zrn	2.5697	0.0787	0.2195	0.0100		1292.06	78.35	1278.98	64.11	1315.75	73.17	1315.753	73.167	5.561	2.795		old	2.795
							1072167az1_2_Zrn	1.5121	0.0510	0.1536	0.0070		935.29	51.11	921.34	45.15	958.91	82.39	921.345	45.148	4.900	3.918		old	3.918
							1072167az1_3_Zrn	2.5792	0.0789	0.2226	0.0101		1294.77	78.57	1295.36	65.03	1290.96	73.42	1290.964	73.416	5.687	-0.341		old	-0.341
							1072167az1_4_Zrn	3.2518	0.0987	0.2553	0.0116		1469.61	97.83	1465.90	74.46	1476.08	71.18	1476.082	71.181	4.822	0.690		old	0.690
							1072167az1_5_Zrn	4.6411	0.1413	0.3135	0.0142		1756.69	138.59	1757.88	91.44	1759.64	68.76	1759.636	68.759	3.908	0.100		old	0.100
							1072167az1_6_Zrn	undefined	undefined	undefined	undefined		undefined	undefined	undefined	undefined	undefined	undefined	undefined	undefined	#VALUE!	#VALUE!	#VALUE!	old	#VALUE!	#VALUE!	#VALUE!
							1072167az1_7_Zrn	3.2506	0.1001	0.2518	0.0115		1469.32	99.17	1447.82	73.69	1500.05	71.70	1500.052	71.700	4.780	3.482		old	3.482
							1072167az1_8_Zrn	3.1085	0.0945	0.2504	0.0114		1434.79	93.80	1440.71	73.11	1425.37	71.82	1425.375	71.817	5.038	-1.076		old	-1.076
							1072167az1_9_Zrn	3.2294	0.0985	0.2531	0.0115		1464.24	97.65	1454.39	73.90	1478.13	71.43	1478.129	71.430	4.832	1.606		old	1.606
							1072167az1_10_Zrn	2.2696	0.0732	0.1962	0.0092		1202.88	73.03	1154.69	59.01	1291.58	76.66	1291.576	76.656	5.935	10.598		old	10.598
							1072167az1_11_Zrn	2.6476	0.0808	0.2241	0.0102		1313.99	80.43	1303.48	65.46	1329.80	72.89	1329.802	72.894	5.482	1.979		old	1.979
							1072167az1_12_Zrn	4.7776	0.1454	0.3170	0.0144		1780.98	142.52	1774.96	92.45	1786.47	68.53	1786.473	68.532	3.836	0.645		old	0.645
							1072167az1_13_Zrn	3.1961	0.0973	0.2524	0.0115		1456.22	96.49	1450.65	73.62	1462.72	71.43	1462.717	71.433	4.884	0.825		old	0.825
							1072167az1_14_Zrn	3.4605	0.1072	0.2635	0.0120		1518.26	106.07	1507.62	77.11	1530.86	71.72	1530.857	71.716	4.685	1.518		old	1.518
							1072167az1_15_Zrn	3.5600	0.1081	0.2673	0.0121		1540.66	106.94	1527.33	78.00	1557.85	70.46	1557.850	70.465	4.523	1.959		old	1.959
							1072167az1_16_Zrn	1.4909	0.0465	0.1547	0.0070		926.70	46.69	927.49	45.29	920.33	78.58	927.486	45.292	4.883	-0.777		old	-0.777
							1072167az1_17_Zrn	2.5836	0.0789	0.2207	0.0100		1296.01	78.58	1285.35	64.48	1311.12	73.13	1311.121	73.135	5.578	1.966		old	1.966
							1072167az1_18_Zrn	4.9591	0.1520	0.3200	0.0145		1812.37	148.78	1789.63	93.45	1835.17	68.49	1835.171	68.489	3.732	2.482		old	2.482
							1072167az1_19_Zrn	4.3573	0.1334	0.2952	0.0135		1704.29	131.12	1667.43	86.47	1750.09	69.21	1750.089	69.206	3.954	4.723		old	4.723
							1072167az1_20_Zrn	2.6102	0.0794	0.2213	0.0101		1303.51	79.09	1288.92	64.68	1326.83	72.79	1326.827	72.789	5.486	2.857		old	2.857
							1072167az1_21_Zrn	3.0942	0.0954	0.2419	0.0111		1431.24	94.67	1396.40	71.32	1488.40	72.04	1488.401	72.040	4.840	6.181		old	6.181
							1072167az1_22_Zrn	3.3847	0.1033	0.2653	0.0121		1500.86	102.24	1516.88	77.47	1477.17	71.45	1477.171	71.452	4.837	-2.688		old	-2.688
							1072167az1_23_Zrn	2.6248	0.0801	0.2286	0.0104		1307.62	79.79	1327.19	66.79	1275.08	73.49	1275.084	73.486	5.763	-4.086		old	-4.086
							1072167az1_24_Zrn	3.2209	0.1002	0.2594	0.0118		1462.21	99.24	1487.01	75.95	1425.20	72.90	1425.199	72.901	5.115	-4.337		old	-4.337
							1072167az1_25_Zrn	2.6377	0.0804	0.2266	0.0103		1311.21	80.06	1316.59	66.14	1302.94	73.12	1302.938	73.116	5.612	-1.047		old	-1.047
							1072167az1_26_Zrn	3.0151	0.0954	0.2437	0.0111		1411.46	94.62	1405.89	71.40	1416.63	73.79	1416.632	73.791	5.209	0.758		old	0.758
							1072167az1_27_Zrn	4.5361	0.1383	0.3056	0.0139		1737.62	135.75	1719.09	89.20	1760.23	68.84	1760.227	68.840	3.911	2.337		old	2.337
							1072167az1_28_Zrn	1.6018	0.0502	0.1602	0.0073		970.92	50.33	958.11	47.01	996.30	77.94	958.114	47.011	4.907	3.833		old	3.833
							1072167az1_29_Zrn	1.6625	0.0510	0.1636	0.0074		994.32	51.15	976.65	47.89	1037.43	76.34	976.655	47.894	4.904	5.859		old	5.859
							1072167az1_30_Zrn	4.6106	0.1406	0.3082	0.0140		1751.18	137.93	1731.60	89.96	1774.24	68.74	1774.240	68.741	3.874	2.403		old	2.403
							1072167az1_31_Zrn	2.5033	0.0764	0.2153	0.0098		1273.00	76.12	1257.08	62.88	1300.72	73.18	1300.719	73.176	5.626	3.355		old	3.355
							1072167az1_32_Zrn	4.2217	0.1293	0.2956	0.0134		1678.26	127.20	1669.21	86.34	1686.63	69.71	1686.625	69.709	4.133	1.033		old	1.033
							1072167az1_33_Zrn	5.0100	0.1527	0.3248	0.0148		1821.01	149.43	1813.04	94.76	1829.51	68.25	1829.512	68.254	3.731	0.900		old	0.900
							1072167az1_34_Zrn	2.7353	0.0872	0.2239	0.0105		1338.11	86.68	1302.24	67.20	1397.21	74.94	1397.214	74.945	5.364	6.797		old	6.797
							1072167az1_35_Zrn	3.2813	0.1000	0.2551	0.0116		1476.63	99.09	1464.82	74.47	1494.54	71.21	1494.535	71.206	4.764	1.988		old	1.988
							1072167az1_36_Zrn	2.5922	0.0790	0.2218	0.0101		1298.44	78.66	1291.56	64.78	1309.24	73.02	1309.242	73.024	5.578	1.351		old	1.351
							1072167az1_37_Zrn	2.6016	0.0807	0.2183	0.0099		1301.09	80.29	1273.12	63.73	1345.78	73.44	1345.777	73.441	5.457	5.399		old	5.399
							1072167az1_38_Zrn	0.7924	0.0242	0.0956	0.0043		592.51	24.41	588.63	27.98	606.62	81.39	588.626	27.980	4.753	2.967		old	2.967
							1072167az1_39_Zrn	2.4615	0.0753	0.2145	0.0097		1260.81	75.08	1252.86	62.68	1274.79	73.57	1274.794	73.571	5.771	1.720		old	1.720
							1072167az1_40_Zrn	2.4288	0.0743	0.2145	0.0098		1251.17	74.05	1252.85	62.72	1246.33	73.89	1246.326	73.888	5.928	-0.524		old	-0.524
							1072167az1_41_Zrn	2.6190	0.0798	0.2251	0.0102		1305.99	79.44	1308.66	65.73	1299.63	73.11	1299.628	73.109	5.625	-0.695		old	-0.695
							1072167az1_42_Zrn	5.3231	0.1619	0.3350	0.0152		1872.58	158.08	1862.75	97.72	1882.86	67.72	1882.861	67.722	3.597	1.068		old	1.068
							1072167az1_43_Zrn	1.5654	0.0488	0.1607	0.0073		956.59	48.91	960.93	47.04	944.03	78.18	960.926	47.044	4.896	-1.790		old	-1.790
							1072167az1_44_Zrn	4.5583	0.1393	0.3048	0.0139		1741.68	136.72	1714.87	89.13	1773.01	68.89	1773.012	68.886	3.885	3.279		old	3.279
							1072167az1_45_Zrn	2.9936	0.0912	0.2413	0.0110		1405.99	90.54	1393.58	70.44	1424.53	71.85	1424.531	71.852	5.044	2.173		old	2.173
							1072167az1_46_Zrn	4.3957	0.1348	0.2965	0.0135		1711.53	132.43	1673.96	86.90	1757.72	69.17	1757.723	69.175	3.935	4.765		old	4.765
							1072167az1_47_Zrn	3.0406	0.0930	0.2430	0.0110		1417.88	92.27	1402.06	71.01	1440.37	71.90	1440.369	71.900	4.992	2.659		old	2.659
							1072167az1_48_Zrn	1.6580	0.0517	0.1655	0.0075		992.63	51.86	987.23	48.51	1008.23	77.48	987.233	48.507	4.913	2.083		old	2.083
							1072167az1_49_Zrn	3.6562	0.1411	0.2605	0.0137		1561.85	138.46	1492.43	87.71	1658.20	84.28	1658.203	84.282	5.083	9.997		old	9.997
							1072167az1_50_Zrn	2.8059	0.0854	0.2351	0.0107		1357.11	84.96	1360.98	68.64	1349.59	72.57	1349.586	72.570	5.377	-0.844		old	-0.844
							1072167az1_51_Zrn	1.9458	0.0603	0.1851	0.0085		1097.01	60.29	1094.85	54.50	1098.99	76.16	1098.985	76.156	6.930	0.376		old	0.376
							1072167az1_52_Zrn	4.6566	0.1422	0.3126	0.0142		1759.47	139.49	1753.60	91.31	1768.31	68.83	1768.305	68.833	3.893	0.832		old	0.832
							1072167az1_53_Zrn	2.8428	0.0869	0.2375	0.0108		1366.90	86.37	1373.43	69.41	1354.70	72.71	1354.696	72.712	5.367	-1.383		old	-1.383
							1072167az1_54_Zrn	3.0600	0.0960	0.2488	0.0114		1422.73	95.23	1432.50	72.98	1408.41	73.45	1408.411	73.452	5.215	-1.710		old	-1.710
							1072167az1_55_Zrn	0.7809	0.0288	0.0960	0.0044		585.99	29.02	591.06	28.33	559.34	93.61	591.057	28.331	4.793	-5.671		old	-5.671		disc. inv
							1072167az1_56_Zrn	3.9224	0.1203	0.2834	0.0129		1618.32	118.58	1608.56	82.83	1628.44	70.25	1628.444	70.252	4.314	1.221		old	1.221
							1072167az1_57_Zrn	3.3426	0.1035	0.2509	0.0115		1491.06	102.51	1443.29	73.76	1561.34	71.37	1561.338	71.370	4.571	7.561		old	7.561
							1072167az1_58_Zrn	2.5580	0.0792	0.2200	0.0100		1288.71	78.87	1282.07	64.37	1293.58	73.99	1293.584	73.987	5.720	0.890		old	0.890
							1072167az1_59_Zrn	2.7434	0.0835	0.2297	0.0104		1340.29	83.10	1332.84	67.08	1351.58	72.56	1351.575	72.563	5.369	1.386		old	1.386
							1072167az1_60_Zrn	4.5594	0.1388	0.3100	0.0141		1741.87	136.29	1740.50	90.40	1742.85	68.92	1742.848	68.915	3.954	0.134		old	0.134
							1072167az1_61_Zrn	4.7518	0.1449	0.3186	0.0145		1776.43	142.04	1782.95	93.03	1768.53	68.78	1768.527	68.781	3.889	-0.815		old	-0.815
							1072167az1_62_Zrn	4.5081	0.1372	0.3075	0.0140		1732.46	134.69	1728.42	89.69	1735.06	68.95	1735.065	68.947	3.974	0.383		old	0.383
							1072167az1_63_Zrn	4.8354	0.1489	0.3163	0.0144		1791.08	145.87	1771.50	92.63	1813.26	68.77	1813.263	68.767	3.792	2.303		old	2.303
							1072167az1_64_Zrn	3.0924	0.0956	0.2473	0.0113		1430.80	94.83	1424.75	72.44	1439.76	72.45	1439.760	72.452	5.032	1.043		old	1.043
							1072167az1_65_Zrn	3.4459	0.1051	0.2606	0.0118		1514.94	104.02	1493.06	76.15	1545.91	70.77	1545.908	70.767	4.578	3.419		old	3.419
							1072167az1_66_Zrn	4.3077	0.1317	0.2997	0.0136		1694.83	129.51	1689.88	87.54	1699.90	69.50	1699.896	69.501	4.089	0.589		old	0.589
							1072167az1_67_Zrn	4.5323	0.1380	0.3071	0.0139		1736.91	135.49	1726.25	89.59	1749.83	68.86	1749.834	68.863	3.935	1.348		old	1.348
							1072167az1_68_Zrn	3.6396	0.1116	0.2700	0.0123		1558.23	110.28	1541.00	78.88	1575.39	70.78	1575.386	70.775	4.493	2.183		old	2.183
							1072167az1_69_Zrn	4.4338	0.1353	0.3035	0.0138		1718.67	132.93	1708.84	88.57	1730.91	69.13	1730.911	69.125	3.994	1.275		old	1.275
							1072167az1_70_Zrn	3.1296	0.0957	0.2496	0.0113		1440.00	94.89	1436.45	72.83	1442.83	71.83	1442.833	71.831	4.978	0.442		old	0.442
							1072167az1_71_Zrn	4.5063	0.1531	0.2931	0.0141		1732.14	149.81	1657.12	90.79	1825.99	70.79	1825.990	70.791	3.877	9.248		old	9.248
							1072167az1_72_Zrn	2.8820	0.0889	0.2384	0.0108		1377.23	88.31	1378.41	69.74	1372.48	73.01	1372.482	73.007	5.319	-0.432		old	-0.432
							1072167az1_73_Zrn	3.0531	0.1001	0.2428	0.0111		1421.02	99.19	1401.22	71.17	1440.34	75.40	1440.343	75.397	5.235	2.716		old	2.716
							1072167az1_74_Zrn	3.3316	0.1027	0.2562	0.0117		1488.49	101.70	1470.59	75.07	1510.85	71.67	1510.851	71.670	4.744	2.665		old	2.665
							1072167az1_75_Zrn	4.3254	0.1320	0.2953	0.0134		1698.22	129.80	1668.07	86.26	1735.11	69.12	1735.107	69.122	3.984	3.863		old	3.863
							1072167az1_76_Zrn	4.4966	0.1368	0.3045	0.0138		1730.35	134.34	1713.49	88.84	1750.26	68.83	1750.256	68.829	3.933	2.101		old	2.101
							1072167az1_77_Zrn	3.0472	0.0934	0.2438	0.0111		1419.52	92.69	1406.57	71.20	1438.86	72.02	1438.864	72.022	5.005	2.245		old	2.245
							1072167az1_78_Zrn	3.4567	0.1054	0.2599	0.0118		1517.39	104.27	1489.25	75.96	1556.70	70.67	1556.701	70.675	4.540	4.333		old	4.333
							1072167az1_79_Zrn	3.0929	0.0946	0.2456	0.0112		1430.93	93.89	1415.76	71.83	1451.08	71.86	1451.080	71.859	4.952	2.434		old	2.434
							1072167az1_80_Zrn	2.8608	0.0880	0.2379	0.0108		1371.66	87.42	1375.60	69.61	1363.60	72.98	1363.602	72.978	5.352	-0.880		old	-0.880
							1072167az1_81_Zrn	1.5907	0.0497	0.1607	0.0073		966.56	49.85	960.75	47.09	976.07	78.00	960.754	47.092	4.902	1.569		old	1.569
							1072167az1_82_Zrn	3.1435	0.0963	0.2508	0.0114		1443.40	95.49	1442.74	73.26	1442.59	71.96	1442.588	71.962	4.988	-0.010		old	-0.010
							1072167az1_83_Zrn	2.5093	0.0766	0.2166	0.0098		1274.74	76.30	1263.77	63.34	1290.51	73.32	1290.506	73.320	5.681	2.072		old	2.072
							1072167az1_84_Zrn	3.2737	0.1001	0.2552	0.0116		1474.81	99.16	1465.30	74.59	1488.04	71.45	1488.040	71.447	4.801	1.528		old	1.528
							1072167az1_85_Zrn	4.7250	0.1439	0.3115	0.0142		1771.68	141.11	1747.89	90.92	1798.20	68.49	1798.196	68.488	3.809	2.798		old	2.798
							1072167az1_86_Zrn	2.7449	0.0837	0.2296	0.0104		1340.71	83.29	1332.42	67.10	1351.57	72.66	1351.575	72.655	5.376	1.418		old	1.418
							1072167az1_87_Zrn	3.0228	0.0955	0.2396	0.0109		1413.38	94.68	1384.50	70.04	1455.91	73.30	1455.909	73.305	5.035	4.904		old	4.904
							1072167az1_88_Zrn	4.3188	0.1641	0.2874	0.0152		1696.95	160.17	1628.39	97.36	1782.75	83.27	1782.746	83.270	4.671	8.658		old	8.658
							1072167az1_89_Zrn	3.3212	0.1016	0.2573	0.0117		1486.04	100.65	1476.01	75.23	1500.25	71.39	1500.255	71.389	4.758	1.616		old	1.616
							1072167az1_90_Zrn	11.2801	0.3609	0.4648	0.0220		2546.56	336.90	2460.73	140.85	2616.42	65.53	2616.417	65.532	2.505	5.950		old	5.950
							1072167az1_91_Zrn	undefined	undefined	undefined	undefined		undefined	undefined	undefined	undefined	undefined	undefined	undefined	undefined	#VALUE!	#VALUE!	#VALUE!	old	#VALUE!	#VALUE!	#VALUE!
							1072167az1_92_Zrn	3.0344	0.0927	0.2455	0.0112		1416.31	92.04	1415.18	71.70	1417.53	72.09	1417.528	72.088	5.085	0.166		old	0.166
							1072167az1_93_Zrn	1.6687	0.0518	0.1646	0.0075		996.71	51.92	982.17	48.33	1027.83	77.06	982.174	48.329	4.921	4.442		old	4.442
							1072167az1_94_Zrn	5.6709	0.1732	0.3474	0.0158		1926.96	168.67	1922.14	101.43	1930.27	67.57	1930.267	67.566	3.500	0.421		old	0.421
							1072167az1_95_Zrn	2.8781	0.0881	0.2367	0.0108		1376.20	87.51	1369.62	69.15	1383.84	72.49	1383.837	72.493	5.239	1.028		old	1.028
							1072167az1_96_Zrn	3.5914	0.1092	0.2644	0.0120		1547.63	107.98	1512.51	77.22	1595.85	70.18	1595.847	70.178	4.398	5.222		old	5.222
							1072167az1_97_Zrn	2.5029	0.0766	0.2191	0.0100		1272.89	76.32	1276.97	64.00	1265.32	73.70	1265.316	73.697	5.824	-0.921		old	-0.921
							1072167az1_98_Zrn	4.6108	0.1407	0.3113	0.0142		1751.23	138.07	1747.28	90.91	1756.10	68.95	1756.104	68.948	3.926	0.503		old	0.503
							1072167az1_99_Zrn	2.2758	0.0703	0.2040	0.0093		1204.82	70.20	1196.69	59.78	1217.74	74.75	1217.736	74.751	6.139	1.728		old	1.728
							1072167az1_100_Zrn	4.6784	0.1426	0.3132	0.0142		1763.39	139.83	1756.59	91.40	1768.84	68.75	1768.836	68.754	3.887	0.692		old	0.692
							1072167az1_101_Zrn	2.6912	0.0827	0.2263	0.0103		1326.03	82.25	1314.84	66.22	1341.24	73.15	1341.242	73.147	5.454	1.968		old	1.968
							1072167az1_102_Zrn	2.9896	0.0924	0.2429	0.0111		1404.99	91.70	1401.75	71.07	1407.34	72.74	1407.338	72.742	5.169	0.397		old	0.397
							1072167az1_103_Zrn	4.0671	0.1237	0.2856	0.0130		1647.73	121.86	1619.48	83.34	1685.34	69.36	1685.345	69.356	4.115	3.908		old	3.908
							1072167az1_104_Zrn	3.6101	0.1109	0.2682	0.0122		1551.75	109.64	1531.60	78.44	1578.03	70.87	1578.034	70.867	4.491	2.942		old	2.942
							1072167az1_105_Zrn	0.7790	0.0266	0.0937	0.0043		584.90	26.79	577.24	27.49	611.61	87.73	577.240	27.494	4.763	5.620		old	5.620
							1072167az1_106_Zrn	3.7815	0.1153	0.2767	0.0126		1588.82	113.78	1574.53	80.83	1608.16	70.19	1608.162	70.195	4.365	2.091		old	2.091
							1072167az1_107_Zrn	2.9925	0.0910	0.2395	0.0109		1405.70	90.36	1384.07	69.93	1438.94	71.65	1438.939	71.648	4.979	3.813		old	3.813
							1072167az1_108_Zrn	1.6547	0.0518	0.1636	0.0074		991.36	51.94	977.02	47.92	1018.42	77.61	977.021	47.917	4.904	4.065		old	4.065
							1072167az1_109_Zrn	3.4553	0.1049	0.2626	0.0119		1517.07	103.85	1503.17	76.59	1535.64	70.65	1535.643	70.649	4.601	2.115		old	2.115
							1072167az1_110_Zrn	3.1846	0.0972	0.2508	0.0114		1453.43	96.34	1442.77	73.25	1470.00	71.50	1470.002	71.495	4.864	1.853		old	1.853
43	U39	73	AFT-270710-16	1072-177	5.9689480	-72.6303040																						1160635	1151702	0.0000	0.0000		95	2	0	0	Socha Inferior	Early Paleocene				Early Paleocene	2	2	This work
44	U41	94	MP16	381-010	5.4682320	-72.4775590																						1177708	1096355	0.0000	0.0000		96	0	0	0	Barco	Early Paleocene				Early Paleocene	0	0	This work
45	U42	96	MP86	393-026	5.6732700	-72.2609450																						1201654	1119109	0.0000	0.0000		93	0	0	0	Barco	Early Paleocene				Early Paleocene	0	0	This work
46	U43	97	MP87	393-027	5.6730270	-72.2585460																						1201920	1119083	0.0000	0.0000		97	0	0	0	Barco	Early Paleocene				Early Paleocene	0	0	This work
100	U88	32	COR1003	1072-135	5.824604	-72.843943																						1137009	1135678	0.0000	0.0000		89	4	0	0	Picacho	Early-Middle Eocene		Early - Middle Eocene	Early - Middle Eocene	Early - Middle Eocene	4	4	This work	4 Cretaceous, no Cenozoic grains
							1072135az1_1_Zrn	1.9345	0.0507	0.1887	0.0072		1093.09	50.82	1114.46	46.29	1049.05	64.44	1049.045	64.440	6.143	-6.236		old	-6.236		disc. inv
							1072135az1_2_Zrn	0.2176	0.0063	0.0311	0.0012		199.88	6.38	197.53	7.66	222.73	79.09	197.532	7.659	3.877	11.312		young	0.000
							1072135az1_3_Zrn	2.7979	0.0716	0.2329	0.0089		1354.99	71.41	1349.57	56.98	1361.67	60.59	1361.666	60.594	4.450	0.888		old	0.888
							1072135az1_4_Zrn	4.7754	0.1216	0.3129	0.0119		1780.58	119.88	1754.81	76.49	1810.53	56.99	1810.528	56.992	3.148	3.078		old	3.078
							1072135az1_5_Zrn	4.3954	0.1123	0.3022	0.0115		1711.47	110.94	1702.25	73.99	1722.69	57.75	1722.687	57.752	3.352	1.186		old	1.186
							1072135az1_6_Zrn	1.6652	0.0443	0.1640	0.0063		995.34	44.49	979.22	40.24	1029.12	65.35	979.221	40.237	4.109	4.849		old	4.849
							1072135az1_7_Zrn	0.3468	0.0091	0.0480	0.0018		302.34	9.25	302.31	11.84	280.95	73.64	302.308	11.835	3.915	-7.602		old	-7.602		disc. inv
							1072135az1_8_Zrn	6.8394	0.1739	0.3811	0.0145		2090.84	169.29	2081.34	93.00	2100.27	55.03	2100.265	55.027	2.620	0.901		old	0.901
							1072135az1_9_Zrn	4.7537	0.1208	0.3144	0.0119		1776.76	119.09	1762.27	76.71	1789.31	57.03	1789.308	57.027	3.187	1.511		old	1.511
							1072135az1_10_Zrn	3.4098	0.0868	0.2610	0.0099		1506.65	86.27	1495.06	63.78	1518.99	59.12	1518.985	59.122	3.892	1.575		old	1.575
							1072135az1_11_Zrn	0.6214	0.0162	0.0795	0.0030		490.73	16.33	493.31	19.49	475.68	70.26	493.314	19.492	3.951	-3.707		old	-3.707
							1072135az1_12_Zrn	3.2874	0.0846	0.2548	0.0097		1478.08	84.09	1463.00	62.37	1499.75	59.70	1499.749	59.696	3.980	2.450		old	2.450
							1072135az1_13_Zrn	1.6055	0.0418	0.1602	0.0061		972.36	41.98	957.63	39.19	1004.84	64.55	957.628	39.192	4.093	4.698		old	4.698
							1072135az1_14_Zrn	1.5621	0.0426	0.1622	0.0062		955.32	42.79	968.97	39.79	921.79	67.50	968.969	39.792	4.107	-5.118		old	-5.118		disc. inv
							1072135az1_15_Zrn	2.4479	0.0698	0.2141	0.0082		1256.81	69.66	1250.87	52.75	1259.58	66.39	1259.576	66.386	5.271	0.691		old	0.691
							1072135az1_16_Zrn	3.2280	0.0836	0.2551	0.0097		1463.90	83.21	1464.69	62.44	1459.33	60.35	1459.327	60.347	4.135	-0.367		old	-0.367
							1072135az1_17_Zrn	3.3606	0.0930	0.2517	0.0101		1495.26	92.29	1447.48	64.64	1563.29	60.74	1563.290	60.737	3.885	7.408		old	7.408
							1072135az1_18_Zrn	4.5872	0.1164	0.3088	0.0117		1746.94	114.85	1735.00	75.34	1760.14	57.18	1760.143	57.184	3.249	1.429		old	1.429
							1072135az1_19_Zrn	0.7063	0.0199	0.0838	0.0032		542.55	20.13	518.80	20.59	632.14	72.42	518.805	20.586	3.968	17.929		old	17.929
							1072135az1_20_Zrn	2.4793	0.0637	0.2140	0.0081		1266.02	63.66	1250.35	52.36	1290.30	61.38	1290.302	61.378	4.757	3.097		old	3.097
							1072135az1_21_Zrn	3.9942	0.1020	0.2848	0.0108		1633.01	101.01	1615.38	69.67	1654.50	58.25	1654.502	58.248	3.521	2.364		old	2.364
							1072135az1_22_Zrn	0.2929	0.0125	0.0405	0.0016		260.82	12.61	255.96	10.10	287.66	105.47	255.958	10.105	3.948	11.020		young	0.000
							1072135az1_23_Zrn	undefined	undefined	undefined	undefined		undefined	undefined	undefined	undefined	undefined	undefined	undefined	undefined	#VALUE!	#VALUE!	#VALUE!	old	#VALUE!	#VALUE!	#VALUE!
							1072135az1_24_Zrn	undefined	undefined	undefined	undefined		undefined	undefined	undefined	undefined	undefined	undefined	undefined	undefined	#VALUE!	#VALUE!	#VALUE!	old	#VALUE!	#VALUE!	#VALUE!
							1072135az1_25_Zrn	2.0636	0.0532	0.1894	0.0072		1136.82	53.31	1117.90	46.45	1169.17	62.66	1169.171	62.661	5.359	4.385		old	4.385
							1072135az1_26_Zrn	2.4900	0.0637	0.2139	0.0081		1269.12	63.69	1249.56	52.33	1302.96	61.11	1302.961	61.112	4.690	4.099		old	4.099
							1072135az1_27_Zrn	2.2331	0.0575	0.2009	0.0077		1191.48	57.56	1180.01	49.42	1213.13	62.25	1213.127	62.248	5.131	2.730		old	2.730
							1072135az1_28_Zrn	4.5231	0.1152	0.3039	0.0116		1735.22	113.76	1710.48	74.33	1765.66	57.35	1765.656	57.349	3.248	3.125		old	3.125
							1072135az1_29_Zrn	1.3915	0.0386	0.1546	0.0059		885.35	38.86	926.61	38.01	779.88	70.02	926.609	38.010	4.102	-18.814		old	-18.814		disc. inv
							1072135az1_30_Zrn	0.1638	0.0066	0.0216	0.0008		154.00	6.73	137.83	5.34	409.12	98.93	137.834	5.344	3.877	66.309		young	0.000
							1072135az1_31_Zrn	undefined	undefined	undefined	undefined		undefined	undefined	undefined	undefined	undefined	undefined	undefined	undefined	#VALUE!	#VALUE!	#VALUE!	old	#VALUE!	#VALUE!	#VALUE!
							1072135az1_32_Zrn	undefined	undefined	undefined	undefined		undefined	undefined	undefined	undefined	undefined	undefined	undefined	undefined	#VALUE!	#VALUE!	#VALUE!	old	#VALUE!	#VALUE!	#VALUE!
							1072135az1_33_Zrn	undefined	undefined	undefined	undefined		undefined	undefined	undefined	undefined	undefined	undefined	undefined	undefined	#VALUE!	#VALUE!	#VALUE!	old	#VALUE!	#VALUE!	#VALUE!
							1072135az1_34_Zrn	3.3415	0.0869	0.2568	0.0098		1490.81	86.35	1473.49	62.82	1514.94	59.98	1514.941	59.978	3.959	2.736		old	2.736
							1072135az1_35_Zrn	1.5715	0.0413	0.1586	0.0060		959.02	41.51	949.21	38.93	979.76	65.31	949.212	38.933	4.102	3.118		old	3.118
							1072135az1_36_Zrn	undefined	undefined	undefined	undefined		undefined	undefined	undefined	undefined	undefined	undefined	undefined	undefined	#VALUE!	#VALUE!	#VALUE!	old	#VALUE!	#VALUE!	#VALUE!
							1072135az1_37_Zrn	0.2076	0.0082	0.0302	0.0012		191.52	8.35	191.54	7.61	188.57	101.78	191.544	7.613	3.975	-1.576		young	0.000
							1072135az1_38_Zrn	1.3451	0.0344	0.1419	0.0054		865.45	34.65	855.53	34.75	889.52	64.98	855.530	34.749	4.062	3.821		old	3.821
							1072135az1_39_Zrn	3.1853	0.0840	0.2465	0.0094		1453.60	83.51	1420.55	60.43	1497.49	60.74	1497.486	60.743	4.056	5.138		old	5.138
							1072135az1_40_Zrn	1.4929	0.0383	0.1549	0.0059		927.48	38.48	928.52	37.88	915.81	64.74	928.524	37.880	4.080	-1.388		old	-1.388
							1072135az1_41_Zrn	4.6850	0.1201	0.3142	0.0119		1764.57	118.40	1761.20	76.79	1774.56	57.49	1774.557	57.495	3.240	0.753		old	0.753
							1072135az1_42_Zrn	1.6721	0.0429	0.1665	0.0063		998.00	43.09	992.96	40.78	1009.62	63.87	992.961	40.781	4.107	1.650		old	1.650
							1072135az1_43_Zrn	2.1188	0.0539	0.1946	0.0074		1154.94	54.03	1146.50	47.58	1169.99	62.05	1169.985	62.054	5.304	2.007		old	2.007
							1072135az1_44_Zrn	undefined	undefined	undefined	undefined		undefined	undefined	undefined	undefined	undefined	undefined	undefined	undefined	#VALUE!	#VALUE!	#VALUE!	old	#VALUE!	#VALUE!	#VALUE!
							1072135az1_45_Zrn	3.2807	0.0855	0.2552	0.0097		1476.48	84.98	1465.05	62.66	1495.17	60.33	1495.173	60.329	4.035	2.015		old	2.015
							1072135az1_46_Zrn	4.5668	0.1169	0.3076	0.0117		1743.23	115.40	1728.81	75.16	1761.15	57.56	1761.147	57.564	3.269	1.836		old	1.836
							1072135az1_47_Zrn	1.4792	0.0394	0.1526	0.0058		921.89	39.61	915.27	37.61	935.50	66.17	915.272	37.606	4.109	2.162		old	2.162
							1072135az1_48_Zrn	3.7153	0.0954	0.2693	0.0103		1574.67	94.66	1537.45	66.10	1625.42	58.63	1625.423	58.629	3.607	5.412		old	5.412
							1072135az1_49_Zrn	4.1512	0.1066	0.2891	0.0110		1664.44	105.48	1637.10	70.99	1699.22	58.05	1699.222	58.052	3.416	3.656		old	3.656
							1072135az1_50_Zrn	3.2674	0.0849	0.2601	0.0100		1473.32	84.45	1490.24	63.98	1452.06	60.39	1452.061	60.390	4.159	-2.629		old	-2.629
							1072135az1_51_Zrn	5.3831	0.1563	0.3296	0.0127		1882.17	152.85	1836.59	81.30	1930.14	61.32	1930.140	61.325	3.177	4.847		old	4.847
							1072135az1_52_Zrn	4.6393	0.1192	0.3048	0.0116		1756.37	117.55	1714.88	74.85	1810.68	57.28	1810.682	57.279	3.163	5.291		old	5.291
							1072135az1_53_Zrn	1.0682	0.0287	0.1164	0.0045		737.85	28.98	710.00	29.13	814.32	68.24	709.999	29.134	4.103	12.811		old	12.811
							1072135az1_54_Zrn	4.4107	0.1152	0.2998	0.0115		1714.35	113.71	1690.38	74.08	1742.98	58.23	1742.979	58.227	3.341	3.018		old	3.018
							1072135az1_55_Zrn	0.7548	0.0197	0.0911	0.0035		571.00	19.86	562.31	22.53	605.39	68.82	562.312	22.534	4.007	7.116		old	7.116
							1072135az1_56_Zrn	4.5591	0.1188	0.3074	0.0118		1741.83	117.19	1727.78	75.98	1758.93	58.03	1758.926	58.028	3.299	1.771		old	1.771
							1072135az1_57_Zrn	3.7263	0.0973	0.2711	0.0104		1577.04	96.44	1546.62	66.96	1609.29	59.38	1609.294	59.376	3.690	3.894		old	3.894
							1072135az1_58	3.4164	0.0919	0.2626	0.0102		1508.18	91.23	1503.35	65.42	1512.81	61.08	1512.813	61.080	4.038	0.625		old	0.625
							1072135az1_59_Zrn	3.1694	0.0818	0.2490	0.0095		1449.74	81.41	1433.10	61.07	1469.43	60.12	1469.432	60.121	4.091	2.473		old	2.473
							1072135az1_60_Zrn	2.4800	0.0639	0.2148	0.0082		1266.20	63.91	1254.46	52.70	1284.22	61.62	1284.220	61.624	4.799	2.317		old	2.317
							1072135az1_61_Zrn	4.5188	0.1163	0.3066	0.0117		1734.43	114.77	1723.84	75.13	1746.48	57.89	1746.477	57.887	3.315	1.296		old	1.296
							1072135az1_62_Zrn	4.9697	0.1273	0.3209	0.0122		1814.18	125.28	1794.11	78.59	1835.82	57.03	1835.825	57.031	3.107	2.272		old	2.272
							1072135az1_63_Zrn	4.9183	0.1258	0.3146	0.0120		1805.39	123.91	1763.33	77.11	1853.43	56.90	1853.430	56.899	3.070	4.861		old	4.861
							1072135az1_64_Zrn	2.5295	0.0645	0.2161	0.0082		1280.56	64.44	1261.19	52.88	1311.25	60.89	1311.248	60.893	4.644	3.818		old	3.818
							1072135az1_65_Zrn	undefined	undefined	undefined	undefined		undefined	undefined	undefined	undefined	undefined	undefined	undefined	undefined	#VALUE!	#VALUE!	#VALUE!	old	#VALUE!	#VALUE!	#VALUE!
							1072135az1_66_Zrn	0.8701	0.0229	0.1030	0.0039		635.60	23.11	632.15	25.29	649.57	68.85	632.151	25.291	4.001	2.682		old	2.682
							1072135az1_67_Zrn	2.8491	0.0901	0.2269	0.0099		1368.59	89.44	1318.17	63.58	1449.36	68.15	1449.360	68.152	4.702	9.051		old	9.051
							1072135az1_68_Zrn	3.3430	0.0849	0.2593	0.0098		1491.17	84.41	1486.04	63.32	1499.27	59.16	1499.272	59.156	3.946	0.882		old	0.882
							1072135az1_69_Zrn	0.7297	0.0241	0.0867	0.0035		556.38	24.35	536.01	22.48	639.62	82.04	536.014	22.476	4.193	16.198		old	16.198
							1072135az1_70_Zrn	3.9785	0.1016	0.2867	0.0109		1629.83	100.60	1624.78	70.21	1634.51	58.40	1634.506	58.400	3.573	0.595		old	0.595
							1072135az1_71_Zrn	undefined	undefined	undefined	undefined		undefined	undefined	undefined	undefined	undefined	undefined	undefined	undefined	#VALUE!	#VALUE!	#VALUE!	old	#VALUE!	#VALUE!	#VALUE!
							1072135az1_72_Zrn	0.2879	0.0078	0.0410	0.0016		256.93	7.94	259.20	10.07	229.40	75.66	259.198	10.072	3.886	-12.991		young	0.000
							1072135az1_73_Zrn	1.6267	0.0493	0.1592	0.0067		980.59	49.50	952.06	43.09	1046.31	73.30	952.061	43.093	4.526	9.007		old	9.007
							1072135az1_74_Zrn	2.2727	0.0577	0.2038	0.0077		1203.87	57.78	1195.74	49.83	1225.18	61.45	1225.183	61.452	5.016	2.403		old	2.403
							1072135az1_75_Zrn	4.4151	0.1128	0.2989	0.0114		1715.17	111.39	1685.61	73.24	1752.70	57.56	1752.699	57.563	3.284	3.828		old	3.828
							1072135az1_76_Zrn	0.1553	0.0043	0.0227	0.0009		146.60	4.32	144.46	5.59	171.51	76.99	144.463	5.594	3.872	15.772		young	0.000
							1072135az1_77_Zrn	2.2450	0.0589	0.2000	0.0076		1195.22	58.97	1175.52	49.05	1229.99	62.83	1229.989	62.833	5.108	4.428		old	4.428
							1072135az1_78_Zrn	undefined	undefined	undefined	undefined		undefined	undefined	undefined	undefined	undefined	undefined	undefined	undefined	#VALUE!	#VALUE!	#VALUE!	old	#VALUE!	#VALUE!	#VALUE!
							1072135az1_79_Zrn	0.6814	0.0182	0.0868	0.0033		527.65	18.36	536.58	21.35	498.55	71.19	536.583	21.348	3.979	-7.629		old	-7.629		disc. inv
							1072135az1_80_Zrn	3.2715	0.0833	0.2577	0.0098		1474.29	82.84	1477.88	62.93	1467.04	59.52	1467.037	59.524	4.057	-0.739		old	-0.739
							1072135az1_81_Zrn	0.3021	0.0080	0.0417	0.0016		268.01	8.15	263.33	10.25	307.04	73.59	263.329	10.251	3.893	14.238		young	0.000
							1072135az1_82_Zrn	0.2980	0.0078	0.0409	0.0016		264.87	7.95	258.34	10.08	319.58	72.85	258.335	10.085	3.904	19.164		young	0.000
							1072135az1_83_Zrn	4.6532	0.1184	0.3115	0.0118		1758.86	116.78	1748.02	76.13	1777.62	57.18	1777.622	57.182	3.217	1.665		old	1.665
							1072135az1_84_Zrn	0.4492	0.0118	0.0607	0.0023		376.71	11.93	379.70	14.88	354.64	72.17	379.699	14.879	3.919	-7.066		old	-7.066		disc. inv
							1072135az1_85_Zrn	1.7696	0.0455	0.1740	0.0066		1034.36	45.64	1034.38	42.64	1035.10	63.73	1035.099	63.734	6.157	0.070		old	0.070
							1072135az1_86_Zrn	0.6008	0.0156	0.0756	0.0029		477.71	15.76	469.80	18.59	514.19	69.72	469.797	18.590	3.957	8.634		old	8.634
							1072135az1_87_Zrn	3.3898	0.0871	0.2622	0.0100		1502.03	86.55	1501.08	64.13	1500.71	59.64	1500.706	59.635	3.974	-0.025		old	-0.025
							1072135az1_88_Zrn	3.1603	0.0870	0.2426	0.0096		1447.51	86.43	1400.02	61.81	1544.89	61.99	1544.886	61.985	4.012	9.377		old	9.377
							1072135az1_89_Zrn	undefined	undefined	undefined	undefined		undefined	undefined	undefined	undefined	undefined	undefined	undefined	undefined	#VALUE!	#VALUE!	#VALUE!	old	#VALUE!	#VALUE!	#VALUE!
							1072135az1_90_Zrn	2.6221	0.0678	0.2254	0.0086		1306.85	67.69	1310.19	55.20	1301.84	61.55	1301.839	61.547	4.728	-0.642		old	-0.642
							1072135az1_91_Zrn	0.2951	0.0078	0.0420	0.0016		262.59	7.87	265.51	10.36	233.82	74.00	265.511	10.363	3.903	-13.554		young	0.000
							1072135az1_92_Zrn	0.2980	0.0078	0.0416	0.0016		264.87	7.86	262.44	10.20	283.28	72.70	262.440	10.201	3.887	7.355		young	0.000
							1072135az1_93_Zrn	4.4399	0.1132	0.3054	0.0116		1719.82	111.79	1717.97	74.65	1721.83	57.67	1721.831	57.670	3.349	0.224		old	0.224
							1072135az1_94_Zrn	3.7001	0.0941	0.2728	0.0104		1571.39	93.32	1554.77	66.61	1593.64	58.48	1593.640	58.478	3.669	2.439		old	2.439
							1072135az1_95	3.6581	0.5482	0.2373	0.0281		1562.28	491.95	1372.50	179.62	1829.38	196.98	1829.377	196.975	10.767	24.974	>10%	old	24.974
							1072135az1_96_Zrn	0.5449	0.0140	0.0699	0.0027		441.68	14.13	435.64	17.14	470.78	69.67	435.635	17.140	3.935	7.465		old	7.465
							1072135az1_97_Zrn	0.2930	0.0081	0.0417	0.0016		260.89	8.18	263.42	10.23	235.00	76.15	263.421	10.234	3.885	-12.096		young	0.000
							1072135az1_98_Zrn	3.4862	0.0901	0.2651	0.0101		1524.10	89.47	1515.94	64.87	1532.01	59.61	1532.006	59.609	3.891	1.048		old	1.048
							1072135az1_99_Zrn	4.6678	0.1188	0.3115	0.0119		1761.50	117.16	1748.26	76.17	1776.66	57.21	1776.662	57.214	3.220	1.598		old	1.598
							1072135az1_100_Zrn	3.7202	0.0969	0.2760	0.0105		1575.73	96.12	1571.31	67.81	1581.16	59.55	1581.158	59.551	3.766	0.623		old	0.623
							1072135az1_101_Zrn	undefined	undefined	undefined	undefined		undefined	undefined	undefined	undefined	undefined	undefined	undefined	undefined	#VALUE!	#VALUE!	#VALUE!	old	#VALUE!	#VALUE!	#VALUE!
							1072135az1_102_Zrn	undefined	undefined	undefined	undefined		undefined	undefined	undefined	undefined	undefined	undefined	undefined	undefined	#VALUE!	#VALUE!	#VALUE!	old	#VALUE!	#VALUE!	#VALUE!
							1072135az1_103_Zrn	0.1565	0.0041	0.0233	0.0009		147.60	4.21	148.47	5.74	133.97	75.71	148.471	5.740	3.866	-10.824		young	0.000
							1072135az1_104_Zrn	3.3747	0.0993	0.2524	0.0106		1498.54	98.42	1450.83	68.22	1566.71	66.16	1566.709	66.165	4.223	7.396		old	7.396
							1072135az1_105_Zrn	0.4145	0.0106	0.0557	0.0021		352.12	10.78	349.46	13.67	366.87	71.02	349.464	13.675	3.913	4.744		old	4.744
							1072135az1_106_Zrn	4.3511	0.1110	0.2982	0.0114		1703.11	109.69	1682.59	73.01	1727.80	57.66	1727.796	57.656	3.337	2.616		old	2.616
							1072135az1_107_Zrn	0.1742	0.0054	0.0253	0.0010		163.06	5.48	161.30	6.29	188.67	83.82	161.296	6.292	3.901	14.511		young	0.000
							1072135az1_108_Zrn	4.1840	0.1073	0.2899	0.0111		1670.89	106.08	1641.03	71.06	1707.60	58.01	1707.599	58.006	3.397	3.898		old	3.898
							1072135az1_109_Zrn	undefined	undefined	undefined	undefined		undefined	undefined	undefined	undefined	undefined	undefined	undefined	undefined	#VALUE!	#VALUE!	#VALUE!	old	#VALUE!	#VALUE!	#VALUE!
							1072135az1_110_Zrn	0.1542	0.0050	0.0223	0.0009		145.61	5.06	142.31	5.53	195.95	86.33	142.308	5.535	3.889	27.375		young	0.000
101	U89	33	COR1004	1072-136	5.8893070	-72.8194160																						1139710	1142841	0.0000	0.0000		101	14	3	0	Picacho	Early-Middle Eocene		Early - Middle Eocene	Early - Middle Eocene	Early - Middle Eocene	11	11	This work	3 grains provide maximum depo age of ~43Ma
							1072136az1_1_Zrn	0.3789	0.0131	0.0514	0.0020		326.20	13.29	323.28	12.98	328.87	88.88	323.280	12.977	4.014	1.700		old	1.700
							1072136az1_2_Zrn	0.9102	0.0281	0.1077	0.0041		657.16	28.30	659.13	26.51	636.45	77.05	659.129	26.508	4.022	-3.563		old	-3.563
							1072136az1_3_Zrn	1.6478	0.0432	0.1668	0.0063		988.69	43.43	994.22	40.87	977.42	65.19	994.216	40.869	4.111	-1.718		old	-1.718
							1072136az1_4_Zrn	3.8900	0.0992	0.2849	0.0108		1611.60	98.33	1616.03	69.67	1604.42	58.55	1604.422	58.553	3.649	-0.724		old	-0.724
							1072136az1_5_Zrn	3.3011	0.0859	0.2614	0.0099		1481.31	85.39	1497.14	63.97	1457.30	60.50	1457.296	60.501	4.152	-2.734		old	-2.734
							1072136az1_6_Zrn	4.7562	0.1211	0.3145	0.0120		1777.20	119.36	1762.73	76.84	1793.66	57.10	1793.657	57.096	3.183	1.724		old	1.724
							1072136az1_7_Zrn	4.7239	0.1200	0.3111	0.0118		1771.48	118.36	1745.95	75.99	1801.41	56.96	1801.414	56.959	3.162	3.079		old	3.079
							1072136az1_8_Zrn	0.0764	0.0021	0.0112	0.0004		74.77	2.16	71.53	2.74	178.23	77.57	71.527	2.744	3.836	59.868		young	0.000
							1072136az1_9_Zrn	0.0763	0.0021	0.0113	0.0004		74.63	2.16	72.44	2.79	146.21	78.38	72.435	2.790	3.852	50.459		young	0.000
							1072136az1_10_Zrn	2.4833	0.0634	0.2175	0.0083		1267.18	63.35	1268.50	53.21	1263.55	61.34	1263.552	61.339	4.854	-0.391		old	-0.391
							1072136az1_11_Zrn	0.0465	0.0017	0.0068	0.0003		46.15	1.72	43.80	1.70	165.31	95.29	43.802	1.695	3.871	73.504		young	0.000
							1072136az1_12_Zrn	2.1346	0.0556	0.1919	0.0073		1160.08	55.70	1131.86	47.03	1205.46	62.70	1205.462	62.695	5.201	6.106		old	6.106
							1072136az1_13_Zrn	4.5662	0.1168	0.3091	0.0118		1743.13	115.24	1736.30	75.60	1749.81	57.61	1749.808	57.613	3.293	0.772		old	0.772
							1072136az1_14_Zrn	3.1775	0.0830	0.2500	0.0095		1451.71	82.53	1438.70	61.24	1467.55	60.60	1467.553	60.604	4.130	1.966		old	1.966
							1072136az1_15_Zrn	2.7183	0.0747	0.2308	0.0088		1333.47	74.48	1338.92	56.56	1324.92	63.92	1324.920	63.916	4.824	-1.057		old	-1.057
							1072136az1_16_Zrn	2.4244	0.0618	0.2122	0.0081		1249.86	61.80	1240.44	51.93	1266.19	61.29	1266.195	61.287	4.840	2.034		old	2.034
							1072136az1_17_Zrn	undefined	undefined	undefined	undefined		undefined	undefined	undefined	undefined	undefined	undefined	undefined	undefined	#VALUE!	#VALUE!	#VALUE!	old	#VALUE!	#VALUE!	#VALUE!
							1072136az1_18_Zrn	6.6488	0.1687	0.3720	0.0141		2065.84	164.47	2039.00	90.81	2093.97	55.00	2093.968	55.001	2.627	2.625		old	2.625
							1072136az1_19_Zrn	0.7806	0.0212	0.0946	0.0036		585.82	21.44	582.87	23.29	597.46	70.99	582.872	23.287	3.995	2.441		old	2.441
							1072136az1_20_Zrn	3.3601	0.0869	0.2593	0.0099		1495.14	86.38	1486.25	63.52	1505.85	59.93	1505.848	59.928	3.980	1.301		old	1.301
							1072136az1_21_Zrn	3.3336	0.0871	0.2568	0.0098		1488.96	86.60	1473.62	63.04	1509.55	60.30	1509.549	60.302	3.995	2.380		old	2.380
							1072136az1_22_Zrn	11.8170	0.3053	0.4799	0.0184		2590.01	288.54	2526.80	118.05	2640.79	52.75	2640.793	52.745	1.997	4.317		old	4.317
							1072136az1_23_Zrn	4.9769	0.1272	0.3206	0.0122		1815.40	125.26	1792.65	78.48	1842.45	56.97	1842.455	56.965	3.092	2.703		old	2.703
							1072136az1_24_Zrn	1.3400	0.0352	0.1441	0.0055		863.24	35.46	868.02	35.38	845.85	66.66	868.023	35.378	4.076	-2.621		old	-2.621
							1072136az1_25_Zrn	0.0814	0.0024	0.0115	0.0004		79.48	2.48	73.62	2.83	249.10	80.95	73.616	2.832	3.847	70.448		young	0.000
							1072136az1_26_Zrn	4.4470	0.1133	0.3010	0.0115		1721.14	111.87	1696.03	73.69	1750.96	57.47	1750.956	57.465	3.282	3.137		old	3.137
							1072136az1_27_Zrn	undefined	undefined	undefined	undefined		undefined	undefined	undefined	undefined	undefined	undefined	undefined	undefined	#VALUE!	#VALUE!	#VALUE!	old	#VALUE!	#VALUE!	#VALUE!
							1072136az1_28_Zrn	4.9440	0.1276	0.3219	0.0123		1809.79	125.59	1799.21	78.95	1820.59	57.51	1820.585	57.511	3.159	1.174		old	1.174
							1072136az1_29_Zrn	4.4698	0.1144	0.3010	0.0115		1725.39	112.94	1696.25	73.72	1760.89	57.57	1760.887	57.573	3.270	3.671		old	3.671
							1072136az1_30_Zrn	2.6525	0.0684	0.2250	0.0086		1315.35	68.27	1308.41	55.20	1325.95	61.27	1325.948	61.270	4.621	1.323		old	1.323
							1072136az1_31_Zrn	4.9465	0.1257	0.3208	0.0122		1810.22	123.78	1793.50	78.35	1829.08	56.80	1829.078	56.796	3.105	1.945		old	1.945
							1072136az1_32_Zrn	2.9204	0.0744	0.2355	0.0089		1387.22	74.15	1363.07	57.54	1424.83	59.90	1424.829	59.897	4.204	4.335		old	4.335
							1072136az1_33_Zrn	2.9231	0.0771	0.2376	0.0091		1387.90	76.78	1374.36	58.34	1406.92	61.55	1406.922	61.555	4.375	2.315		old	2.315
							1072136az1_34_Zrn	0.1590	0.0060	0.0218	0.0008		149.87	6.05	139.06	5.36	306.90	94.41	139.062	5.365	3.858	54.688		young	0.000
							1072136az1_35_Zrn	0.0569	0.0033	0.0069	0.0003		56.19	3.37	44.31	1.70	585.44	130.91	44.307	1.705	3.847	92.432		young	0.000
							1072136az1_36_Zrn	0.1637	0.0044	0.0241	0.0009		153.97	4.48	153.28	5.90	157.34	76.19	153.283	5.905	3.852	2.581		young	0.000
							1072136az1_37_Zrn	1.7154	0.0440	0.1679	0.0064		1014.31	44.19	1000.60	41.22	1044.62	63.59	1044.618	63.593	6.088	4.213		old	4.213
							1072136az1_38_Zrn	1.9396	0.0496	0.1857	0.0071		1094.85	49.78	1097.77	45.38	1089.30	62.99	1089.297	62.992	5.783	-0.778		old	-0.778
							1072136az1_39_Zrn	1.5738	0.0407	0.1562	0.0060		959.92	40.89	935.51	38.60	1015.98	64.31	935.506	38.596	4.126	7.921		old	7.921
							1072136az1_40_Zrn	2.9681	0.0769	0.2453	0.0093		1399.50	76.66	1414.11	60.03	1375.04	61.04	1375.041	61.043	4.439	-2.842		old	-2.842
							1072136az1_41_Zrn	1.2206	0.0313	0.1306	0.0050		810.04	31.57	791.54	32.03	858.42	65.43	791.538	32.027	4.046	7.791		old	7.791
							1072136az1_42_Zrn	3.2694	0.0844	0.2533	0.0096		1473.81	83.94	1455.28	62.02	1498.71	59.87	1498.708	59.874	3.995	2.898		old	2.898
							1072136az1_43_Zrn	1.5634	0.0404	0.1598	0.0061		955.83	40.58	955.62	39.12	953.09	64.72	955.622	39.119	4.094	-0.265		old	-0.265
							1072136az1_44_Zrn	1.5984	0.0411	0.1604	0.0061		969.58	41.26	959.03	39.29	990.51	64.14	959.031	39.294	4.097	3.178		old	3.178
							1072136az1_45_Zrn	3.0677	0.0794	0.2468	0.0094		1424.66	79.02	1421.91	60.55	1430.43	60.48	1430.427	60.484	4.228	0.595		old	0.595
							1072136az1_46_Zrn	4.1395	0.1055	0.2892	0.0110		1662.14	104.40	1637.46	70.78	1692.87	57.90	1692.868	57.899	3.420	3.273		old	3.273
							1072136az1_47_Zrn	2.2146	0.0568	0.1981	0.0075		1185.65	56.88	1165.27	48.57	1221.60	61.98	1221.595	61.980	5.074	4.611		old	4.611
							1072136az1_48_Zrn	0.1639	0.0058	0.0235	0.0009		154.10	5.91	149.65	5.82	208.01	92.61	149.647	5.822	3.890	28.059		young	0.000
							1072136az1_49_Zrn	undefined	undefined	undefined	undefined		undefined	undefined	undefined	undefined	undefined	undefined	undefined	undefined	#VALUE!	#VALUE!	#VALUE!	old	#VALUE!	#VALUE!	#VALUE!
							1072136az1_50_Zrn	4.5922	0.1175	0.3066	0.0117		1747.85	115.96	1724.18	75.07	1775.68	57.38	1775.685	57.382	3.232	2.900		old	2.900
							1072136az1_51_Zrn	2.2164	0.0571	0.2008	0.0076		1186.23	57.20	1179.64	49.17	1195.58	62.37	1195.577	62.366	5.216	1.333		old	1.333
							1072136az1_52_Zrn	undefined	undefined	undefined	undefined		undefined	undefined	undefined	undefined	undefined	undefined	undefined	undefined	#VALUE!	#VALUE!	#VALUE!	old	#VALUE!	#VALUE!	#VALUE!
							1072136az1_53_Zrn	4.3432	0.1117	0.2976	0.0113		1701.60	110.39	1679.37	72.84	1729.00	57.98	1728.998	57.976	3.353	2.870		old	2.870
							1072136az1_54_Zrn	0.1646	0.0045	0.0236	0.0009		154.74	4.54	150.23	5.79	218.95	75.90	150.233	5.792	3.856	31.386		young	0.000
							1072136az1_55_Zrn	4.0078	0.1022	0.2853	0.0109		1635.78	101.19	1618.06	69.77	1658.02	58.13	1658.021	58.131	3.506	2.410		old	2.410
							1072136az1_56_Zrn	undefined	undefined	undefined	undefined		undefined	undefined	undefined	undefined	undefined	undefined	undefined	undefined	#VALUE!	#VALUE!	#VALUE!	old	#VALUE!	#VALUE!	#VALUE!
							1072136az1_57_Zrn	0.8467	0.0240	0.1010	0.0039		622.83	24.23	620.12	24.95	630.48	72.56	620.122	24.954	4.024	1.643		old	1.643
							1072136az1_58_Zrn	0.6760	0.0174	0.0845	0.0032		524.33	17.58	523.18	20.76	529.81	69.15	523.176	20.761	3.968	1.253		old	1.253
							1072136az1_59_Zrn	1.5998	0.0411	0.1604	0.0061		970.13	41.27	959.22	39.33	994.64	64.04	959.219	39.326	4.100	3.562		old	3.562
							1072136az1_60_Zrn	3.3201	0.0845	0.2566	0.0098		1485.78	84.05	1472.65	62.74	1505.06	59.22	1505.055	59.220	3.935	2.153		old	2.153
							1072136az1_61_Zrn	0.5806	0.0173	0.0747	0.0029		464.84	17.46	464.23	18.44	462.97	77.45	464.226	18.444	3.973	-0.271		old	-0.271
							1072136az1_62_Zrn	0.1607	0.0180	0.0210	0.0008		151.29	18.22	133.93	5.16	428.76	243.65	133.931	5.165	3.856	68.763		young	0.000
							1072136az1_63_Zrn	3.3237	0.0854	0.2570	0.0098		1486.64	84.93	1474.53	63.02	1502.03	59.52	1502.033	59.524	3.963	1.831		old	1.831
							1072136az1_64_Zrn	2.6051	0.0673	0.2244	0.0085		1302.09	67.18	1304.94	54.96	1299.34	61.53	1299.343	61.528	4.735	-0.431		old	-0.431
							1072136az1_65_Zrn	4.7572	0.1267	0.3068	0.0119		1777.38	124.72	1724.99	76.74	1839.16	58.76	1839.158	58.757	3.195	6.208		old	6.208
							1072136az1_66_Zrn	0.9072	0.0237	0.1072	0.0041		655.54	23.93	656.55	26.30	665.76	68.30	656.554	26.304	4.006	1.383		old	1.383
							1072136az1_67_Zrn	1.6379	0.0493	0.1599	0.0061		984.91	49.43	955.99	39.52	1037.77	71.20	955.995	39.523	4.134	7.880		old	7.880
							1072136az1_68_Zrn	3.4338	0.0880	0.2602	0.0099		1512.16	87.43	1490.87	63.76	1540.75	59.25	1540.750	59.247	3.845	3.237		old	3.237
							1072136az1_69_Zrn	0.2998	0.0082	0.0429	0.0016		266.21	8.34	270.60	10.54	224.07	76.24	270.601	10.542	3.896	-20.768		young	0.000
							1072136az1_70_Zrn	0.5973	0.0164	0.0770	0.0029		475.51	16.59	478.09	18.87	473.29	72.88	478.089	18.865	3.946	-1.014		old	-1.014
							1072136az1_71_Zrn	3.1639	0.0811	0.2493	0.0095		1448.40	80.77	1435.08	60.94	1466.11	59.84	1466.113	59.840	4.082	2.117		old	2.117
							1072136az1_72_Zrn	0.6700	0.0181	0.0853	0.0033		520.71	18.27	527.57	21.02	487.11	72.04	527.574	21.020	3.984	-8.308		old	-8.308		disc. inv
							1072136az1_73_Zrn	4.4716	0.1138	0.3037	0.0115		1725.72	112.43	1709.88	74.24	1745.40	57.46	1745.403	57.462	3.292	2.035		old	2.035
							1072136az1_74_Zrn	4.4937	0.1236	0.3028	0.0117		1729.81	121.74	1705.07	74.92	1756.21	59.49	1756.214	59.489	3.387	2.912		old	2.912
							1072136az1_75_Zrn	1.2902	0.0333	0.1376	0.0053		841.37	33.52	831.27	33.83	866.79	65.62	831.268	33.831	4.070	4.098		old	4.098
							1072136az1_76_Zrn	3.3153	0.0843	0.2563	0.0097		1484.65	83.81	1470.84	62.68	1507.93	59.16	1507.932	59.160	3.923	2.460		old	2.460
							1072136az1_77_Zrn	5.5192	0.1465	0.3294	0.0127		1903.59	143.56	1835.32	81.33	1977.50	57.54	1977.502	57.536	2.910	7.190		old	7.190
							1072136az1_78_Zrn	0.0906	0.0027	0.0132	0.0005		88.11	2.73	84.51	3.26	174.91	81.38	84.513	3.258	3.855	51.683		young	0.000
							1072136az1_79_Zrn	5.0913	0.1295	0.3253	0.0124		1834.66	127.44	1815.49	79.49	1856.42	56.65	1856.417	56.649	3.052	2.205		old	2.205
							1072136az1_80_Zrn	3.2355	0.0850	0.2594	0.0099		1465.70	84.56	1486.74	63.54	1434.08	61.10	1434.081	61.104	4.261	-3.672		old	-3.672
							1072136az1_81_Zrn	4.6840	0.1434	0.3057	0.0125		1764.39	140.63	1719.45	80.36	1818.15	65.62	1818.150	65.616	3.609	5.429		old	5.429
							1072136az1_82_Zrn	3.0658	0.0789	0.2470	0.0094		1424.18	78.61	1422.79	60.50	1424.13	60.38	1424.135	60.384	4.240	0.094		old	0.094
							1072136az1_83_Zrn	undefined	undefined	undefined	undefined		undefined	undefined	undefined	undefined	undefined	undefined	undefined	undefined	#VALUE!	#VALUE!	#VALUE!	old	#VALUE!	#VALUE!	#VALUE!
							1072136az1_84_Zrn	0.2996	0.0079	0.0426	0.0016		266.07	7.96	268.89	10.47	242.30	73.63	268.894	10.466	3.892	-10.977		young	0.000
							1072136az1_85_Zrn	3.4740	0.0906	0.2628	0.0100		1521.34	89.98	1504.10	64.53	1545.05	59.94	1545.050	59.942	3.880	2.651		old	2.651
							1072136az1_86_Zrn	3.9802	0.1026	0.2886	0.0110		1630.17	101.62	1634.71	70.71	1622.72	58.87	1622.718	58.870	3.628	-0.739		old	-0.739
							1072136az1_87_Zrn	undefined	undefined	undefined	undefined		undefined	undefined	undefined	undefined	undefined	undefined	undefined	undefined	#VALUE!	#VALUE!	#VALUE!	old	#VALUE!	#VALUE!	#VALUE!
							1072136az1_88_Zrn	3.2745	0.0871	0.2520	0.0097		1475.02	86.60	1448.99	62.12	1509.50	61.04	1509.498	61.036	4.043	4.009		old	4.009
							1072136az1_89_Zrn	0.2917	0.0079	0.0419	0.0016		259.92	8.05	264.43	10.28	209.79	75.96	264.433	10.277	3.886	-26.044		young	0.000
							1072136az1_90_Zrn	3.1484	0.0840	0.2450	0.0093		1444.60	83.51	1412.77	60.10	1489.43	61.31	1489.427	61.314	4.117	5.146		old	5.146
							1072136az1_91_Zrn	0.1483	0.0044	0.0211	0.0008		140.43	4.45	134.47	5.20	233.92	80.20	134.471	5.203	3.869	42.514		young	0.000
							1072136az1_92_Zrn	0.3055	0.0084	0.0420	0.0016		270.69	8.55	265.21	10.41	338.34	74.87	265.213	10.410	3.925	21.614		young	0.000
							1072136az1_93_Zrn	13.1174	0.3344	0.5156	0.0196		2688.13	313.95	2680.38	125.79	2695.26	51.87	2695.263	51.870	1.924	0.552		old	0.552
							1072136az1_94_Zrn	0.7401	0.0189	0.0902	0.0034		562.44	19.06	557.01	22.10	576.32	68.13	557.010	22.096	3.967	3.350		old	3.350
							1072136az1_95_Zrn	0.3104	0.0094	0.0441	0.0017		274.45	9.55	278.16	10.95	240.43	81.87	278.159	10.952	3.937	-15.691		young	0.000
							1072136az1_96_Zrn	3.3762	0.0893	0.2571	0.0098		1498.90	88.68	1474.82	63.04	1532.31	60.59	1532.306	60.590	3.954	3.752		old	3.752
							1072136az1_97_Zrn	3.9749	0.1015	0.2813	0.0107		1629.08	100.58	1597.69	68.96	1669.10	58.17	1669.097	58.174	3.485	4.278		old	4.278
							1072136az1_98_Zrn	0.5984	0.0155	0.0769	0.0029		476.20	15.67	477.53	18.88	467.73	70.21	477.529	18.880	3.954	-2.095		old	-2.095
							1072136az1_99_Zrn	undefined	undefined	undefined	undefined		undefined	undefined	undefined	undefined	undefined	undefined	undefined	undefined	#VALUE!	#VALUE!	#VALUE!	old	#VALUE!	#VALUE!	#VALUE!
							1072136az1_100_Zrn	1.8217	0.0465	0.1769	0.0067		1053.29	46.64	1050.24	43.29	1059.54	63.16	1059.541	63.157	5.961	0.878		old	0.878
							1072136az1_101_Zrn	0.2996	0.0086	0.0417	0.0016		266.05	8.72	263.62	10.26	281.06	77.80	263.624	10.256	3.890	6.205		young	0.000
							1072136az1_102_Zrn	3.3550	0.0855	0.2576	0.0098		1493.95	85.01	1477.60	63.01	1515.92	59.21	1515.918	59.205	3.906	2.528		old	2.528
							1072136az1_103_Zrn	12.3509	0.3304	0.4858	0.0192		2631.45	310.47	2552.50	122.94	2701.72	54.19	2701.715	54.190	2.006	5.523		old	5.523
							1072136az1_104_Zrn	2.3860	0.0612	0.2103	0.0080		1238.41	61.17	1230.55	51.62	1252.37	61.52	1252.367	61.517	4.912	1.742		old	1.742
							1072136az1_105_Zrn	0.0436	0.0012	0.0066	0.0003		43.36	1.21	42.32	1.65	110.91	77.29	42.318	1.645	3.888	61.843		young	0.000
							1072136az1_106_Zrn	0.1805	0.0049	0.0266	0.0010		168.47	4.94	169.46	6.57	151.88	76.30	169.464	6.571	3.878	-11.579		young	0.000
							1072136az1_107_Zrn	3.6171	0.0978	0.2658	0.0105		1553.29	96.98	1519.56	67.34	1598.55	61.40	1598.554	61.404	3.841	4.942		old	4.942
							1072136az1_108_Zrn	0.0797	0.0027	0.0121	0.0005		77.82	2.77	77.76	3.11	75.58	92.92	77.762	3.107	3.996	-2.887		young	0.000
							1072136az1_109_Zrn	0.0671	0.0023	0.0097	0.0004		65.93	2.38	62.02	2.41	198.82	91.53	62.022	2.406	3.880	68.806		young	0.000
							1072136az1_110_Zrn	0.8547	0.0224	0.1021	0.0039		627.22	22.61	626.60	25.12	627.48	68.80	626.596	25.125	4.010	0.141		old	0.141
102	U90	40	US-1004	1072-143	4.5153340	-74.1373950																						993732	990743	0.0000	0.0000		102	51	32	0	Bogota top	Early-Middle Eocene		Early-Middle Eocene	Depending of the stratigraphic position, it varies from Middle Paleocene to Middle Eocene	Middle Eocene	19	19	This work	Age based on youngest DZ
							1072143az_1_Zrn	0.0588	0.0022	0.0084	0.0003		58.03	2.20	54.07	2.26	221.12	96.75	54.066	2.255	4.172	75.549		young	0.000
							1072143az_2_Zrn	0.3356	0.0125	0.0433	0.0018		293.83	12.69	273.40	11.71	455.02	94.13	273.400	11.712	4.284	39.914		young	0.000
							1072143az_3_Zrn	0.0594	0.0023	0.0083	0.0003		58.58	2.31	53.55	2.23	254.40	99.27	53.547	2.232	4.169	78.951		young	0.000
							1072143az_4_Zrn	0.0681	0.0034	0.0085	0.0004		66.85	3.40	54.87	2.31	508.52	116.10	54.866	2.308	4.206	89.211		young	0.000
							1072143az_5_Zrn	0.1808	0.0064	0.0253	0.0010		168.72	6.45	160.84	6.76	270.35	92.67	160.841	6.765	4.206	40.507		young	0.000
							1072143az_6_Zrn	0.0578	0.0024	0.0085	0.0004		57.01	2.41	54.25	2.28	167.66	106.29	54.251	2.275	4.193	67.642		young	0.000
							1072143az_7_Zrn	0.5884	0.0169	0.0751	0.0031		469.86	17.11	466.86	20.03	485.29	77.20	466.856	20.033	4.291	3.798		old	3.798
							1072143az_8_Zrn	0.0600	0.0025	0.0085	0.0004		59.21	2.53	54.73	2.33	239.36	106.61	54.729	2.333	4.263	77.136		young	0.000
							1072143az_9_Zrn	1.7906	0.0491	0.1736	0.0071		1042.05	49.27	1032.09	45.82	1062.80	68.12	1062.797	68.117	6.409	2.890		old	2.890
							1072143az_10_Zrn	0.1583	0.0060	0.0223	0.0009		149.19	6.04	142.39	6.07	253.13	97.73	142.390	6.074	4.266	43.748		young	0.000
							1072143az_11_Zrn	0.0804	0.0075	0.0110	0.0006		78.50	7.63	70.50	3.75	328.53	215.08	70.500	3.753	5.323	78.541		young	0.000
							1072143az_12_Zrn	0.0802	0.0030	0.0113	0.0005		78.36	3.04	72.52	3.05	255.48	97.58	72.519	3.045	4.199	71.615		young	0.000
							1072143az_13_Zrn	2.2673	0.0643	0.2031	0.0084		1202.19	64.31	1192.20	53.90	1215.32	68.29	1215.317	68.288	5.619	1.902		old	1.902
							1072143az_14_Zrn	0.1975	0.0119	0.0254	0.0011		182.99	12.03	161.89	6.94	459.47	138.98	161.892	6.941	4.287	64.766		young	0.000
							1072143az_15_Zrn	0.0671	0.0029	0.0090	0.0004		65.99	2.93	57.96	2.51	366.11	105.96	57.956	2.506	4.323	84.170		young	0.000
							1072143az_16_Zrn	0.2636	0.0075	0.0374	0.0015		237.56	7.64	236.92	9.90	241.54	80.17	236.924	9.901	4.179	1.909		young	0.000
							1072143az_17_Zrn	1.4440	0.0399	0.1515	0.0062		907.40	40.13	909.30	40.03	902.91	70.18	909.301	40.026	4.402	-0.707		old	-0.707
							1072143az_18_Zrn	undefined	undefined	undefined	undefined		undefined	undefined	undefined	undefined	undefined	undefined	undefined	undefined	#VALUE!	#VALUE!	#VALUE!	old	#VALUE!	#VALUE!	#VALUE!
							1072143az_19_Zrn	0.0565	0.0064	0.0079	0.0004		55.81	6.49	50.60	2.44	281.88	256.58	50.603	2.440	4.822	82.048		young	0.000
							1072143az_20_Zrn	0.3182	0.0128	0.0411	0.0017		280.55	12.92	259.81	11.17	432.47	100.13	259.813	11.175	4.301	39.923		young	0.000
							1072143az_21_Zrn	0.0706	0.0092	0.0092	0.0005		69.27	9.28	58.74	2.95	442.97	283.41	58.735	2.946	5.015	86.741		young	0.000
							1072143az_22_Zrn	0.3282	0.0098	0.0445	0.0019		288.21	9.94	280.60	11.92	345.59	81.42	280.604	11.922	4.249	18.805		young	0.000
							1072143az_23_Zrn	undefined	undefined	undefined	undefined		undefined	undefined	undefined	undefined	undefined	undefined	undefined	undefined	#VALUE!	#VALUE!	#VALUE!	old	#VALUE!	#VALUE!	#VALUE!
							1072143az_24	undefined	undefined	undefined	undefined		undefined	undefined	undefined	undefined	undefined	undefined	undefined	undefined	#VALUE!	#VALUE!	#VALUE!	old	#VALUE!	#VALUE!	#VALUE!
							1072143az_25_Zrn	0.7450	0.0219	0.0908	0.0038		565.34	22.13	560.09	24.22	583.87	77.22	560.091	24.219	4.324	4.073		old	4.073
							1072143az_26_Zrn	0.1095	0.0084	0.0136	0.0006		105.55	8.49	86.82	3.80	548.23	170.01	86.819	3.797	4.374	84.164		young	0.000
							1072143az_27_Zrn	0.1822	0.0060	0.0253	0.0010		169.92	6.13	160.91	6.75	291.18	88.43	160.912	6.755	4.198	44.737		young	0.000
							1072143az_28_Zrn	0.0618	0.0034	0.0085	0.0004		60.92	3.42	54.66	2.57	301.87	139.53	54.660	2.573	4.708	81.893		young	0.000
							1072143az_29_Zrn	0.1581	0.0056	0.0227	0.0009		149.04	5.69	144.61	6.09	209.69	94.23	144.611	6.088	4.210	31.035		young	0.000
							1072143az_30_Zrn	1.2922	0.0398	0.1314	0.0054		842.27	40.02	796.10	34.76	959.09	74.64	796.100	34.759	4.366	16.994		old	16.994
							1072143az_31_Zrn	0.0696	0.0095	0.0087	0.0005		68.31	9.61	56.13	3.13	513.51	299.09	56.131	3.128	5.572	89.069		young	0.000
							1072143az_32_Zrn	undefined	undefined	undefined	undefined		undefined	undefined	undefined	undefined	undefined	undefined	undefined	undefined	#VALUE!	#VALUE!	#VALUE!	old	#VALUE!	#VALUE!	#VALUE!
							1072143az_33_Zrn	2.0187	0.0556	0.1905	0.0078		1121.82	55.68	1124.34	50.27	1117.42	67.76	1117.420	67.758	6.064	-0.619		old	-0.619
							1072143az_34_Zrn	0.0557	0.0024	0.0076	0.0003		55.06	2.42	48.73	2.03	343.26	106.14	48.727	2.034	4.174	85.805		young	0.000
							1072143az_35_Zrn	0.3115	0.0099	0.0431	0.0018		275.32	10.04	272.22	11.51	296.09	85.70	272.217	11.514	4.230	8.062		young	0.000
							1072143az_36_Zrn	0.1001	0.0052	0.0137	0.0006		96.90	5.31	87.73	3.72	319.87	125.89	87.732	3.723	4.243	72.573		young	0.000
							1072143az_37_Zrn	0.1697	0.0060	0.0241	0.0010		159.14	6.03	153.26	6.45	244.44	92.71	153.258	6.450	4.209	37.302		young	0.000
							1072143az_38_Zrn	undefined	undefined	undefined	undefined		undefined	undefined	undefined	undefined	undefined	undefined	undefined	undefined	#VALUE!	#VALUE!	#VALUE!	old	#VALUE!	#VALUE!	#VALUE!
							1072143az_39_Zrn	0.0611	0.0025	0.0087	0.0004		60.22	2.52	55.92	2.34	224.69	103.88	55.917	2.335	4.176	75.114		young	0.000
							1072143az_40_Zrn	0.1678	0.0072	0.0239	0.0010		157.48	7.33	152.06	6.66	241.44	109.13	152.060	6.664	4.382	37.019		young	0.000
							1072143az_41_Zrn	0.0602	0.0030	0.0083	0.0004		59.36	2.99	53.16	2.28	309.75	119.93	53.158	2.283	4.294	82.838		young	0.000
							1072143az_42_Zrn	0.0574	0.0021	0.0082	0.0003		56.67	2.18	52.55	2.21	221.63	97.67	52.554	2.211	4.206	76.287		young	0.000
							1072143az_43_Zrn	undefined	undefined	undefined	undefined		undefined	undefined	undefined	undefined	undefined	undefined	undefined	undefined	#VALUE!	#VALUE!	#VALUE!	old	#VALUE!	#VALUE!	#VALUE!
							1072143az_44_Zrn	0.3001	0.0087	0.0408	0.0017		266.47	8.80	257.97	10.93	343.96	79.27	257.974	10.927	4.236	24.999		young	0.000
							1072143az_45_Zrn	0.0646	0.0027	0.0089	0.0004		63.60	2.76	56.97	2.40	304.26	105.55	56.966	2.399	4.212	81.277		young	0.000
							1072143az_46_Zrn	1.5657	0.0458	0.1548	0.0064		956.73	45.94	927.71	41.19	1023.33	71.47	927.705	41.191	4.440	9.345		old	9.345
							1072143az_47_Zrn	1.4479	0.0402	0.1482	0.0061		908.98	40.46	890.77	39.28	951.26	69.83	890.769	39.284	4.410	6.359		old	6.359
							1072143az_48_Zrn	0.0580	0.0028	0.0079	0.0003		57.29	2.85	51.03	2.22	327.58	118.60	51.026	2.215	4.341	84.423		young	0.000
							1072143az_49_Zrn	0.0654	0.0035	0.0086	0.0004		64.28	3.53	54.96	2.33	402.16	126.19	54.960	2.329	4.238	86.334		young	0.000
							1072143az_50_Zrn	0.1622	0.0050	0.0242	0.0010		152.67	5.05	154.33	6.51	131.54	85.96	154.325	6.511	4.219	-17.319		young	0.000
							1072143az_51_Zrn	0.0685	0.0041	0.0086	0.0004		67.26	4.20	55.17	2.45	520.77	138.68	55.170	2.450	4.440	89.406		young	0.000
							1072143az_52_Zrn	0.0611	0.0029	0.0083	0.0004		60.25	2.91	53.10	2.34	360.95	115.92	53.099	2.345	4.416	85.289		young	0.000
							1072143az_53_Zrn	1.8443	0.0512	0.1763	0.0073		1061.39	51.31	1046.85	46.75	1090.14	68.36	1090.138	68.364	6.271	3.971		old	3.971
							1072143az_54_Zrn	0.1584	0.0087	0.0229	0.0010		149.29	8.79	145.73	6.29	183.54	134.56	145.730	6.288	4.315	20.602		young	0.000
							1072143az_55_Zrn	0.1783	0.0054	0.0257	0.0011		166.63	5.51	163.62	6.85	198.90	84.35	163.621	6.851	4.187	17.738		young	0.000
							1072143az_56_Zrn	0.0775	0.0032	0.0110	0.0005		75.78	3.30	70.56	2.98	239.26	106.78	70.560	2.976	4.218	70.510		young	0.000
							1072143az_57_Zrn	0.0604	0.0028	0.0082	0.0003		59.56	2.80	52.87	2.22	315.93	112.70	52.874	2.220	4.199	83.264		young	0.000
							1072143az_58_Zrn	0.0667	0.0042	0.0086	0.0004		65.58	4.31	55.18	2.37	465.72	145.93	55.176	2.375	4.304	88.153		young	0.000
							1072143az_59_Zrn	0.6112	0.0177	0.0769	0.0032		484.29	17.85	477.63	20.42	509.06	77.04	477.633	20.423	4.276	6.174		old	6.174
							1072143az_60_Zrn	2.4616	0.0683	0.2108	0.0087		1260.83	68.20	1233.26	55.66	1307.12	66.27	1307.121	66.267	5.070	5.650		old	5.650
							1072143az_61_Zrn	0.0679	0.0040	0.0090	0.0004		66.69	4.04	58.01	2.48	386.67	138.03	58.007	2.480	4.276	84.998		young	0.000
							1072143az_62_Zrn	0.6480	0.0184	0.0826	0.0034		507.24	18.60	511.53	21.88	490.60	76.42	511.531	21.883	4.278	-4.266		old	-4.266
							1072143az_63_Zrn	0.3233	0.0094	0.0447	0.0018		284.42	9.52	281.67	11.88	300.95	80.33	281.673	11.883	4.219	6.405		young	0.000
							1072143az_64_Zrn	1.8112	0.0500	0.1765	0.0073		1049.51	50.14	1048.01	46.66	1050.46	68.57	1050.458	68.568	6.527	0.233		old	0.233
							1072143az_65_Zrn	0.0585	0.0046	0.0072	0.0003		57.68	4.64	46.20	2.05	562.56	174.13	46.201	2.045	4.426	91.787		young	0.000
							1072143az_66_Zrn	2.2854	0.0638	0.2033	0.0084		1207.79	63.73	1192.89	53.84	1231.04	67.28	1231.035	67.275	5.465	3.099		old	3.099
							1072143az_67_Zrn	0.0613	0.0023	0.0087	0.0004		60.45	2.30	55.73	2.33	242.09	96.73	55.730	2.327	4.175	76.979		young	0.000
							1072143az_68_Zrn	0.0568	0.0023	0.0080	0.0003		56.06	2.33	51.16	2.16	266.59	103.66	51.156	2.159	4.220	80.811		young	0.000
							1072143az_69_Zrn	2.2837	0.0657	0.1991	0.0084		1207.26	65.63	1170.45	53.99	1273.78	68.13	1273.777	68.131	5.349	8.112		old	8.112
							1072143az_70_Zrn	0.0596	0.0024	0.0080	0.0003		58.75	2.41	51.60	2.15	354.34	100.42	51.604	2.152	4.170	85.436		young	0.000
							1072143az_71_Zrn	1.5615	0.0431	0.1570	0.0065		955.06	43.27	940.01	41.54	988.16	69.18	940.013	41.536	4.419	4.873		old	4.873
							1072143az_72_Zrn	0.3022	0.0093	0.0416	0.0017		268.10	9.38	262.63	11.06	312.86	83.13	262.631	11.059	4.211	16.054		young	0.000
							1072143az_73_Zrn	0.0635	0.0038	0.0077	0.0003		62.51	3.89	49.21	2.07	607.42	135.92	49.209	2.069	4.204	91.899		young	0.000
							1072143az_74_Zrn	0.0553	0.0021	0.0081	0.0003		54.67	2.17	51.75	2.17	179.23	101.39	51.748	2.170	4.193	71.128		young	0.000
							1072143az_75_Zrn	0.1518	0.0148	0.0199	0.0008		143.50	14.93	127.27	5.28	402.56	214.83	127.265	5.277	4.147	68.386		young	0.000
							1072143az_76_Zrn	0.0592	0.0022	0.0086	0.0004		58.38	2.23	55.39	2.33	178.51	98.40	55.394	2.325	4.198	68.969		young	0.000
							1072143az_77_Zrn	0.6525	0.0182	0.0818	0.0034		510.02	18.36	506.85	21.65	528.45	74.93	506.850	21.647	4.271	4.087		old	4.087
							1072143az_78_Zrn	1.0638	0.0309	0.1210	0.0050		735.68	31.12	736.24	32.05	721.45	74.63	736.236	32.046	4.353	-2.050		old	-2.050
							1072143az_79_Zrn	0.2421	0.0067	0.0346	0.0014		220.14	6.82	219.31	9.18	228.33	78.86	219.305	9.177	4.184	3.953		young	0.000
							1072143az_80_Zrn	0.2066	0.0075	0.0267	0.0011		190.73	7.60	170.15	7.23	327.98	93.45	170.148	7.232	4.250	48.122		young	0.000
							1072143az_81_Zrn	undefined	undefined	undefined	undefined		undefined	undefined	undefined	undefined	undefined	undefined	undefined	undefined	#VALUE!	#VALUE!	#VALUE!	old	#VALUE!	#VALUE!	#VALUE!
							1072143az_82_Zrn	0.0745	0.0185	0.0072	0.0003		73.00	18.67	46.19	2.17	1082.16	447.25	46.188	2.173	4.705	95.732		young	0.000
							1072143az_83_Zrn	0.0991	0.0039	0.0133	0.0006		95.92	3.94	84.89	3.56	375.52	98.73	84.886	3.560	4.194	77.395		young	0.000
							1072143az_84_Zrn	0.0555	0.0023	0.0080	0.0003		54.80	2.31	51.65	2.18	188.41	105.92	51.646	2.178	4.216	72.588		young	0.000
							1072143az_85_Zrn	0.0599	0.0024	0.0085	0.0004		59.07	2.39	54.31	2.29	235.74	101.45	54.311	2.290	4.216	76.961		young	0.000
							1072143az_86_Zrn	0.0610	0.0033	0.0083	0.0003		60.13	3.31	53.15	2.26	330.56	128.02	53.151	2.256	4.244	83.921		young	0.000
							1072143az_87_Zrn	0.0663	0.0024	0.0094	0.0004		65.22	2.43	60.43	2.54	233.05	94.78	60.428	2.540	4.203	74.071		young	0.000
							1072143az_88_Zrn	1.3289	0.0379	0.1385	0.0057		858.38	38.10	836.21	36.65	906.35	71.58	836.209	36.652	4.383	7.739		old	7.739
							1072143az_89_Zrn	0.0630	0.0066	0.0079	0.0004		62.06	6.64	50.80	2.54	521.44	228.69	50.802	2.543	5.006	90.257		young	0.000
							1072143az_90_Zrn	0.2044	0.0065	0.0289	0.0012		188.88	6.55	183.79	7.79	244.46	86.40	183.793	7.786	4.236	24.816		young	0.000
							1072143az_91_Zrn	0.0674	0.0052	0.0089	0.0004		66.27	5.26	57.13	2.64	390.04	176.03	57.128	2.639	4.620	85.353		young	0.000
							1072143az_92_Zrn	0.0621	0.0033	0.0082	0.0003		61.14	3.32	52.55	2.21	409.59	125.17	52.549	2.211	4.208	87.170		young	0.000
							1072143az_93_Zrn	0.1833	0.0056	0.0259	0.0011		170.88	5.66	164.66	6.87	258.33	83.47	164.656	6.871	4.173	36.261		young	0.000
							1072143az_94_Zrn	0.6714	0.0216	0.0813	0.0033		521.59	21.77	503.91	21.47	595.50	81.47	503.909	21.468	4.260	15.381		old	15.381
							1072143az_95_Zrn	14.0465	0.4915	0.5092	0.0249		2752.85	446.23	2653.26	159.53	2826.87	68.06	2826.867	68.064	2.408	6.141		old	6.141
							1072143az_96_Zrn	1.0171	0.0282	0.1170	0.0048		712.47	28.42	713.05	30.94	717.35	72.41	713.049	30.939	4.339	0.600		old	0.600
							1072143az_97_Zrn	1.7399	0.0480	0.1706	0.0070		1023.44	48.12	1015.32	45.10	1039.52	68.61	1039.518	68.612	6.600	2.328		old	2.328
							1072143az_98_Zrn	0.0533	0.0031	0.0073	0.0003		52.72	3.13	47.01	1.99	314.14	138.19	47.005	1.992	4.237	85.037		young	0.000
							1072143az_99_Zrn	0.1639	0.0049	0.0239	0.0010		154.07	5.01	152.17	6.36	176.87	84.17	152.171	6.365	4.182	13.965		young	0.000
							1072143az_100_Zrn	undefined	undefined	undefined	undefined		undefined	undefined	undefined	undefined	undefined	undefined	undefined	undefined	#VALUE!	#VALUE!	#VALUE!	old	#VALUE!	#VALUE!	#VALUE!
							1072143az_101_Zrn	0.0626	0.0035	0.0083	0.0004		61.70	3.59	53.05	2.26	411.71	132.57	53.047	2.265	4.269	87.115		young	0.000
							1072143az_102_Zrn	5.7415	0.1579	0.3489	0.0143		1937.64	154.34	1929.31	92.02	1945.17	60.73	1945.173	60.733	3.122	0.816		old	0.816
							1072143az_103_Zrn	0.7405	0.0213	0.0912	0.0038		562.72	21.47	562.44	24.21	560.44	76.11	562.436	24.209	4.304	-0.356		old	-0.356
							1072143az_104_Zrn	0.7852	0.0235	0.0942	0.0039		588.43	23.72	580.35	25.14	618.21	77.66	580.355	25.145	4.333	6.123		old	6.123
							1072143az_105_Zrn	0.0610	0.0036	0.0080	0.0003		60.16	3.65	51.26	2.21	431.46	138.04	51.257	2.207	4.305	88.120		young	0.000
							1072143az_106_Zrn	0.0669	0.0029	0.0088	0.0004		65.74	2.97	56.64	2.37	410.27	106.88	56.637	2.370	4.185	86.195		young	0.000
							1072143az_107_Zrn	6.1593	0.1700	0.3532	0.0145		1998.69	165.63	1949.70	93.28	2050.45	60.10	2050.455	60.096	2.931	4.914		old	4.914
							1072143az_108_Zrn	0.1690	0.0050	0.0240	0.0010		158.56	5.07	152.89	6.41	237.19	82.36	152.895	6.414	4.195	35.540		young	0.000
							1072143az_109_Zrn	0.2720	0.0077	0.0376	0.0015		244.29	7.85	238.23	9.95	290.89	79.21	238.227	9.952	4.177	18.104		young	0.000
							1072143az_110_Zrn	0.1713	0.0049	0.0246	0.0010		160.52	4.96	156.82	6.53	209.66	80.66	156.821	6.527	4.162	25.203		young	0.000
103	U91	45	PES-1004	1072-148	5.6073240	-73.0147080																						1118137	1111607	0.0000	0.0000		101	10	2	0	Picacho	Early-Middle Eocene		Early - Middle Eocene	Early - Middle Eocene	Early - Middle Eocene	8	8	This work
							1072148az1_1_Zrn	0.7016	0.0183	0.0880	0.0033		539.72	18.48	543.66	21.39	521.49	70.14	543.660	21.395	3.935	-4.251		old	-4.251
							1072148az1_2_Zrn	0.6776	0.0176	0.0847	0.0032		525.35	17.82	524.02	20.56	522.68	70.01	524.020	20.560	3.924	-0.257		old	-0.257
							1072148az1_3_Zrn	3.1853	0.0806	0.2546	0.0096		1453.59	80.27	1462.24	61.72	1439.65	59.82	1439.650	59.820	4.155	-1.569		old	-1.569
							1072148az1_4_Zrn	1.6034	0.0415	0.1626	0.0061		971.52	41.71	971.21	39.56	973.81	64.85	971.211	39.556	4.073	0.267		old	0.267
							1072148az1_5_Zrn	0.0885	0.0024	0.0128	0.0005		86.09	2.44	82.13	3.12	192.51	76.40	82.131	3.118	3.796	57.337		young	0.000
							1072148az1_6_Zrn	2.1855	0.0547	0.1992	0.0075		1176.43	54.83	1171.28	48.22	1185.24	61.51	1185.236	61.509	5.190	1.178		old	1.178
							1072148az1_7_Zrn	0.7588	0.0190	0.0930	0.0035		573.34	19.23	573.29	22.53	572.79	67.74	573.293	22.533	3.930	-0.087		old	-0.087
							1072148az1_8_Zrn	3.7584	0.1032	0.2688	0.0106		1583.90	102.18	1534.65	68.22	1650.39	60.21	1650.386	60.213	3.648	7.013		old	7.013
							1072148az1_9_Zrn	0.7923	0.0201	0.0951	0.0036		592.50	20.33	585.69	23.11	622.24	67.71	585.693	23.109	3.946	5.873		old	5.873
							1072148az1_10_Zrn	0.0586	0.0062	0.0082	0.0003		57.84	6.27	52.66	2.15	292.54	234.83	52.657	2.147	4.076	82.000		young	0.000
							1072148az1_11_Zrn	0.6503	0.0190	0.0817	0.0031		508.66	19.19	506.55	20.05	510.30	76.19	506.546	20.050	3.958	0.736		old	0.736
							1072148az1_12_Zrn	0.1447	0.0080	0.0198	0.0008		137.24	8.11	126.41	4.97	319.06	132.14	126.412	4.972	3.933	60.380		young	0.000
							1072148az1_13_Zrn	5.1734	0.1294	0.3281	0.0123		1848.25	127.28	1829.02	79.26	1869.84	56.14	1869.842	56.136	3.002	2.183		old	2.183
							1072148az1_14_Zrn	1.6709	0.0508	0.1685	0.0064		997.55	50.97	1003.62	40.92	965.68	72.71	965.677	72.706	7.529	-3.929		old	-3.929
							1072148az1_15_Zrn	2.7417	0.0692	0.2292	0.0086		1339.84	69.07	1330.14	55.54	1354.22	60.38	1354.222	60.383	4.459	1.779		old	1.779
							1072148az1_16_Zrn	2.5901	0.0685	0.2188	0.0084		1297.85	68.40	1275.29	54.34	1337.25	62.16	1337.250	62.161	4.648	4.633		old	4.633
							1072148az1_17_Zrn	2.7398	0.0692	0.2281	0.0086		1339.33	69.04	1324.74	55.22	1361.31	60.30	1361.315	60.303	4.430	2.686		old	2.686
							1072148az1_18_Zrn	2.2779	0.0578	0.2021	0.0076		1205.48	57.87	1186.84	48.98	1236.16	61.62	1236.156	61.616	4.985	3.989		old	3.989
							1072148az1_19_Zrn	0.2402	0.0065	0.0333	0.0013		218.56	6.61	211.31	8.09	293.25	74.95	211.312	8.089	3.828	27.942		young	0.000
							1072148az1_20_Zrn	0.1788	0.0075	0.0246	0.0009		167.06	7.63	156.70	6.12	301.43	104.71	156.697	6.117	3.904	48.016		young	0.000
							1072148az1_21_Zrn	5.0727	0.1276	0.3269	0.0123		1831.54	125.61	1823.48	79.02	1842.57	56.56	1842.566	56.565	3.070	1.036		old	1.036
							1072148az1_22_Zrn	3.3114	0.0835	0.2586	0.0097		1483.75	83.07	1482.86	62.62	1482.66	59.30	1482.660	59.304	4.000	-0.014		old	-0.014
							1072148az1_23_Zrn	0.0670	0.0049	0.0085	0.0003		65.86	4.95	54.44	2.14	486.86	163.34	54.441	2.139	3.929	88.818		young	0.000
							1072148az1_24_Zrn	undefined	undefined	undefined	undefined		undefined	undefined	undefined	undefined	undefined	undefined	undefined	undefined	#VALUE!	#VALUE!	#VALUE!	old	#VALUE!	#VALUE!	#VALUE!
							1072148az1_25_Zrn	0.3330	0.0101	0.0464	0.0018		291.86	10.25	292.32	11.35	275.15	81.59	292.317	11.351	3.883	-6.239		young	0.000
							1072148az1_26_Zrn	0.8910	0.0249	0.1087	0.0041		646.89	25.13	665.38	26.48	574.95	72.90	665.384	26.481	3.980	-15.728		old	-15.728		disc. inv
							1072148az1_27_Zrn	6.3197	0.1814	0.3591	0.0148		2021.19	176.27	1977.98	95.30	2065.48	61.23	2065.483	61.233	2.965	4.236		old	4.236
							1072148az1_28_Zrn	1.3539	0.0359	0.1417	0.0054		869.23	36.14	854.06	34.67	904.97	66.85	854.058	34.671	4.060	5.626		old	5.626
							1072148az1_29_Zrn	2.5449	0.0645	0.2193	0.0083		1284.98	64.49	1278.03	53.14	1295.00	61.09	1295.001	61.088	4.717	1.310		old	1.310
							1072148az1_30_Zrn	1.7444	0.0448	0.1695	0.0064		1025.09	44.98	1009.30	41.12	1056.86	63.74	1056.859	63.741	6.031	4.500		old	4.500
							1072148az1_31_Zrn	4.4257	0.1128	0.2997	0.0114		1717.16	111.46	1689.94	73.02	1751.92	57.64	1751.924	57.638	3.290	3.538		old	3.538
							1072148az1_32_Zrn	2.6501	0.0671	0.2241	0.0084		1314.66	67.04	1303.40	54.23	1329.41	60.72	1329.414	60.722	4.568	1.957		old	1.957
							1072148az1_33_Zrn	3.1255	0.0798	0.2459	0.0093		1438.98	79.49	1417.19	59.54	1467.98	59.93	1467.976	59.927	4.082	3.460		old	3.460
							1072148az1_34_Zrn	2.5119	0.0635	0.2180	0.0082		1275.47	63.44	1271.38	52.78	1282.48	61.00	1282.480	60.997	4.756	0.866		old	0.866
							1072148az1_35_Zrn	0.6296	0.0443	0.0739	0.0030		495.85	44.46	459.91	19.47	661.83	154.77	459.907	19.470	4.233	30.510		old	30.510	disc
							1072148az1_36_Zrn	0.0856	0.0038	0.0115	0.0004		83.44	3.90	73.59	2.84	341.14	109.61	73.585	2.840	3.860	78.430		young	0.000
							1072148az1_37_Zrn	1.9267	0.0493	0.1845	0.0070		1090.38	49.49	1091.60	44.78	1092.83	63.29	1092.833	63.294	5.792	0.112		old	0.112
							1072148az1_38_Zrn	3.5755	0.0942	0.2644	0.0100		1544.10	93.48	1512.32	64.42	1585.96	60.36	1585.964	60.356	3.806	4.644		old	4.644
							1072148az1_39_Zrn	2.5801	0.0653	0.2201	0.0083		1295.00	65.20	1282.27	53.25	1312.34	60.81	1312.343	60.815	4.634	2.292		old	2.292
							1072148az1_40_Zrn	0.5661	0.0146	0.0733	0.0028		455.51	14.73	456.05	17.83	449.59	70.38	456.046	17.826	3.909	-1.436		old	-1.436
							1072148az1_41_Zrn	1.6198	0.0408	0.1640	0.0062		977.93	41.03	978.98	39.70	975.50	63.72	978.983	39.703	4.056	-0.357		old	-0.357
							1072148az1_42_Zrn	2.6116	0.0711	0.2207	0.0084		1303.89	70.93	1285.77	53.77	1329.65	63.82	1329.654	63.819	4.800	3.300		old	3.300
							1072148az1_43_Zrn	2.9928	0.0757	0.2415	0.0091		1405.80	75.41	1394.38	58.50	1422.72	59.89	1422.724	59.894	4.210	1.993		old	1.993
							1072148az1_44_Zrn	0.3078	0.0079	0.0434	0.0016		272.44	8.05	273.65	10.55	260.61	72.97	273.645	10.549	3.855	-5.000		young	0.000
							1072148az1_45_Zrn	0.5634	0.0142	0.0726	0.0027		453.73	14.37	451.98	17.66	469.16	69.13	451.978	17.659	3.907	3.662		old	3.662
							1072148az1_46_Zrn	0.6431	0.0167	0.0813	0.0031		504.20	16.84	503.91	19.74	504.85	70.02	503.911	19.737	3.917	0.186		old	0.186
							1072148az1_47_Zrn	4.4783	0.1127	0.2997	0.0113		1726.96	111.32	1689.97	72.64	1771.19	57.06	1771.188	57.058	3.221	4.586		old	4.586
							1072148az1_48_Zrn	5.5952	0.1412	0.3423	0.0129		1915.36	138.54	1897.93	82.97	1938.86	56.02	1938.865	56.017	2.889	2.111		old	2.111
							1072148az1_49_Zrn	0.6924	0.0206	0.0905	0.0034		534.26	20.84	558.38	22.06	426.78	78.17	558.375	22.065	3.952	-30.835		old	-30.835		disc. inv
							1072148az1_50_Zrn	0.2106	0.0065	0.0307	0.0012		194.04	6.60	195.10	7.50	174.57	84.04	195.099	7.502	3.845	-11.759		young	0.000
							1072148az1_51_Zrn	0.5583	0.0145	0.0723	0.0027		450.42	14.70	450.10	17.59	453.28	70.88	450.104	17.586	3.907	0.701		old	0.701
							1072148az1_52_Zrn	0.9860	0.0254	0.1108	0.0042		696.67	25.68	677.43	27.04	756.51	67.09	677.434	27.042	3.992	10.452		old	10.452
							1072148az1_53_Zrn	0.7382	0.0187	0.0904	0.0034		561.35	18.95	557.77	21.90	572.37	68.33	557.770	21.901	3.927	2.550		old	2.550
							1072148az1_54_Zrn	5.0121	0.1260	0.3223	0.0121		1821.36	124.07	1800.74	77.94	1843.24	56.51	1843.239	56.510	3.066	2.306		old	2.306
							1072148az1_55_Zrn	0.6185	0.0157	0.0793	0.0030		488.91	15.91	491.95	19.25	474.49	69.53	491.955	19.251	3.913	-3.681		old	-3.681
							1072148az1_56_Zrn	4.2424	0.1067	0.2951	0.0111		1682.27	105.59	1667.18	71.50	1702.65	57.53	1702.648	57.525	3.379	2.083		old	2.083
							1072148az1_57_Zrn	3.4220	0.0863	0.2575	0.0097		1509.46	85.82	1476.95	62.36	1553.60	58.77	1553.599	58.774	3.783	4.933		old	4.933
							1072148az1_58_Zrn	1.5579	0.0412	0.1586	0.0060		953.63	41.45	948.90	38.55	963.68	66.01	948.904	38.554	4.063	1.533		old	1.533
							1072148az1_59_Zrn	0.1011	0.0047	0.0139	0.0005		97.80	4.80	88.80	3.47	318.21	114.28	88.805	3.467	3.904	72.093		young	0.000
							1072148az1_60_Zrn	2.1392	0.0568	0.1958	0.0074		1161.56	56.84	1152.58	47.83	1173.44	64.21	1173.443	64.209	5.472	1.778		old	1.778
							1072148az1_61_Zrn	0.2148	0.0076	0.0291	0.0011		197.60	7.66	184.87	7.14	338.77	89.94	184.869	7.138	3.861	45.430		young	0.000
							1072148az1_62_Zrn	1.7074	0.0430	0.1688	0.0064		1011.30	43.17	1005.29	40.90	1022.85	63.20	1022.846	63.204	6.179	1.716		old	1.716
							1072148az1_63_Zrn	2.5034	0.0646	0.2200	0.0083		1273.01	64.51	1281.97	53.59	1256.96	62.10	1256.964	62.096	4.940	-1.990		old	-1.990
							1072148az1_64_Zrn	0.7592	0.0207	0.0909	0.0035		573.55	20.95	561.11	22.31	615.91	71.39	561.107	22.307	3.976	8.897		old	8.897
							1072148az1_65_Zrn	3.2903	0.0851	0.2553	0.0096		1478.76	84.63	1465.70	61.93	1501.57	60.16	1501.574	60.163	4.007	2.389		old	2.389
							1072148az1_66_Zrn	0.5660	0.0148	0.0720	0.0027		455.42	15.01	448.05	17.59	497.42	70.66	448.053	17.590	3.926	9.925		old	9.925
							1072148az1_67_Zrn	3.3328	0.0836	0.2581	0.0097		1488.76	83.21	1480.08	62.42	1501.52	58.95	1501.520	58.951	3.926	1.428		old	1.428
							1072148az1_68_Zrn	0.1509	0.0051	0.0214	0.0008		142.66	5.21	136.27	5.24	246.83	89.03	136.265	5.241	3.846	44.794		young	0.000
							1072148az1_69_Zrn	1.8122	0.0459	0.1740	0.0066		1049.89	46.05	1034.13	42.34	1079.14	62.89	1079.141	62.888	5.828	4.171		old	4.171
							1072148az1_70_Zrn	0.0772	0.0032	0.0109	0.0004		75.54	3.29	69.72	2.72	248.78	105.46	69.716	2.716	3.896	71.977		young	0.000
							1072148az1_71_Zrn	undefined	undefined	undefined	undefined		undefined	undefined	undefined	undefined	undefined	undefined	undefined	undefined	#VALUE!	#VALUE!	#VALUE!	old	#VALUE!	#VALUE!	#VALUE!
							1072148az1_72_Zrn	0.2584	0.0166	0.0313	0.0013		233.38	16.77	198.61	8.24	589.19	143.76	198.606	8.235	4.147	66.292		young	0.000
							1072148az1_73_Zrn	1.9595	0.0500	0.1836	0.0069		1101.70	50.13	1086.44	44.52	1130.74	62.74	1130.736	62.736	5.548	3.917		old	3.917
							1072148az1_74_Zrn	3.4861	0.0874	0.2653	0.0100		1524.06	86.87	1516.94	64.18	1532.39	58.67	1532.392	58.674	3.829	1.008		old	1.008
							1072148az1_75_Zrn	4.6705	0.1174	0.3114	0.0117		1761.97	115.84	1747.62	75.37	1777.15	56.91	1777.150	56.913	3.202	1.662		old	1.662
							1072148az1_76_Zrn	0.6540	0.0176	0.0822	0.0031		510.94	17.76	509.04	20.00	519.31	71.57	509.038	20.000	3.929	1.978		old	1.978
							1072148az1_77_Zrn	0.7438	0.0214	0.0926	0.0035		564.61	21.66	570.78	22.74	534.94	75.08	570.782	22.739	3.984	-6.700		old	-6.700		disc. inv
							1072148az1_78_Zrn	1.7810	0.0477	0.1742	0.0066		1038.53	47.89	1035.06	42.37	1037.28	65.83	1037.277	65.826	6.346	0.214		old	0.214
							1072148az1_79_Zrn	2.1743	0.0595	0.1966	0.0074		1172.86	59.55	1156.97	47.81	1191.95	65.27	1191.948	65.269	5.476	2.935		old	2.935
							1072148az1_80_Zrn	1.6621	0.0459	0.1612	0.0061		994.20	46.11	963.30	39.28	1054.66	67.04	963.304	39.282	4.078	8.662		old	8.662
							1072148az1_81_Zrn	0.7160	0.0188	0.0869	0.0033		548.28	19.01	537.19	21.14	593.27	69.57	537.188	21.141	3.935	9.453		old	9.453
							1072148az1_82_Zrn	5.1256	0.1298	0.3268	0.0123		1840.36	127.72	1822.78	79.22	1859.70	56.66	1859.701	56.661	3.047	1.985		old	1.985
							1072148az1_83_Zrn	0.1766	0.0057	0.0247	0.0009		165.09	5.73	157.20	6.05	270.74	84.69	157.197	6.047	3.847	41.939		young	0.000
							1072148az1_84_Zrn	0.0846	0.0028	0.0120	0.0005		82.43	2.82	77.14	2.97	223.72	87.46	77.139	2.966	3.845	65.521		young	0.000
							1072148az1_85_Zrn	1.9374	0.0491	0.1821	0.0069		1094.10	49.29	1078.23	44.26	1124.55	62.60	1124.554	62.598	5.567	4.119		old	4.119
							1072148az1_86_Zrn	2.5302	0.0634	0.2174	0.0082		1280.76	63.39	1268.20	52.66	1302.12	60.41	1302.119	60.409	4.639	2.605		old	2.605
							1072148az1_87_Zrn	2.5572	0.0674	0.2184	0.0083		1288.49	67.34	1273.21	53.08	1308.88	62.66	1308.882	62.663	4.788	2.725		old	2.725
							1072148az1_88_Zrn	0.5998	0.0152	0.0766	0.0029		477.10	15.37	475.67	18.57	483.67	69.20	475.669	18.568	3.904	1.654		old	1.654
							1072148az1_89_Zrn	0.1969	0.0055	0.0281	0.0011		182.52	5.59	178.66	6.84	226.83	77.58	178.657	6.845	3.831	21.238		young	0.000
							1072148az1_90_Zrn	3.6401	0.1186	0.2564	0.0099		1558.34	116.98	1471.65	63.44	1677.87	69.40	1677.870	69.404	4.136	12.291		old	12.291
							1072148az1_91_Zrn	2.3251	0.0584	0.2069	0.0078		1219.97	58.45	1212.05	50.11	1236.62	61.17	1236.621	61.174	4.947	1.987		old	1.987
							1072148az1_92_Zrn	0.6220	0.0157	0.0791	0.0030		491.12	15.87	490.97	19.20	489.13	68.94	490.969	19.196	3.910	-0.376		old	-0.376
							1072148az1_93_Zrn	10.3323	0.2610	0.4569	0.0172		2465.01	249.07	2425.98	110.68	2494.65	52.78	2494.653	52.775	2.116	2.753		old	2.753
							1072148az1_94_Zrn	undefined	undefined	undefined	undefined		undefined	undefined	undefined	undefined	undefined	undefined	undefined	undefined	#VALUE!	#VALUE!	#VALUE!	old	#VALUE!	#VALUE!	#VALUE!
							1072148az1_95_Zrn	1.9531	0.0497	0.1851	0.0070		1099.50	49.86	1094.86	44.91	1112.57	62.79	1112.573	62.787	5.643	1.592		old	1.592
							1072148az1_96_Zrn	3.2923	0.0827	0.2593	0.0098		1479.24	82.32	1486.26	62.78	1471.16	59.21	1471.165	59.213	4.025	-1.026		old	-1.026
							1072148az1_97_Zrn	3.4163	0.0904	0.2557	0.0097		1508.15	89.76	1467.78	62.23	1564.87	60.53	1564.869	60.526	3.868	6.204		old	6.204
							1072148az1_98_Zrn	2.4787	0.0625	0.2146	0.0081		1265.82	62.52	1253.10	52.05	1286.36	60.91	1286.364	60.915	4.735	2.586		old	2.586
							1072148az1_99_Zrn	6.2402	0.1569	0.3608	0.0136		2010.10	153.37	1985.88	87.35	2035.18	55.26	2035.178	55.255	2.715	2.422		old	2.422
							1072148az1_100_Zrn	3.4002	0.0858	0.2589	0.0098		1504.43	85.34	1484.23	62.83	1530.63	58.93	1530.627	58.931	3.850	3.031		old	3.031
							1072148az1_101_Zrn	0.6026	0.0176	0.0813	0.0031		478.85	17.77	503.79	19.87	356.40	77.91	503.788	19.867	3.943	-41.357		old	-41.357		disc. inv
							1072148az1_102_Zrn	1.6140	0.0414	0.1628	0.0062		975.65	41.62	972.58	39.67	979.73	64.44	972.578	39.667	4.079	0.730		old	0.730
							1072148az1_103_Zrn	2.6568	0.0683	0.2280	0.0086		1316.52	68.16	1324.05	55.50	1303.94	61.51	1303.944	61.508	4.717	-1.542		old	-1.542
							1072148az1_104_Zrn	0.0924	0.0028	0.0134	0.0005		89.76	2.86	86.02	3.32	172.12	83.22	86.017	3.316	3.855	50.025		young	0.000
							1072148az1_105_Zrn	2.0481	0.0519	0.1912	0.0072		1131.67	52.02	1127.76	46.46	1138.88	62.38	1138.880	62.378	5.477	0.976		old	0.976
							1072148az1_106_Zrn	0.8580	0.0382	0.0891	0.0034		629.06	38.38	550.44	22.07	899.35	98.93	550.441	22.069	4.009	38.796		old	38.796	disc
							1072148az1_107_Zrn	1.5047	0.0386	0.1564	0.0059		932.29	38.81	936.80	38.11	927.28	64.88	936.797	38.112	4.068	-1.026		old	-1.026
							1072148az1_108_Zrn	3.3477	0.0846	0.2561	0.0097		1492.27	84.18	1469.86	62.26	1521.17	59.07	1521.167	59.070	3.883	3.373		old	3.373
							1072148az1_109_Zrn	0.1708	0.0054	0.0238	0.0009		160.15	5.52	151.87	5.86	276.57	84.47	151.875	5.858	3.857	45.087		young	0.000
							1072148az1_110_Zrn	1.8938	0.0481	0.1811	0.0068		1078.91	48.27	1072.82	44.00	1090.13	63.03	1090.134	63.025	5.781	1.588		old	1.588
104	U92	48	UMW1003	1072-151	5.2346590	-73.4539370																						1069510	1070323	0.0000	0.0000		99	4	1	0	Picacho tope	Early-Middle Eocene		Early - Middle Eocene	Middle Eocene	Middle Eocene	3	3	This work
							1072151az1_1_Zrn	0.8669	0.0208	0.1033	0.0036		633.89	21.03	633.48	22.97	634.11	63.22	633.479	22.966	3.625	0.100		old	0.100
							1072151az1_2_Zrn	0.1642	0.0053	0.0232	0.0008		154.35	5.38	147.58	5.18	254.55	83.69	147.581	5.179	3.509	42.024		young	0.000
							1072151az1_3_Zrn	3.3436	0.0810	0.2575	0.0089		1491.29	80.64	1477.11	57.22	1511.12	55.83	1511.123	55.831	3.695	2.251		old	2.251
							1072151az1_4_Zrn	0.1589	0.0047	0.0229	0.0008		149.78	4.73	145.96	5.15	212.42	78.42	145.959	5.153	3.530	31.289		young	0.000
							1072151az1_5_Zrn	undefined	undefined	undefined	undefined		undefined	undefined	undefined	undefined	undefined	undefined	undefined	undefined	#VALUE!	#VALUE!	#VALUE!	old	#VALUE!	#VALUE!	#VALUE!
							1072151az1_6_Zrn	2.7988	0.0648	0.2350	0.0081		1355.21	64.78	1360.59	52.02	1345.40	55.40	1345.396	55.399	4.118	-1.130		old	-1.130
							1072151az1_7_Zrn	3.1181	0.0742	0.2480	0.0086		1437.17	73.96	1428.32	55.03	1446.77	55.61	1446.772	55.607	3.844	1.276		old	1.276
							1072151az1_8_Zrn	1.4638	0.0418	0.1500	0.0052		915.56	42.04	901.04	33.61	935.35	68.31	901.037	33.606	3.730	3.669		old	3.669
							1072151az1_9_Zrn	0.6203	0.0178	0.0786	0.0027		490.01	17.99	487.96	17.61	497.08	73.34	487.957	17.610	3.609	1.835		old	1.835
							1072151az1_10_Zrn	3.2836	0.0779	0.2574	0.0089		1477.17	77.64	1476.62	57.16	1477.10	55.37	1477.101	55.366	3.748	0.033		old	0.033
							1072151az1_11_Zrn	3.1546	0.0736	0.2505	0.0086		1446.12	73.38	1440.94	55.54	1451.67	54.89	1451.666	54.886	3.781	0.739		old	0.739
							1072151az1_12_Zrn	4.6412	0.1102	0.3055	0.0106		1756.72	108.87	1718.29	67.89	1796.95	53.17	1796.945	53.167	2.959	4.377		old	4.377
							1072151az1_13_Zrn	3.1202	0.0723	0.2454	0.0085		1437.69	72.14	1414.88	54.56	1471.16	54.54	1471.163	54.544	3.708	3.825		old	3.825
							1072151az1_14_Zrn	4.0384	0.0955	0.2878	0.0099		1641.96	94.77	1630.54	63.73	1654.39	53.90	1654.395	53.897	3.258	1.442		old	1.442
							1072151az1_15_Zrn	2.4715	0.0570	0.2149	0.0074		1263.73	57.08	1254.70	47.59	1277.72	55.78	1277.720	55.776	4.365	1.802		old	1.802
							1072151az1_16_Zrn	2.4835	0.0579	0.2163	0.0075		1267.23	57.92	1262.54	48.00	1276.19	56.17	1276.188	56.169	4.401	1.070		old	1.070
							1072151az1_17_Zrn	4.4000	0.1018	0.3021	0.0104		1712.34	100.85	1701.93	66.91	1723.82	52.68	1723.819	52.684	3.056	1.270		old	1.270
							1072151az1_18_Zrn	4.2206	0.0974	0.2934	0.0101		1678.04	96.59	1658.61	64.98	1701.78	52.74	1701.783	52.740	3.099	2.537		old	2.537
							1072151az1_19_Zrn	4.3947	0.1020	0.2992	0.0103		1711.34	100.98	1687.41	66.50	1740.63	52.71	1740.626	52.710	3.028	3.057		old	3.057
							1072151az1_20_Zrn	4.2464	0.0991	0.2914	0.0101		1683.04	98.19	1648.40	64.85	1725.63	52.98	1725.632	52.979	3.070	4.476		old	4.476
							1072151az1_21_Zrn	3.2307	0.0762	0.2496	0.0087		1464.57	75.90	1436.63	55.71	1505.69	54.89	1505.688	54.891	3.646	4.586		old	4.586
							1072151az1_22_Zrn	undefined	undefined	undefined	undefined		undefined	undefined	undefined	undefined	undefined	undefined	undefined	undefined	#VALUE!	#VALUE!	#VALUE!	old	#VALUE!	#VALUE!	#VALUE!
							1072151az1_23_Zrn	undefined	undefined	undefined	undefined		undefined	undefined	undefined	undefined	undefined	undefined	undefined	undefined	#VALUE!	#VALUE!	#VALUE!	old	#VALUE!	#VALUE!	#VALUE!
							1072151az1_24_Zrn	2.0161	0.0471	0.1912	0.0066		1120.93	47.29	1127.91	42.35	1104.50	57.66	1104.503	57.662	5.221	-2.119		old	-2.119
							1072151az1_25_Zrn	1.9839	0.0469	0.1861	0.0064		1110.05	47.06	1100.14	41.25	1125.42	57.90	1125.420	57.903	5.145	2.246		old	2.246
							1072151az1_26_Zrn	4.8817	0.1147	0.3117	0.0108		1799.11	113.22	1748.95	69.61	1857.27	52.37	1857.273	52.368	2.820	5.832		old	5.832
							1072151az1_27_Zrn	undefined	undefined	undefined	undefined		undefined	undefined	undefined	undefined	undefined	undefined	undefined	undefined	#VALUE!	#VALUE!	#VALUE!	old	#VALUE!	#VALUE!	#VALUE!
							1072151az1_28_Zrn	2.4954	0.0583	0.2160	0.0075		1270.69	58.40	1260.68	47.99	1289.66	56.23	1289.659	56.234	4.360	2.247		old	2.247
							1072151az1_29_Zrn	0.2491	0.0059	0.0352	0.0012		225.85	5.99	223.25	7.86	255.12	66.90	223.251	7.861	3.521	12.492		young	0.000
							1072151az1_30_Zrn	1.7844	0.0426	0.1747	0.0060		1039.77	42.79	1038.17	38.81	1046.31	59.01	1046.307	59.015	5.640	0.777		old	0.777
							1072151az1_31_Zrn	0.2923	0.0071	0.0412	0.0014		260.36	7.18	259.96	9.14	258.86	67.86	259.963	9.141	3.516	-0.426		young	0.000
							1072151az1_32_Zrn	2.6399	0.0621	0.2224	0.0077		1311.82	62.10	1294.36	49.32	1339.56	56.05	1339.555	56.045	4.184	3.374		old	3.374
							1072151az1_33_Zrn	1.6726	0.0393	0.1660	0.0057		998.17	39.54	989.85	36.89	1016.03	58.61	989.852	36.886	3.726	2.577		old	2.577
							1072151az1_34_Zrn	0.3048	0.0077	0.0440	0.0015		270.17	7.83	277.33	9.81	197.94	70.77	277.334	9.809	3.537	-40.112		young	0.000
							1072151az1_35_Zrn	4.4694	0.1031	0.3024	0.0104		1725.32	102.10	1703.30	66.96	1751.19	52.36	1751.187	52.356	2.990	2.735		old	2.735
							1072151az1_36_Zrn	2.9237	0.0677	0.2379	0.0082		1388.05	67.56	1375.54	52.75	1411.66	54.88	1411.658	54.878	3.887	2.559		old	2.559
							1072151az1_37_Zrn	2.8099	0.0682	0.2257	0.0080		1358.18	68.14	1311.86	51.47	1422.04	57.00	1422.041	56.998	4.008	7.748		old	7.748
							1072151az1_38_Zrn	4.3306	0.1002	0.2993	0.0103		1699.20	99.27	1687.61	66.27	1710.09	52.75	1710.089	52.754	3.085	1.315		old	1.315
							1072151az1_39_Zrn	2.5392	0.0596	0.2199	0.0076		1283.34	59.62	1281.17	48.95	1284.63	56.30	1284.633	56.304	4.383	0.269		old	0.269
							1072151az1_40_Zrn	4.3086	0.1017	0.2953	0.0103		1695.01	100.71	1668.18	66.00	1721.94	53.42	1721.941	53.421	3.102	3.122		old	3.122
							1072151az1_41_Zrn	3.2409	0.0761	0.2531	0.0088		1467.01	75.88	1454.31	56.32	1484.87	54.88	1484.872	54.876	3.696	2.058		old	2.058
							1072151az1_42_Zrn	0.2916	0.0081	0.0412	0.0014		259.80	8.21	260.30	9.30	255.29	74.90	260.300	9.302	3.573	-1.962		young	0.000
							1072151az1_43_Zrn	3.2306	0.0754	0.2532	0.0087		1464.54	75.18	1455.10	56.28	1477.25	54.67	1477.250	54.669	3.701	1.499		old	1.499
							1072151az1_44_Zrn	0.2295	0.0057	0.0329	0.0011		209.77	5.78	208.60	7.33	219.14	69.54	208.598	7.333	3.515	4.811		young	0.000
							1072151az1_45_Zrn	3.6377	0.0851	0.2729	0.0094		1557.82	84.60	1555.73	60.64	1571.34	54.07	1571.336	54.066	3.441	0.993		old	0.993
							1072151az1_46_Zrn	0.3081	0.0088	0.0419	0.0015		272.74	8.94	264.48	9.45	334.28	75.49	264.478	9.448	3.572	20.882		young	0.000
							1072151az1_47_Zrn	3.7560	0.2627	0.2339	0.0173		1583.39	250.59	1355.03	111.33	1886.20	70.66	1886.197	70.662	3.746	28.161		old	28.161	disc
							1072151az1_48_Zrn	undefined	undefined	undefined	undefined		undefined	undefined	undefined	undefined	undefined	undefined	undefined	undefined	#VALUE!	#VALUE!	#VALUE!	old	#VALUE!	#VALUE!	#VALUE!
							1072151az1_49_Zrn	1.6071	0.0394	0.1642	0.0057		972.97	39.65	979.84	36.84	939.08	61.20	979.839	36.842	3.760	-4.341		old	-4.341
							1072151az1_50_Zrn	3.4901	0.0846	0.2645	0.0092		1524.98	84.11	1513.04	59.11	1538.17	55.49	1538.174	55.486	3.607	1.634		old	1.634
							1072151az1_51_Zrn	3.3242	0.0790	0.2505	0.0087		1486.74	78.71	1440.91	56.02	1552.15	54.82	1552.155	54.818	3.532	7.167		old	7.167
							1072151az1_52_Zrn	0.0459	0.0019	0.0067	0.0002		45.53	1.89	42.73	1.54	194.91	102.55	42.731	1.541	3.605	78.076		young	0.000
							1072151az1_53_Zrn	undefined	undefined	undefined	undefined		undefined	undefined	undefined	undefined	undefined	undefined	undefined	undefined	#VALUE!	#VALUE!	#VALUE!	old	#VALUE!	#VALUE!	#VALUE!
							1072151az1_54_Zrn	0.7403	0.0183	0.0899	0.0031		562.58	18.51	555.11	20.19	586.29	64.88	555.113	20.194	3.638	5.318		old	5.318
							1072151az1_55_Zrn	1.5460	0.0388	0.1565	0.0055		948.89	38.99	937.43	35.49	971.35	61.71	937.426	35.492	3.786	3.492		old	3.492
							1072151az1_56_Zrn	3.4837	0.0832	0.2665	0.0093		1523.52	82.73	1523.14	59.98	1520.13	55.35	1520.129	55.350	3.641	-0.198		old	-0.198
							1072151az1_57_Zrn	3.7207	0.0971	0.2601	0.0093		1575.82	96.30	1490.38	60.12	1694.98	56.68	1694.980	56.678	3.344	12.071		old	12.071
							1072151az1_58_Zrn	0.7493	0.0198	0.0901	0.0032		567.84	20.03	556.27	20.47	607.94	67.66	556.274	20.473	3.680	8.499		old	8.499
							1072151az1_59_Zrn	undefined	undefined	undefined	undefined		undefined	undefined	undefined	undefined	undefined	undefined	undefined	undefined	#VALUE!	#VALUE!	#VALUE!	old	#VALUE!	#VALUE!	#VALUE!
							1072151az1_60_Zrn	0.8464	0.0227	0.1007	0.0036		622.66	22.92	618.24	23.02	638.29	68.10	618.237	23.024	3.724	3.141		old	3.141
							1072151az1_61_Zrn	3.4620	0.0822	0.2690	0.0094		1518.61	81.82	1535.66	60.15	1492.50	55.22	1492.501	55.219	3.700	-2.892		old	-2.892
							1072151az1_62_Zrn	0.9794	0.0246	0.1116	0.0039		693.31	24.81	682.09	25.40	731.28	64.56	682.093	25.405	3.725	6.726		old	6.726
							1072151az1_63_Zrn	4.8083	0.1134	0.3125	0.0109		1786.35	111.97	1753.12	69.75	1821.00	52.81	1820.997	52.815	2.900	3.728		old	3.728
							1072151az1_64	0.8158	0.0362	0.0926	0.0034		605.71	36.41	571.17	21.64	717.41	100.57	571.168	21.642	3.789	20.385		old	20.385
							1072151az1_65_Zrn	4.5622	0.1063	0.3072	0.0106		1742.38	105.14	1726.77	68.19	1758.78	52.59	1758.777	52.587	2.990	1.820		old	1.820
							1072151az1_66_Zrn	1.7221	0.0408	0.1694	0.0059		1016.82	41.00	1008.72	38.05	1035.69	58.90	1035.692	58.896	5.687	2.604		old	2.604
							1072151az1_67_Zrn	3.9967	0.0981	0.2830	0.0100		1633.52	97.27	1606.53	64.11	1659.00	54.86	1659.001	54.864	3.307	3.163		old	3.163
							1072151az1_68_Zrn	4.4261	0.1064	0.3033	0.0106		1717.23	105.28	1707.80	68.33	1727.04	53.82	1727.040	53.821	3.116	1.114		old	1.114
							1072151az1_69_Zrn	3.4683	0.0821	0.2657	0.0092		1520.05	81.70	1518.72	59.48	1516.91	54.95	1516.913	54.945	3.622	-0.119		old	-0.119
							1072151az1_70_Zrn	6.7998	0.1616	0.3747	0.0131		2085.70	157.77	2051.42	83.86	2122.68	51.13	2122.676	51.128	2.409	3.357		old	3.357
							1072151az1_71_Zrn	2.8838	0.0688	0.2360	0.0082		1377.69	68.65	1365.89	52.79	1395.27	55.96	1395.269	55.958	4.011	2.106		old	2.106
							1072151az1_72_Zrn	1.8096	0.0507	0.1746	0.0062		1048.92	50.83	1037.33	39.69	1062.14	65.56	1062.139	65.561	6.173	2.336		old	2.336
							1072151az1_73_Zrn	5.1314	0.1193	0.3297	0.0114		1841.32	117.69	1836.92	73.25	1843.98	52.04	1843.981	52.042	2.822	0.383		old	0.383
							1072151az1_74_Zrn	2.2869	0.0540	0.2051	0.0071		1208.25	54.11	1202.88	45.72	1217.86	57.07	1217.861	57.070	4.686	1.230		old	1.230
							1072151az1_75_Zrn	1.4196	0.0338	0.1495	0.0052		897.21	33.99	898.26	33.56	899.03	60.23	898.259	33.556	3.736	0.086		old	0.086
							1072151az1_76_Zrn	1.4895	0.0378	0.1576	0.0055		926.11	38.02	943.46	35.73	881.88	63.26	943.458	35.727	3.787	-6.983		old	-6.983		disc. inv
							1072151az1_77_Zrn	3.4308	0.0839	0.2631	0.0093		1511.48	83.47	1505.53	59.89	1522.06	55.79	1522.056	55.790	3.665	1.086		old	1.086
							1072151az1_78_Zrn	0.8536	0.0207	0.0980	0.0035		626.62	20.88	602.83	22.26	705.74	62.75	602.835	22.264	3.693	14.581		old	14.581
							1072151az1_79_Zrn	2.6833	0.0671	0.2250	0.0080		1323.87	66.99	1308.01	51.47	1349.02	58.09	1349.023	58.088	4.306	3.040		old	3.040
							1072151az1_80_Zrn	0.4160	0.0113	0.0553	0.0020		353.22	11.40	346.75	12.98	388.67	70.78	346.748	12.983	3.744	10.786		old	10.786
							1072151az1_81_Zrn	5.1727	0.1270	0.3228	0.0114		1848.13	124.99	1803.39	73.41	1895.47	53.53	1895.468	53.532	2.824	4.858		old	4.858
							1072151az1_82	undefined	undefined	undefined	undefined		undefined	undefined	undefined	undefined	undefined	undefined	undefined	undefined	#VALUE!	#VALUE!	#VALUE!	old	#VALUE!	#VALUE!	#VALUE!
							1072151az1_83_Zrn	3.7188	0.0914	0.2737	0.0097		1575.42	90.75	1559.80	62.38	1589.72	55.32	1589.725	55.322	3.480	1.882		old	1.882
							1072151az1_84_Zrn	5.3339	0.1322	0.3354	0.0119		1874.31	130.02	1864.36	76.48	1882.36	53.58	1882.362	53.582	2.847	0.956		old	0.956
							1072151az1_85_Zrn	undefined	undefined	undefined	undefined		undefined	undefined	undefined	undefined	undefined	undefined	undefined	undefined	#VALUE!	#VALUE!	#VALUE!	old	#VALUE!	#VALUE!	#VALUE!
							1072151az1_86_Zrn	4.8134	0.1152	0.3142	0.0110		1787.25	113.71	1761.19	70.47	1815.67	53.14	1815.674	53.141	2.927	3.001		old	3.001
							1072151az1_87_Zrn	1.2170	0.0295	0.1309	0.0046		808.40	29.75	793.21	29.60	850.14	61.54	793.208	29.599	3.732	6.697		old	6.697
							1072151az1_88_Zrn	3.3487	0.0785	0.2622	0.0091		1492.48	78.23	1500.85	58.37	1483.16	54.75	1483.162	54.750	3.691	-1.192		old	-1.192
							1072151az1_89_Zrn	3.4143	0.0812	0.2653	0.0092		1507.70	80.86	1517.02	59.29	1491.86	55.19	1491.856	55.187	3.699	-1.687		old	-1.687
							1072151az1_90_Zrn	3.3415	0.0781	0.2615	0.0090		1490.80	77.81	1497.41	58.04	1482.18	54.63	1482.175	54.630	3.686	-1.028		old	-1.028
							1072151az1_91_Zrn	3.4136	0.0801	0.2612	0.0091		1507.54	79.74	1496.18	58.28	1525.06	54.46	1525.062	54.459	3.571	1.894		old	1.894
							1072151az1_92_Zrn	5.3887	0.1267	0.3325	0.0115		1883.05	124.73	1850.62	74.16	1916.75	51.85	1916.753	51.847	2.705	3.450		old	3.450
							1072151az1_93_Zrn	1.8142	0.0943	0.1727	0.0098		1050.61	93.55	1027.09	63.08	1088.72	100.98	1088.716	100.982	9.275	5.661		old	5.661
							1072151az1_94_Zrn	0.0866	0.0035	0.0124	0.0005		84.38	3.59	79.62	3.15	200.71	101.45	79.617	3.150	3.956	60.332		young	0.000
							1072151az1_95_Zrn	0.3110	0.0105	0.0414	0.0015		274.99	10.59	261.76	9.66	364.29	84.53	261.755	9.659	3.690	28.146		young	0.000
							1072151az1_96_Zrn	3.0028	0.0726	0.2396	0.0084		1408.32	72.38	1384.42	54.03	1443.31	56.18	1443.308	56.185	3.893	4.080		old	4.080
							1072151az1_97_Zrn	4.5620	0.1125	0.2921	0.0104		1742.36	111.12	1652.26	66.88	1851.02	53.43	1851.023	53.434	2.887	10.738		old	10.738
							1072151az1_98_Zrn	undefined	undefined	undefined	undefined		undefined	undefined	undefined	undefined	undefined	undefined	undefined	undefined	#VALUE!	#VALUE!	#VALUE!	old	#VALUE!	#VALUE!	#VALUE!
							1072151az1_99_Zrn	0.3250	0.0108	0.0423	0.0015		285.73	10.94	266.88	9.95	426.69	82.32	266.877	9.953	3.729	37.454		young	0.000
							1072151az1_100_Zrn	3.0965	0.0800	0.2289	0.0083		1431.83	79.68	1328.60	53.61	1581.63	56.57	1581.625	56.566	3.576	15.998		old	15.998
							1072151az1_101_Zrn	4.7786	0.1201	0.3005	0.0108		1781.14	118.39	1693.99	69.26	1880.78	54.59	1880.784	54.593	2.903	9.932		old	9.932
							1072151az1_102_Zrn	1.6127	0.0444	0.1617	0.0058		975.16	44.62	966.30	37.60	982.34	65.71	966.305	37.595	3.891	1.632		old	1.632
							1072151az1_103_Zrn	4.8220	0.1192	0.3147	0.0112		1788.74	117.53	1763.83	71.77	1811.66	54.29	1811.657	54.289	2.997	2.640		old	2.640
							1072151az1_104_Zrn	5.2844	0.1337	0.3366	0.0121		1866.35	131.39	1870.16	77.99	1860.80	54.95	1860.799	54.948	2.953	-0.503		old	-0.503
							1072151az1_105_Zrn	1.1215	0.0301	0.1205	0.0044		763.67	30.37	733.45	28.33	868.83	64.57	733.450	28.333	3.863	15.582		old	15.582
							1072151az1_106_Zrn	1.2765	0.0335	0.1353	0.0049		835.30	33.71	817.78	31.56	878.77	63.62	817.780	31.558	3.859	6.940		old	6.940
							1072151az1_107_Zrn	5.5256	0.1386	0.3374	0.0121		1904.59	136.04	1874.14	77.65	1929.34	54.17	1929.339	54.173	2.808	2.861		old	2.861
							1072151az1_108_Zrn	4.0048	0.0991	0.2874	0.0102		1635.18	98.20	1628.64	65.65	1648.96	55.38	1648.965	55.376	3.358	1.233		old	1.233
							1072151az1_109_Zrn	3.2878	0.0822	0.2561	0.0091		1478.16	81.78	1469.63	58.76	1477.65	57.30	1477.646	57.300	3.878	0.542		old	0.542
							1072151az1_110_Zrn	0.3124	0.0079	0.0432	0.0015		276.02	7.97	272.44	9.74	299.43	69.19	272.439	9.737	3.574	9.014		young	0.000
105	U93	49	UMW-1004	1072-152	5.2373330	-73.4511110																						1069823	1070619	0.0000	0.0000		97	4	1	0	Concentraci?n	Early-Middle Eocene		Middle Eocene - Early Oligocene	Middle Eocene - Late Oligocene	Middle Eocene - Late Eocene	3	3	This work
							1072152az1_1_Zrn	4.9118	0.1129	0.3269	0.0112		1804.29	111.52	1823.47	72.27	1781.90	52.04	1781.902	52.043	2.921	-2.333		old	-2.333
							1072152az1_2_Zrn	0.0997	0.0026	0.0146	0.0005		96.50	2.62	93.64	3.27	161.61	72.28	93.644	3.267	3.489	42.054		young	0.000
							1072152az1_3_Zrn	4.9245	0.1135	0.3246	0.0112		1806.47	112.12	1811.92	71.73	1799.94	52.03	1799.940	52.027	2.891	-0.665		old	-0.665
							1072152az1_4_Zrn	4.8051	0.1112	0.3188	0.0110		1785.79	109.86	1783.88	70.65	1788.24	52.26	1788.235	52.260	2.922	0.244		old	0.244
							1072152az1_5_Zrn	3.3883	0.0809	0.2552	0.0088		1501.69	80.50	1465.46	56.81	1555.55	54.93	1555.549	54.929	3.531	5.792		old	5.792
							1072152az1_6_Zrn	0.7686	0.0181	0.0947	0.0033		578.94	18.31	583.39	21.10	564.62	63.15	583.391	21.098	3.616	-3.325		old	-3.325
							1072152az1_7_Zrn	2.9856	0.0692	0.2409	0.0083		1403.97	69.09	1391.56	53.33	1419.88	54.85	1419.884	54.852	3.863	1.995		old	1.995
							1072152az1_8_Zrn	2.9209	0.0689	0.2417	0.0083		1387.35	68.81	1395.44	53.61	1373.15	55.90	1373.151	55.904	4.071	-1.623		old	-1.623
							1072152az1_9_Zrn	3.1208	0.0761	0.2466	0.0085		1437.83	75.88	1421.14	54.89	1456.13	56.53	1456.125	56.529	3.882	2.403		old	2.403
							1072152az1_10_Zrn	4.4478	0.1040	0.2970	0.0103		1721.28	102.91	1676.63	66.34	1777.25	52.69	1777.252	52.686	2.964	5.662		old	5.662
							1072152az1_11_Zrn	1.4175	0.0339	0.1476	0.0051		896.31	34.17	887.38	32.85	916.33	60.33	887.376	32.850	3.702	3.160		old	3.160
							1072152az1_12_Zrn	3.3424	0.0790	0.2568	0.0089		1491.01	78.62	1473.62	57.11	1515.22	54.79	1515.223	54.788	3.616	2.746		old	2.746
							1072152az1_13_Zrn	0.7227	0.0189	0.0897	0.0031		552.27	19.08	553.97	20.18	543.48	68.22	553.972	20.175	3.642	-1.931		old	-1.931
							1072152az1_14_Zrn	1.7008	0.0483	0.1690	0.0060		1008.84	48.49	1006.44	38.33	1008.07	67.45	1008.070	67.450	6.691	0.161		old	0.161
							1072152az1_15_Zrn	2.8925	0.0671	0.2353	0.0081		1379.97	66.97	1362.19	52.19	1407.99	54.95	1407.991	54.947	3.903	3.253		old	3.253
							1072152az1_16_Zrn	3.1044	0.0722	0.2467	0.0085		1433.78	72.05	1421.27	54.81	1451.19	54.74	1451.186	54.740	3.772	2.062		old	2.062
							1072152az1_17_Zrn	3.3691	0.0787	0.2588	0.0089		1497.23	78.40	1483.71	57.44	1521.11	54.39	1521.111	54.392	3.576	2.459		old	2.459
							1072152az1_18_Zrn	0.1695	0.0048	0.0237	0.0008		159.01	4.91	150.95	5.29	273.61	76.21	150.950	5.294	3.507	44.829		young	0.000
							1072152az1_19_Zrn	undefined	undefined	undefined	undefined		undefined	undefined	undefined	undefined	undefined	undefined	undefined	undefined	#VALUE!	#VALUE!	#VALUE!	old	#VALUE!	#VALUE!	#VALUE!
							1072152az1_20_Zrn	4.6217	0.1068	0.3090	0.0106		1753.19	105.63	1735.87	68.44	1773.67	52.31	1773.670	52.305	2.949	2.131		old	2.131
							1072152az1_21_Zrn	0.5983	0.0142	0.0759	0.0026		476.17	14.37	471.33	16.86	496.71	64.18	471.327	16.862	3.577	5.109		old	5.109
							1072152az1_22_Zrn	4.4329	0.1028	0.2988	0.0103		1718.52	101.83	1685.11	66.42	1760.53	52.53	1760.527	52.534	2.984	4.284		old	4.284
							1072152az1_23_Zrn	1.2640	0.0324	0.1414	0.0049		829.71	32.68	852.68	31.63	762.04	64.91	852.685	31.632	3.710	-11.895		old	-11.895		disc. inv
							1072152az1_24_Zrn	4.3449	0.1005	0.2977	0.0103		1701.92	99.58	1680.12	65.93	1727.72	52.64	1727.716	52.641	3.047	2.755		old	2.755
							1072152az1_25_Zrn	3.3589	0.0784	0.2598	0.0090		1494.86	78.06	1488.71	57.59	1501.64	54.52	1501.635	54.522	3.631	0.861		old	0.861
							1072152az1_26_Zrn	4.6936	0.1092	0.3118	0.0108		1766.09	108.00	1749.32	69.24	1787.94	52.47	1787.938	52.469	2.935	2.160		old	2.160
							1072152az1_27_Zrn	2.6380	0.0634	0.2234	0.0078		1311.29	63.36	1299.92	50.14	1331.21	56.79	1331.212	56.792	4.266	2.351		old	2.351
							1072152az1_28_Zrn	0.6834	0.0173	0.0827	0.0029		528.84	17.49	512.47	18.55	594.49	66.10	512.466	18.547	3.619	13.797		old	13.797
							1072152az1_29_Zrn	3.9400	0.0924	0.2814	0.0097		1621.93	91.67	1598.31	62.66	1650.08	53.56	1650.082	53.558	3.246	3.137		old	3.137
							1072152az1_30_Zrn	undefined	undefined	undefined	undefined		undefined	undefined	undefined	undefined	undefined	undefined	undefined	undefined	#VALUE!	#VALUE!	#VALUE!	old	#VALUE!	#VALUE!	#VALUE!
							1072152az1_31_Zrn	0.0428	0.0018	0.0059	0.0002		42.56	1.84	37.63	1.37	322.64	103.95	37.626	1.369	3.639	88.338		young	0.000
							1072152az1_32_Zrn	3.5596	0.0846	0.2681	0.0093		1540.59	84.18	1531.06	59.88	1548.54	54.80	1548.543	54.804	3.539	1.129		old	1.129
							1072152az1_33_Zrn	2.7898	0.0693	0.2273	0.0080		1352.81	69.17	1320.13	51.24	1404.60	57.64	1404.604	57.638	4.103	6.014		old	6.014
							1072152az1_34_Zrn	2.8458	0.0688	0.2267	0.0079		1367.70	68.71	1317.27	51.04	1451.52	56.23	1451.522	56.226	3.874	9.249		old	9.249
							1072152az1_35_Zrn	5.3287	0.1246	0.3390	0.0117		1873.48	122.69	1881.88	75.18	1865.45	52.08	1865.453	52.080	2.792	-0.881		old	-0.881
							1072152az1_36_Zrn	2.5359	0.0592	0.2191	0.0076		1282.40	59.28	1276.92	48.75	1292.77	56.12	1292.768	56.120	4.341	1.226		old	1.226
							1072152az1_37_Zrn	3.2101	0.0752	0.2527	0.0087		1459.60	74.92	1452.56	56.07	1470.50	54.84	1470.499	54.836	3.729	1.220		old	1.220
							1072152az1_38_Zrn	undefined	undefined	undefined	undefined		undefined	undefined	undefined	undefined	undefined	undefined	undefined	undefined	#VALUE!	#VALUE!	#VALUE!	old	#VALUE!	#VALUE!	#VALUE!
							1072152az1_39_Zrn	3.3212	0.0773	0.2555	0.0088		1486.06	76.96	1466.52	56.72	1513.19	54.28	1513.187	54.285	3.587	3.084		old	3.084
							1072152az1_40_Zrn	2.4716	0.0572	0.2167	0.0075		1263.77	57.26	1264.47	48.02	1265.01	55.97	1265.012	55.969	4.424	0.043		old	0.043
							1072152az1_41_Zrn	3.0442	0.0733	0.2460	0.0085		1418.79	73.10	1417.90	54.67	1417.81	56.40	1417.809	56.398	3.978	-0.006		old	-0.006
							1072152az1_42_Zrn	3.1077	0.0738	0.2420	0.0085		1434.59	73.60	1396.86	54.43	1494.00	55.23	1493.999	55.226	3.697	6.502		old	6.502
							1072152az1_43_Zrn	3.0099	0.0841	0.2391	0.0083		1410.14	83.68	1381.88	53.47	1449.47	62.25	1449.469	62.255	4.295	4.663		old	4.663
							1072152az1_44_Zrn	4.8488	0.1121	0.3197	0.0110		1793.41	110.76	1788.05	70.82	1800.89	52.13	1800.893	52.126	2.894	0.713		old	0.713
							1072152az1_45_Zrn	2.1559	0.0520	0.1963	0.0068		1166.94	52.13	1155.26	43.72	1188.81	58.24	1188.805	58.239	4.899	2.822		old	2.822
							1072152az1_46_Zrn	undefined	undefined	undefined	undefined		undefined	undefined	undefined	undefined	undefined	undefined	undefined	undefined	#VALUE!	#VALUE!	#VALUE!	old	#VALUE!	#VALUE!	#VALUE!
							1072152az1_47_Zrn	1.4302	0.0333	0.1497	0.0052		901.65	33.52	899.18	33.23	910.46	59.19	899.178	33.232	3.696	1.240		old	1.240
							1072152az1_48_Zrn	4.5390	0.1062	0.3086	0.0107		1738.16	105.04	1733.65	68.63	1742.71	53.02	1742.712	53.019	3.042	0.520		old	0.520
							1072152az1_49_Zrn	1.8569	0.0433	0.1782	0.0061		1065.88	43.46	1057.22	39.54	1093.33	57.66	1093.326	57.659	5.274	3.302		old	3.302
							1072152az1_50_Zrn	undefined	undefined	undefined	undefined		undefined	undefined	undefined	undefined	undefined	undefined	undefined	undefined	#VALUE!	#VALUE!	#VALUE!	old	#VALUE!	#VALUE!	#VALUE!
							1072152az1_51_Zrn	0.1543	0.0072	0.0216	0.0008		145.66	7.31	137.85	4.99	269.12	114.18	137.850	4.991	3.621	48.777		young	0.000
							1072152az1_52_Zrn	undefined	undefined	undefined	undefined		undefined	undefined	undefined	undefined	undefined	undefined	undefined	undefined	#VALUE!	#VALUE!	#VALUE!	old	#VALUE!	#VALUE!	#VALUE!
							1072152az1_53_Zrn	3.2773	0.0757	0.2565	0.0088		1475.68	75.46	1471.81	56.82	1480.75	54.30	1480.746	54.299	3.667	0.604		old	0.604
							1072152az1_54_Zrn	1.7956	0.0440	0.1725	0.0060		1043.87	44.18	1025.67	38.39	1083.99	59.70	1083.992	59.704	5.508	5.380		old	5.380
							1072152az1_55_Zrn	3.4353	0.0804	0.2572	0.0089		1512.51	80.02	1475.69	57.36	1565.36	54.08	1565.360	54.080	3.455	5.728		old	5.728
							1072152az1_56_Zrn	0.6412	0.0153	0.0794	0.0027		503.02	15.50	492.83	17.70	550.51	63.87	492.831	17.702	3.592	10.478		old	10.478
							1072152az1_57_Zrn	2.5131	0.0605	0.2144	0.0074		1275.84	60.54	1252.38	47.75	1321.53	57.06	1321.531	57.061	4.318	5.233		old	5.233
							1072152az1_58_Zrn	3.2170	0.0774	0.2510	0.0087		1461.27	77.13	1443.63	55.74	1488.10	55.71	1488.096	55.706	3.743	2.988		old	2.988
							1072152az1_59_Zrn	0.0781	0.0024	0.0111	0.0004		76.35	2.44	71.45	2.50	225.38	81.08	71.446	2.498	3.496	68.299		young	0.000
							1072152az1_60_Zrn	0.2910	0.0072	0.0411	0.0014		259.37	7.34	259.79	9.24	255.84	69.24	259.789	9.238	3.556	-1.545		young	0.000
							1072152az1_61_Zrn	0.5873	0.0147	0.0741	0.0026		469.11	14.84	460.66	16.59	502.75	66.52	460.660	16.588	3.601	8.372		old	8.372
							1072152az1_62_Zrn	3.0496	0.0709	0.2444	0.0084		1420.13	70.79	1409.50	54.19	1438.72	54.86	1438.721	54.861	3.813	2.031		old	2.031
							1072152az1_63_Zrn	3.4590	0.0798	0.2627	0.0090		1517.92	79.44	1503.82	58.20	1538.83	53.80	1538.833	53.803	3.496	2.276		old	2.276
							1072152az1_64_Zrn	0.6175	0.0234	0.0805	0.0029		488.27	23.66	499.39	18.73	435.90	94.13	499.388	18.726	3.750	-14.565		old	-14.565		disc. inv
							1072152az1_65_Zrn	1.6083	0.0383	0.1594	0.0055		973.45	38.54	953.19	35.34	1014.15	59.22	953.195	35.338	3.707	6.011		old	6.011
							1072152az1_66_Zrn	2.5966	0.0613	0.2188	0.0076		1299.67	61.35	1275.53	48.74	1338.00	56.18	1338.000	56.176	4.199	4.669		old	4.669
							1072152az1_67_Zrn	5.9443	0.1391	0.3519	0.0122		1967.74	136.56	1943.61	78.19	1991.54	51.38	1991.544	51.378	2.580	2.407		old	2.407
							1072152az1_68_Zrn	3.2675	0.0774	0.2579	0.0089		1473.35	77.15	1479.11	57.34	1466.75	55.27	1466.747	55.274	3.768	-0.843		old	-0.843
							1072152az1_69_Zrn	undefined	undefined	undefined	undefined		undefined	undefined	undefined	undefined	undefined	undefined	undefined	undefined	#VALUE!	#VALUE!	#VALUE!	old	#VALUE!	#VALUE!	#VALUE!
							1072152az1_70_Zrn	3.3601	0.0799	0.2599	0.0090		1495.14	79.51	1489.19	57.95	1506.27	55.09	1506.266	55.090	3.657	1.134		old	1.134
							1072152az1_71_Zrn	4.0543	0.0946	0.2911	0.0101		1645.16	93.88	1647.09	64.67	1644.15	53.47	1644.147	53.471	3.252	-0.179		old	-0.179
							1072152az1_72_Zrn	2.4266	0.0564	0.2118	0.0073		1250.50	56.51	1238.43	47.05	1271.61	56.12	1271.614	56.117	4.413	2.609		old	2.609
							1072152az1_73_Zrn	3.0678	0.0716	0.2462	0.0085		1424.68	71.44	1419.01	54.57	1432.27	55.01	1432.272	55.014	3.841	0.926		old	0.926
							1072152az1_74_Zrn	4.7297	0.1108	0.3166	0.0109		1772.51	109.52	1773.25	70.27	1771.91	52.77	1771.914	52.765	2.978	-0.076		old	-0.076
							1072152az1_75_Zrn	1.6170	0.0374	0.1613	0.0056		976.82	37.65	964.25	35.82	1003.46	58.16	964.250	35.820	3.715	3.907		old	3.907
							1072152az1_76_Zrn	3.2929	0.0885	0.2514	0.0095		1479.37	87.95	1445.58	60.79	1526.67	59.99	1526.670	59.993	3.930	5.312		old	5.312
							1072152az1_77_Zrn	0.1756	0.0043	0.0250	0.0009		164.27	4.36	159.01	5.62	238.76	68.53	159.010	5.616	3.532	33.402		young	0.000
							1072152az1_78_Zrn	undefined	undefined	undefined	undefined		undefined	undefined	undefined	undefined	undefined	undefined	undefined	undefined	#VALUE!	#VALUE!	#VALUE!	old	#VALUE!	#VALUE!	#VALUE!
							1072152az1_79_Zrn	0.3452	0.0085	0.0483	0.0017		301.11	8.60	304.31	10.96	267.88	68.24	304.311	10.957	3.601	-13.601		old	-13.601		disc. inv
							1072152az1_80_Zrn	4.4305	0.1141	0.2875	0.0103		1718.06	112.63	1628.95	66.38	1824.22	55.82	1824.220	55.815	3.060	10.704		old	10.704
							1072152az1_81_Zrn	2.7841	0.0696	0.2251	0.0081		1351.29	69.49	1308.90	52.22	1415.40	58.08	1415.400	58.076	4.103	7.525		old	7.525
							1072152az1_82_Zrn	undefined	undefined	undefined	undefined		undefined	undefined	undefined	undefined	undefined	undefined	undefined	undefined	#VALUE!	#VALUE!	#VALUE!	old	#VALUE!	#VALUE!	#VALUE!
							1072152az1_83_Zrn	2.9172	0.1388	0.2149	0.0113		1386.38	136.28	1255.02	72.33	1594.82	94.84	1594.825	94.841	5.947	21.307		old	21.307
							1072152az1_84_Zrn	4.3753	0.1034	0.2971	0.0103		1707.69	102.32	1676.77	66.49	1743.14	53.31	1743.137	53.313	3.058	3.808		old	3.808
							1072152az1_85_Zrn	3.8324	0.0917	0.2738	0.0096		1599.57	91.06	1560.06	61.55	1652.62	54.21	1652.617	54.209	3.280	5.601		old	5.601
							1072152az1_86_Zrn	5.1902	0.1224	0.3267	0.0113		1851.00	120.64	1822.43	72.87	1882.14	52.20	1882.145	52.204	2.774	3.173		old	3.173
							1072152az1_87_Zrn	3.3677	0.0800	0.2629	0.0091		1496.92	79.60	1504.83	58.75	1485.60	55.20	1485.596	55.204	3.716	-1.295		old	-1.295
							1072152az1_88_Zrn	3.4794	0.0826	0.2642	0.0092		1522.56	82.21	1511.43	58.98	1534.69	54.74	1534.690	54.736	3.567	1.515		old	1.515
							1072152az1_89_Zrn	4.2306	0.1012	0.2952	0.0103		1679.98	100.24	1667.43	66.28	1689.12	53.99	1689.117	53.992	3.196	1.284		old	1.284
							1072152az1_90_Zrn	0.6972	0.0165	0.0869	0.0030		537.11	16.64	537.16	19.44	537.44	63.29	537.165	19.441	3.619	0.051		old	0.051
							1072152az1_91_Zrn	2.6537	0.0628	0.2226	0.0077		1315.67	62.82	1295.35	49.75	1350.25	56.09	1350.248	56.091	4.154	4.066		old	4.066
							1072152az1_92_Zrn	4.8981	0.1168	0.3228	0.0113		1801.93	115.23	1803.42	72.40	1793.99	53.26	1793.991	53.264	2.969	-0.526		old	-0.526
							1072152az1_93_Zrn	3.4592	0.0812	0.2644	0.0092		1517.97	80.83	1512.36	58.92	1525.25	54.45	1525.246	54.447	3.570	0.845		old	0.845
							1072152az1_94_Zrn	1.9118	0.0454	0.1816	0.0063		1085.20	45.59	1075.82	40.73	1104.60	58.30	1104.605	58.301	5.278	2.606		old	2.606
							1072152az1_95_Zrn	0.2338	0.0058	0.0332	0.0012		213.36	5.85	210.29	7.47	244.87	68.90	210.293	7.474	3.554	14.119		young	0.000
							1072152az1_96_Zrn	3.5149	0.1169	0.2521	0.0103		1530.57	115.31	1449.40	65.99	1644.83	70.17	1644.832	70.169	4.266	11.881		old	11.881
							1072152az1_97_Zrn	6.2364	0.1506	0.3532	0.0124		2009.57	147.41	1949.92	79.67	2072.40	51.87	2072.405	51.865	2.503	5.910		old	5.910
							1072152az1_98_Zrn	4.9379	0.1158	0.3233	0.0112		1808.77	114.29	1806.03	71.97	1809.20	52.50	1809.200	52.505	2.902	0.175		old	0.175
							1072152az1_99_Zrn	1.6755	0.0409	0.1677	0.0058		999.26	41.12	999.43	37.59	998.80	60.27	999.430	37.586	3.761	-0.063		old	-0.063
							1072152az1_100_Zrn	0.7126	0.0170	0.0891	0.0031		546.26	17.17	550.00	20.07	530.90	63.85	549.999	20.065	3.648	-3.598		old	-3.598
							1072152az1_101_Zrn	3.3800	0.0801	0.2548	0.0089		1499.77	79.78	1463.08	57.09	1553.10	54.67	1553.098	54.668	3.520	5.796		old	5.796
							1072152az1_102_Zrn	0.6944	0.0165	0.0877	0.0031		535.43	16.70	541.89	19.70	505.90	64.16	541.892	19.701	3.636	-7.114		old	-7.114		disc. inv
							1072152az1_103_Zrn	3.4087	0.0819	0.2651	0.0092		1506.41	81.48	1515.78	59.21	1493.16	55.60	1493.160	55.597	3.723	-1.515		old	-1.515
							1072152az1_104_Zrn	4.8944	0.1173	0.3261	0.0114		1801.29	115.75	1819.48	73.26	1781.45	53.47	1781.451	53.475	3.002	-2.135		old	-2.135
							1072152az1_105_Zrn	4.3187	0.1046	0.2939	0.0103		1696.93	103.53	1660.82	66.50	1736.76	53.98	1736.759	53.985	3.108	4.372		old	4.372
							1072152az1_106_Zrn	1.7148	0.0401	0.1712	0.0059		1014.07	40.28	1018.59	38.10	1001.18	58.52	1001.175	58.520	5.845	-1.739		old	-1.739
							1072152az1_107_Zrn	4.6844	0.1226	0.2987	0.0110		1764.46	120.87	1684.96	70.68	1860.01	56.42	1860.005	56.417	3.033	9.411		old	9.411
							1072152az1_108_Zrn	2.7029	0.0636	0.2270	0.0079		1329.24	63.57	1318.89	50.62	1346.48	55.83	1346.482	55.831	4.146	2.049		old	2.049
							1072152az1_109_Zrn	3.5742	0.0848	0.2711	0.0094		1543.81	84.32	1546.36	60.44	1541.67	54.86	1541.672	54.861	3.559	-0.304		old	-0.304
							1072152az1_110_Zrn	3.5058	0.0817	0.2688	0.0093		1528.52	81.27	1534.53	59.76	1520.77	54.25	1520.770	54.251	3.567	-0.905		old	-0.905
106	U94	52	RON1003	1072-155	5.3701600	-73.1626650																						1101782	1085349	0.0000	0.0000		104	7	1	0	Socha Superior tope	Early-Middle Eocene	Late Paleocene	Late Paleocene	Early Eocene?	Early Eocene?	6	6	This work
							1072155az1_1_Zrn	4.2611	0.1116	0.2960	0.0113		1685.88	110.29	1671.69	72.77	1700.40	59.08	1700.405	59.075	3.474	1.689		old	1.689
							1072155az1_2_Zrn	2.6971	0.0682	0.2272	0.0086		1327.67	68.10	1319.73	55.14	1340.71	60.58	1340.712	60.579	4.518	1.565		old	1.565
							1072155az1_3_Zrn	1.4616	0.0384	0.1567	0.0060		914.67	38.65	938.62	38.38	853.87	66.76	938.619	38.378	4.089	-9.925		old	-9.925		disc. inv
							1072155az1_4_Zrn	5.1176	0.1308	0.3273	0.0124		1839.04	128.61	1825.37	79.63	1852.42	57.06	1852.416	57.059	3.080	1.460		old	1.460
							1072155az1_5_Zrn	4.9413	0.1235	0.3211	0.0121		1809.33	121.68	1794.93	77.61	1824.73	56.44	1824.734	56.437	3.093	1.633		old	1.633
							1072155az1_6_Zrn	0.4271	0.0109	0.0575	0.0022		361.11	11.00	360.61	13.98	359.88	70.93	360.607	13.976	3.876	-0.203		old	-0.203
							1072155az1_7_Zrn	0.6574	0.0171	0.0823	0.0031		513.05	17.31	509.77	20.06	529.01	70.05	509.767	20.057	3.935	3.638		old	3.638
							1072155az1_8_Zrn	1.9088	0.0508	0.1768	0.0067		1084.18	50.90	1049.25	42.98	1153.06	64.37	1153.061	64.366	5.582	9.003		old	9.003
							1072155az1_9_Zrn	4.6033	0.1152	0.3102	0.0117		1749.87	113.75	1741.92	74.95	1757.39	56.94	1757.386	56.942	3.240	0.880		old	0.880
							1072155az1_10_Zrn	3.1459	0.0826	0.2499	0.0094		1443.99	82.21	1437.73	60.61	1448.68	61.23	1448.677	61.230	4.227	0.755		old	0.755
							1072155az1_11_Zrn	3.4737	0.0897	0.2630	0.0099		1521.26	89.09	1505.28	63.78	1545.80	59.74	1545.804	59.739	3.865	2.622		old	2.622
							1072155az1_12_Zrn	2.1593	0.0549	0.1928	0.0073		1168.06	54.99	1136.66	47.14	1222.66	61.96	1222.656	61.959	5.068	7.033		old	7.033
							1072155az1_13_Zrn	3.4564	0.0866	0.2650	0.0100		1517.33	86.09	1515.62	64.06	1518.40	58.76	1518.399	58.757	3.870	0.183		old	0.183
							1072155az1_14_Zrn	5.6964	0.1426	0.3479	0.0131		1930.82	139.83	1924.43	83.99	1937.22	55.71	1937.218	55.709	2.876	0.660		old	0.660
							1072155az1_15_Zrn	1.3637	0.0345	0.1434	0.0054		873.48	34.78	863.84	34.83	902.20	64.72	863.842	34.835	4.033	4.252		old	4.252
							1072155az1_16_Zrn	0.6633	0.0171	0.0831	0.0031		516.63	17.27	514.73	20.18	522.30	69.61	514.731	20.180	3.920	1.449		old	1.449
							1072155az1_17_Zrn	0.5728	0.0147	0.0733	0.0028		459.83	14.86	455.79	17.79	476.09	69.90	455.786	17.792	3.904	4.265		old	4.265
							1072155az1_18_Zrn	0.9951	0.0257	0.1117	0.0042		701.33	25.90	682.80	27.16	762.33	66.92	682.803	27.162	3.978	10.432		old	10.432
							1072155az1_19_Zrn	2.2157	0.0559	0.2029	0.0076		1186.03	55.96	1190.94	49.16	1185.15	61.81	1185.148	61.809	5.215	-0.489		old	-0.489
							1072155az1_20_Zrn	5.3112	0.1343	0.3357	0.0126		1870.67	131.99	1866.01	81.22	1875.24	56.55	1875.241	56.550	3.016	0.492		old	0.492
							1072155az1_21_Zrn	2.5833	0.0665	0.2226	0.0084		1295.90	66.39	1295.73	53.89	1291.77	61.67	1291.773	61.667	4.774	-0.306		old	-0.306
							1072155az1_22_Zrn	3.4949	0.0879	0.2627	0.0099		1526.07	87.39	1503.73	63.65	1559.69	58.60	1559.692	58.603	3.757	3.588		old	3.588
							1072155az1_23_Zrn	5.1477	0.1302	0.3291	0.0124		1844.01	128.03	1833.97	79.71	1855.10	56.66	1855.101	56.657	3.054	1.139		old	1.139
							1072155az1_24_Zrn	1.1381	0.0289	0.1261	0.0048		771.62	29.14	765.64	30.63	787.33	66.01	765.636	30.628	4.000	2.756		old	2.756
							1072155az1_25_Zrn	5.1708	0.1295	0.3251	0.0122		1847.82	127.43	1814.61	78.62	1884.05	56.12	1884.049	56.116	2.978	3.686		old	3.686
							1072155az1_26_Zrn	0.1485	0.0039	0.0220	0.0008		140.55	3.96	140.02	5.33	147.07	75.30	140.022	5.327	3.804	4.792		young	0.000
							1072155az1_27_Zrn	5.1384	0.1285	0.3266	0.0123		1842.48	126.50	1822.02	78.94	1865.37	56.18	1865.369	56.178	3.012	2.324		old	2.324
							1072155az1_28_Zrn	4.1870	0.1053	0.2957	0.0111		1671.47	104.16	1669.86	71.61	1673.28	57.71	1673.275	57.712	3.449	0.204		old	0.204
							1072155az1_29_Zrn	2.6784	0.0774	0.2238	0.0085		1322.51	77.08	1302.17	54.83	1342.52	66.58	1342.518	66.576	4.959	3.005		old	3.005
							1072155az1_30_Zrn	undefined	undefined	undefined	undefined		undefined	undefined	undefined	undefined	undefined	undefined	undefined	undefined	#VALUE!	#VALUE!	#VALUE!	old	#VALUE!	#VALUE!	#VALUE!
							1072155az1_31_Zrn	4.4568	0.1128	0.3053	0.0115		1722.97	111.44	1717.70	73.97	1728.95	57.61	1728.948	57.606	3.332	0.650		old	0.650
							1072155az1_32_Zrn	1.4424	0.0365	0.1503	0.0057		906.70	36.76	902.78	36.51	916.75	64.53	902.780	36.509	4.044	1.524		old	1.524
							1072155az1_33_Zrn	2.1978	0.0554	0.1997	0.0075		1180.36	55.44	1173.96	48.34	1191.72	61.67	1191.721	61.672	5.175	1.491		old	1.491
							1072155az1_34_Zrn	0.6301	0.0166	0.0800	0.0030		496.14	16.78	496.34	19.42	493.38	70.94	496.339	19.421	3.913	-0.599		old	-0.599
							1072155az1_35_Zrn	0.3051	0.0098	0.0415	0.0016		270.35	9.90	262.39	10.11	325.33	83.88	262.385	10.114	3.855	19.348		young	0.000
							1072155az1_36_Zrn	0.0910	0.0027	0.0136	0.0005		88.39	2.69	87.14	3.34	117.31	81.49	87.143	3.338	3.830	25.714		young	0.000
							1072155az1_37_Zrn	0.2644	0.0067	0.0371	0.0014		238.17	6.81	234.70	9.03	272.14	71.97	234.701	9.027	3.846	13.759		young	0.000
							1072155az1_38_Zrn	0.0975	0.0031	0.0136	0.0005		94.49	3.17	87.35	3.35	270.52	84.93	87.350	3.353	3.839	67.710		young	0.000
							1072155az1_39_Zrn	0.7935	0.0204	0.0952	0.0036		593.16	20.65	586.05	23.08	617.60	68.46	586.054	23.075	3.937	5.108		old	5.108
							1072155az1_40_Zrn	3.4291	0.0863	0.2613	0.0098		1511.08	85.76	1496.67	63.31	1530.67	58.83	1530.666	58.830	3.843	2.221		old	2.221
							1072155az1_41_Zrn	0.1731	0.0058	0.0230	0.0009		162.07	5.85	146.40	5.62	386.56	85.70	146.398	5.622	3.840	62.128		young	0.000
							1072155az1_42_Zrn	2.0435	0.0549	0.1900	0.0071		1130.13	54.98	1121.13	45.93	1141.75	64.76	1141.747	64.762	5.672	1.806		old	1.806
							1072155az1_43_Zrn	1.7741	0.0448	0.1739	0.0066		1036.02	44.96	1033.82	42.16	1040.63	63.19	1040.631	63.187	6.072	0.654		old	0.654
							1072155az1_44_Zrn	0.1602	0.0098	0.0222	0.0009		150.84	9.89	141.31	5.50	300.00	143.50	141.311	5.496	3.889	52.896		young	0.000
							1072155az1_45_Zrn	0.8567	0.0242	0.0991	0.0038		628.34	24.45	609.40	24.76	701.76	72.50	609.404	24.764	4.064	13.160		old	13.160
							1072155az1_46_Zrn	0.6616	0.0170	0.0828	0.0031		515.59	17.19	512.68	20.10	524.79	69.46	512.679	20.104	3.921	2.308		old	2.308
							1072155az1_47_Zrn	0.8567	0.0234	0.1026	0.0039		628.31	23.67	629.34	24.95	613.61	71.48	629.340	24.953	3.965	-2.564		old	-2.564
							1072155az1_48_Zrn	1.5809	0.0409	0.1589	0.0060		962.73	41.11	950.60	38.59	991.51	64.74	950.600	38.585	4.059	4.126		old	4.126
							1072155az1_49_Zrn	2.9414	0.0737	0.2404	0.0090		1392.63	73.47	1388.71	58.17	1401.02	59.70	1401.015	59.701	4.261	0.878		old	0.878
							1072155az1_50_Zrn	0.7080	0.0179	0.0864	0.0033		543.59	18.13	534.43	20.97	557.97	68.42	534.425	20.969	3.924	4.219		old	4.219
							1072155az1_51_Zrn	0.7177	0.0316	0.0872	0.0033		549.28	31.82	538.93	21.46	571.87	103.59	538.932	21.459	3.982	5.759		old	5.759
							1072155az1_52_Zrn	22.4070	0.5646	0.6314	0.0239		3201.54	504.98	3154.99	152.94	3229.95	49.43	3229.954	49.429	1.530	2.321		old	2.321
							1072155az1_53_Zrn	4.5088	0.1131	0.3062	0.0115		1732.59	111.73	1722.17	74.00	1742.14	57.14	1742.141	57.140	3.280	1.146		old	1.146
							1072155az1_54_Zrn	0.6324	0.0164	0.0804	0.0030		497.61	16.56	498.45	19.53	491.85	70.12	498.450	19.526	3.917	-1.342		old	-1.342
							1072155az1_55_Zrn	3.2170	0.0810	0.2523	0.0095		1461.25	80.59	1450.56	61.05	1476.24	59.27	1476.245	59.269	4.015	1.740		old	1.740
							1072155az1_56_Zrn	1.5975	0.0404	0.1612	0.0061		969.24	40.59	963.40	39.08	981.78	63.82	963.400	39.079	4.056	1.872		old	1.872
							1072155az1_57_Zrn	3.3808	0.0851	0.2616	0.0099		1499.96	84.67	1498.25	63.38	1500.37	59.13	1500.365	59.128	3.941	0.141		old	0.141
							1072155az1_58_Zrn	1.7045	0.0467	0.1673	0.0064		1010.24	46.92	997.44	40.94	1030.07	67.05	997.443	40.941	4.105	3.167		old	3.167
							1072155az1_59_Zrn	3.1373	0.0809	0.2509	0.0095		1441.89	80.56	1443.16	60.82	1442.55	60.51	1442.548	60.507	4.194	-0.042		old	-0.042
							1072155az1_60_Zrn	0.6637	0.0171	0.0828	0.0031		516.90	17.32	513.07	20.12	530.39	69.64	513.073	20.119	3.921	3.265		old	3.265
							1072155az1_61_Zrn	0.9151	0.0235	0.1067	0.0040		659.75	23.67	653.55	25.90	675.33	67.57	653.549	25.900	3.963	3.226		old	3.226
							1072155az1_62_Zrn	4.9801	0.1248	0.3205	0.0121		1815.95	122.89	1791.93	77.49	1843.98	56.37	1843.982	56.369	3.057	2.823		old	2.823
							1072155az1_63_Zrn	4.8021	0.1206	0.3201	0.0120		1785.26	118.94	1790.07	77.40	1781.13	56.90	1781.130	56.903	3.195	-0.502		old	-0.502
							1072155az1_64_Zrn	2.2382	0.0578	0.2004	0.0076		1193.10	57.89	1177.34	48.70	1219.43	62.55	1219.428	62.546	5.129	3.451		old	3.451
							1072155az1_65_Zrn	2.5061	0.0639	0.2172	0.0082		1273.79	63.90	1266.91	52.68	1282.36	61.48	1282.363	61.478	4.794	1.205		old	1.205
							1072155az1_66_Zrn	1.6348	0.0452	0.1604	0.0061		983.71	45.34	958.74	38.98	1036.44	67.15	958.745	38.980	4.066	7.497		old	7.497
							1072155az1_67_Zrn	3.3492	0.0856	0.2619	0.0099		1492.60	85.08	1499.80	63.39	1480.77	59.81	1480.774	59.806	4.039	-1.285		old	-1.285
							1072155az1_68_Zrn	0.6191	0.0164	0.0790	0.0030		489.25	16.61	490.35	19.17	476.25	71.48	490.347	19.168	3.909	-2.960		old	-2.960
							1072155az1_69_Zrn	1.3111	0.0334	0.1389	0.0052		850.62	33.66	838.24	33.77	881.02	65.23	838.240	33.766	4.028	4.855		old	4.855
							1072155az1_70_Zrn	1.4434	0.0370	0.1516	0.0057		907.15	37.23	909.87	36.78	900.65	65.23	909.871	36.779	4.042	-1.023		old	-1.023
							1072155az1_71_Zrn	3.2267	0.0815	0.2543	0.0096		1463.60	81.08	1460.69	61.55	1467.48	59.46	1467.479	59.461	4.052	0.462		old	0.462
							1072155az1_72_Zrn	0.8435	0.0224	0.1002	0.0038		621.10	22.62	615.36	24.36	638.76	69.62	615.361	24.356	3.958	3.663		old	3.663
							1072155az1_73_Zrn	4.7337	0.1190	0.3156	0.0119		1773.22	117.41	1768.29	76.30	1780.13	56.96	1780.129	56.961	3.200	0.665		old	0.665
							1072155az1_74_Zrn	3.4814	0.0874	0.2650	0.0100		1523.01	86.85	1515.18	64.11	1533.63	58.71	1533.635	58.713	3.828	1.203		old	1.203
							1072155az1_75_Zrn	1.9707	0.0522	0.1840	0.0070		1105.55	52.31	1088.59	44.75	1145.08	64.16	1145.077	64.156	5.603	4.933		old	4.933
							1072155az1_76_Zrn	0.2571	0.0111	0.0368	0.0014		232.29	11.19	233.16	9.24	220.15	107.73	233.159	9.244	3.965	-5.907		young	0.000
							1072155az1_77_Zrn	0.8203	0.0212	0.1002	0.0038		608.22	21.39	615.62	24.32	580.61	68.97	615.621	24.320	3.951	-6.030		old	-6.030		disc. inv
							1072155az1_78_Zrn	13.3239	0.3339	0.5163	0.0194		2702.88	313.54	2683.49	124.66	2716.56	51.40	2716.556	51.403	1.892	1.217		old	1.217
							1072155az1_79_Zrn	2.2454	0.0576	0.2099	0.0080		1195.36	57.68	1228.30	51.32	1155.19	62.70	1155.187	62.702	5.428	-6.330		old	-6.330		disc. inv
							1072155az1_80_Zrn	10.6181	0.4495	0.4515	0.0256		2490.29	411.70	2402.00	163.85	2563.12	81.78	2563.117	81.781	3.191	6.286		old	6.286
							1072155az1_81_Zrn	3.5503	0.0924	0.2648	0.0100		1538.51	91.70	1514.25	64.21	1570.94	59.85	1570.945	59.854	3.810	3.609		old	3.609
							1072155az1_82_Zrn	1.6252	0.0420	0.1620	0.0062		980.01	42.19	968.14	39.74	1012.38	64.55	968.138	39.736	4.104	4.370		old	4.370
							1072155az1_83_Zrn	2.5466	0.0644	0.2200	0.0083		1285.46	64.34	1282.13	53.38	1287.91	61.01	1287.908	61.012	4.737	0.449		old	0.449
							1072155az1_84_Zrn	10.0078	0.2509	0.4502	0.0170		2435.50	240.02	2396.31	108.91	2468.78	52.68	2468.776	52.675	2.134	2.935		old	2.935
							1072155az1_85_Zrn	0.0784	0.0087	0.0112	0.0006		76.66	8.80	71.52	3.57	228.46	255.25	71.516	3.571	4.994	68.697		young	0.000
							1072155az1_86_Zrn	4.8515	0.1228	0.3154	0.0119		1793.88	121.03	1767.28	76.30	1826.08	56.89	1826.085	56.890	3.115	3.221		old	3.221
							1072155az1_87_Zrn	2.8509	0.0745	0.2352	0.0089		1369.04	74.28	1361.94	57.01	1376.59	61.59	1376.586	61.594	4.474	1.064		old	1.064
							1072155az1_88_Zrn	4.4411	0.1123	0.3057	0.0115		1720.03	110.96	1719.38	74.14	1722.04	57.65	1722.038	57.653	3.348	0.154		old	0.154
							1072155az1_89_Zrn	4.9719	0.1246	0.3216	0.0121		1814.56	122.77	1797.34	77.75	1833.51	56.49	1833.515	56.488	3.081	1.973		old	1.973
							1072155az1_90_Zrn	9.8114	0.2517	0.4404	0.0168		2417.22	240.69	2352.33	107.93	2473.14	53.64	2473.136	53.636	2.169	4.885		old	4.885
							1072155az1_91_Zrn	1.8743	0.0479	0.1794	0.0068		1072.05	48.01	1063.79	43.54	1090.24	63.20	1090.239	63.201	5.797	2.426		old	2.426
							1072155az1_92_Zrn	0.2401	0.0064	0.0340	0.0013		218.54	6.46	215.46	8.27	246.78	74.37	215.457	8.265	3.836	12.694		young	0.000
							1072155az1_93_Zrn	0.0574	0.0018	0.0079	0.0003		56.71	1.79	50.79	1.93	309.74	81.42	50.794	1.926	3.792	83.601		young	0.000
							1072155az1_94_Zrn	0.7160	0.0243	0.0894	0.0034		548.28	24.51	552.09	21.84	523.53	84.73	552.087	21.840	3.956	-5.454		old	-5.454		disc. inv
							1072155az1_95_Zrn	0.5765	0.0147	0.0740	0.0028		462.24	14.87	460.12	17.97	468.68	69.75	460.121	17.968	3.905	1.827		old	1.827
							1072155az1_96_Zrn	2.2399	0.0572	0.2042	0.0077		1193.62	57.25	1197.70	49.50	1195.16	62.19	1195.156	62.190	5.203	-0.213		old	-0.213
							1072155az1_97_Zrn	1.7134	0.0435	0.1686	0.0064		1013.56	43.71	1004.57	40.95	1033.31	63.49	1033.306	63.485	6.144	2.781		old	2.781
							1072155az1_98_Zrn	3.4528	0.0888	0.2637	0.0100		1516.51	88.20	1508.84	64.03	1525.76	59.78	1525.757	59.783	3.918	1.109		old	1.109
							1072155az1_99_Zrn	1.6569	0.0418	0.1667	0.0063		992.18	41.97	993.79	40.42	988.68	63.60	993.788	40.421	4.067	-0.517		old	-0.517
							1072155az1_100_Zrn	0.6423	0.0167	0.0813	0.0031		503.72	16.85	503.84	19.79	495.96	70.21	503.841	19.791	3.928	-1.588		old	-1.588
							1072155az1_101_Zrn	0.8899	0.0229	0.1040	0.0039		646.33	23.11	638.03	25.27	673.40	67.78	638.029	25.275	3.961	5.252		old	5.252
							1072155az1_102_Zrn	0.6707	0.0171	0.0834	0.0031		521.12	17.25	516.09	20.28	543.73	68.76	516.094	20.277	3.929	5.082		old	5.082
							1072155az1_103_Zrn	2.8198	0.0711	0.2307	0.0087		1360.81	70.97	1338.21	56.05	1395.42	60.07	1395.421	60.067	4.305	4.100		old	4.100
							1072155az1_104_Zrn	2.2768	0.0589	0.2039	0.0077		1205.12	58.94	1196.35	49.52	1217.36	62.60	1217.358	62.599	5.142	1.726		old	1.726
							1072155az1_105_Zrn	2.5041	0.0634	0.2169	0.0082		1273.23	63.40	1265.59	52.54	1288.30	61.04	1288.303	61.042	4.738	1.763		old	1.763
							1072155az1_106_Zrn	2.2318	0.0577	0.1979	0.0075		1191.10	57.77	1164.14	48.16	1229.64	62.50	1229.639	62.502	5.083	5.327		old	5.327
							1072155az1_107_Zrn	0.6489	0.0168	0.0830	0.0031		507.78	16.97	513.99	20.23	477.41	70.41	513.989	20.234	3.937	-7.663		old	-7.663		disc. inv
							1072155az1_108_Zrn	2.6146	0.0669	0.2239	0.0084		1304.75	66.80	1302.34	54.33	1306.49	61.30	1306.488	61.299	4.692	0.317		old	0.317
							1072155az1_109_Zrn	1.4091	0.0354	0.1478	0.0056		892.76	35.66	888.76	35.81	898.60	64.39	888.765	35.808	4.029	1.095		old	1.095
							1072155az1_110_Zrn	3.3548	0.0844	0.2585	0.0097		1493.90	83.99	1482.23	62.68	1508.63	59.00	1508.630	58.998	3.911	1.750		old	1.750
107	U95	53	RON-1004	1072-156	5.370275	-73.161266																						1101937	1085362	0.0000	0.0000		107	17	3	0	Picacho Base	Early-Middle Eocene		Early - Middle Eocene	Early Eocene	Early Eocene	13	13	This work
							1072156az1_1_Zrn	1.6269	0.0511	0.1656	0.0075		980.67	51.27	987.80	48.48	963.13	78.37	987.803	48.480	4.908	-2.562		old	-2.562
							1072156az1_2_Zrn	5.0841	0.1553	0.3288	0.0150		1833.46	151.88	1832.80	96.08	1831.85	68.31	1831.854	68.311	3.729	-0.052		old	-0.052
							1072156az1_3_Zrn	3.2431	0.1054	0.2464	0.0115		1467.54	104.25	1419.86	74.19	1571.38	73.63	1571.384	73.634	4.686	9.643		old	9.643
							1072156az1_4_Zrn	6.6632	0.2057	0.3779	0.0172		2067.75	198.81	2066.24	110.56	2065.99	66.98	2065.989	66.985	3.242	-0.012		old	-0.012
							1072156az1_5_Zrn	0.1276	0.0047	0.0184	0.0008		121.90	4.80	117.64	5.46	198.54	99.98	117.643	5.462	4.643	40.747		young	0.000
							1072156az1_6_Zrn	0.1783	0.0066	0.0247	0.0011		166.57	6.67	157.05	7.27	284.28	98.05	157.047	7.272	4.630	44.756		young	0.000
							1072156az1_7_Zrn	0.0550	0.0021	0.0076	0.0004		54.36	2.18	49.03	2.30	285.91	102.10	49.028	2.300	4.692	82.852		young	0.000
							1072156az1_8_Zrn	2.6337	0.0821	0.2254	0.0103		1310.09	81.68	1310.39	66.25	1308.78	74.15	1308.785	74.148	5.665	-0.123		old	-0.123
							1072156az1_9_Zrn	1.6850	0.0519	0.1686	0.0077		1002.89	52.00	1004.27	49.32	997.94	76.93	997.937	76.932	7.709	-0.634		old	-0.634
							1072156az1_10_Zrn	2.1551	0.0655	0.1983	0.0090		1166.69	65.48	1166.31	57.94	1167.73	74.42	1167.726	74.418	6.373	0.121		old	0.121
							1072156az1_11	2.3394	0.0737	0.2027	0.0094		1224.35	73.50	1189.88	60.24	1284.05	74.97	1284.048	74.965	5.838	7.334		old	7.334
							1072156az1_12_Zrn	3.1061	0.1036	0.2522	0.0115		1434.20	102.59	1449.85	73.98	1404.57	76.73	1404.566	76.730	5.463	-3.224		old	-3.224
							1072156az1_13_Zrn	0.8904	0.0273	0.1041	0.0047		646.61	27.50	638.55	30.49	673.47	80.72	638.547	30.495	4.776	5.185		old	5.185
							1072156az1_14_Zrn	1.8828	0.0639	0.1801	0.0082		1075.05	63.84	1067.55	52.84	1084.60	81.13	1084.602	81.129	7.480	1.572		old	1.572
							1072156az1_15_Zrn	0.3291	0.0107	0.0438	0.0020		288.87	10.86	276.38	12.90	389.54	88.38	276.382	12.896	4.666	29.050		young	0.000
							1072156az1_16_Zrn	0.7599	0.0253	0.0921	0.0042		573.95	25.57	568.10	27.05	593.46	86.69	568.098	27.049	4.761	4.274		old	4.274
							1072156az1_17_Zrn	2.8870	0.1148	0.2343	0.0124		1378.52	113.35	1356.77	79.95	1410.72	89.91	1410.717	89.909	6.373	3.824		old	3.824
							1072156az1_18_Zrn	0.7631	0.0234	0.0916	0.0042		575.77	23.63	564.81	26.84	615.34	81.61	564.808	26.840	4.752	8.212		old	8.212
							1072156az1_19_Zrn	2.5621	0.0788	0.2222	0.0101		1289.88	78.50	1293.45	64.97	1278.36	73.83	1278.356	73.834	5.776	-1.180		old	-1.180
							1072156az1_20_Zrn	3.7398	0.1142	0.2728	0.0124		1579.94	112.77	1555.16	79.68	1611.05	70.23	1611.055	70.228	4.359	3.470		old	3.470
							1072156az1_21_Zrn	4.7807	0.1502	0.3088	0.0141		1781.52	147.06	1734.61	90.43	1836.40	69.64	1836.405	69.636	3.792	5.543		old	5.543
							1072156az1_22_Zrn	2.3799	0.0763	0.2113	0.0096		1236.57	76.06	1235.72	61.97	1236.07	76.42	1236.071	76.416	6.182	0.028		old	0.028
							1072156az1_23_Zrn	0.0704	0.0046	0.0103	0.0005		69.08	4.71	65.93	3.15	180.61	160.62	65.927	3.152	4.781	63.496		young	0.000
							1072156az1_24_Zrn	4.7628	0.1452	0.3186	0.0145		1778.37	142.35	1782.92	93.00	1770.74	68.77	1770.744	68.768	3.884	-0.687		old	-0.687
							1072156az1_25_Zrn	1.2776	0.0399	0.1395	0.0064		835.77	40.09	841.92	40.93	814.93	79.96	841.921	40.932	4.862	-3.312		old	-3.312
							1072156az1_26_Zrn	4.7227	0.1453	0.3151	0.0143		1771.27	142.42	1765.64	92.09	1775.75	69.14	1775.746	69.142	3.894	0.569		old	0.569
							1072156az1_27_Zrn	4.5061	0.1387	0.2999	0.0137		1732.09	136.18	1690.61	87.96	1781.26	69.16	1781.261	69.156	3.882	5.089		old	5.089
							1072156az1_28_Zrn	3.2139	0.0977	0.2528	0.0115		1460.52	96.90	1453.07	73.83	1470.29	71.34	1470.293	71.343	4.852	1.171		old	1.171
							1072156az1_29_Zrn	1.6053	0.0498	0.1613	0.0073		972.27	49.98	963.95	47.24	986.32	77.51	963.954	47.241	4.901	2.268		old	2.268
							1072156az1_30_Zrn	3.3261	0.1091	0.2530	0.0115		1487.20	107.91	1453.81	74.14	1527.92	74.57	1527.916	74.569	4.880	4.850		old	4.850
							1072156az1_31_Zrn	1.9653	0.0601	0.1851	0.0084		1103.72	60.09	1094.60	54.13	1122.21	75.17	1122.205	75.170	6.698	2.460		old	2.460
							1072156az1_32_Zrn	3.1691	0.1015	0.2518	0.0115		1449.66	100.52	1447.83	73.82	1450.45	74.13	1450.450	74.132	5.111	0.180		old	0.180
							1072156az1_33_Zrn	0.0904	0.0035	0.0123	0.0006		87.89	3.51	78.85	3.64	328.08	100.19	78.851	3.635	4.611	75.966		young	0.000
							1072156az1_34_Zrn	2.2014	0.0681	0.1993	0.0091		1181.50	68.03	1171.47	58.31	1195.57	74.99	1195.566	74.989	6.272	2.015		old	2.015
							1072156az1_35_Zrn	1.6542	0.0504	0.1642	0.0075		991.17	50.56	979.80	48.03	1015.92	76.20	979.800	48.029	4.902	3.555		old	3.555
							1072156az1_36_Zrn	0.5761	0.0235	0.0665	0.0031		461.97	23.73	414.76	19.68	699.52	98.87	414.762	19.683	4.746	40.708		old	40.708	disc
							1072156az1_37_Zrn	0.0898	0.0042	0.0119	0.0005		87.36	4.30	76.37	3.52	355.09	116.36	76.371	3.523	4.613	78.493		young	0.000
							1072156az1_38_Zrn	1.8582	0.0573	0.1798	0.0082		1066.35	57.39	1065.70	52.63	1067.68	76.27	1067.681	76.267	7.143	0.186		old	0.186
							1072156az1_39_Zrn	1.5638	0.0491	0.1574	0.0072		955.96	49.23	942.21	46.04	980.20	78.17	942.208	46.045	4.887	3.876		old	3.876
							1072156az1_40_Zrn	4.6126	0.1404	0.3124	0.0142		1751.56	137.78	1752.41	91.13	1749.58	68.86	1749.584	68.860	3.936	-0.162		old	-0.162
							1072156az1_41_Zrn	3.2756	0.0999	0.2539	0.0115		1475.27	98.95	1458.76	74.24	1499.84	71.21	1499.835	71.208	4.748	2.739		old	2.739
							1072156az1_42_Zrn	2.0445	0.0633	0.1919	0.0087		1130.47	63.28	1131.68	56.10	1124.07	75.82	1124.073	75.817	6.745	-0.677		old	-0.677
							1072156az1_43_Zrn	4.8428	0.1489	0.3136	0.0143		1792.36	145.83	1758.53	91.79	1830.42	68.70	1830.416	68.699	3.753	3.927		old	3.927
							1072156az1_44_Zrn	0.0909	0.0104	0.0116	0.0006		88.37	10.50	74.17	3.70	493.62	247.76	74.174	3.695	4.982	84.974		young	0.000
							1072156az1_45_Zrn	6.3879	0.1946	0.3703	0.0168		2030.61	188.57	2030.65	107.93	2028.53	66.64	2028.528	66.641	3.285	-0.105		old	-0.105
							1072156az1_46_Zrn	4.5926	0.1404	0.3109	0.0141		1747.93	137.74	1745.30	90.73	1747.92	69.07	1747.920	69.074	3.952	0.150		old	0.150
							1072156az1_47_Zrn	1.4479	0.0488	0.1457	0.0067		909.00	48.96	876.97	42.84	979.59	82.21	876.968	42.842	4.885	10.476		old	10.476
							1072156az1_48_Zrn	0.1019	0.0069	0.0129	0.0006		98.53	7.01	82.93	3.99	486.33	156.60	82.931	3.989	4.810	82.947		young	0.000
							1072156az1_49_Zrn	5.3826	0.1657	0.3296	0.0150		1882.08	161.60	1836.52	96.39	1935.82	67.87	1935.815	67.872	3.506	5.130		old	5.130
							1072156az1_50_Zrn	2.4528	0.0756	0.2195	0.0100		1258.26	75.36	1279.47	64.24	1220.66	74.55	1220.656	74.549	6.107	-4.818		old	-4.818
							1072156az1_51_Zrn	3.3941	0.1063	0.2600	0.0118		1503.03	105.18	1490.08	76.12	1521.33	72.31	1521.326	72.309	4.753	2.054		old	2.054
							1072156az1_52_Zrn	4.4436	0.1360	0.3032	0.0138		1720.51	133.60	1707.12	88.57	1737.75	69.20	1737.752	69.203	3.982	1.763		old	1.763
							1072156az1_53_Zrn	0.0566	0.0031	0.0075	0.0004		55.93	3.19	48.39	2.27	377.51	133.58	48.386	2.265	4.682	87.183		young	0.000
							1072156az1_54_Zrn	0.2542	0.0092	0.0348	0.0016		229.99	9.34	220.59	10.31	316.13	96.63	220.586	10.314	4.676	30.223		young	0.000
							1072156az1_55_Zrn	0.1826	0.0084	0.0232	0.0011		170.27	8.54	147.57	6.91	486.48	112.76	147.572	6.913	4.685	69.666		young	0.000
							1072156az1_56_Zrn	0.1777	0.0062	0.0243	0.0011		166.07	6.32	154.68	7.17	301.29	94.49	154.678	7.167	4.634	48.661		young	0.000
							1072156az1_57_Zrn	3.1467	0.0958	0.2451	0.0111		1444.18	95.01	1413.11	71.63	1492.18	71.19	1492.183	71.192	4.771	5.299		old	5.299
							1072156az1_58_Zrn	0.2735	0.0095	0.0393	0.0018		245.52	9.65	248.26	11.58	213.46	95.43	248.264	11.577	4.663	-16.307		young	0.000
							1072156az1_59_Zrn	2.5409	0.0780	0.2208	0.0100		1283.82	77.74	1286.27	64.58	1274.62	73.80	1274.619	73.801	5.790	-0.914		old	-0.914
							1072156az1_60_Zrn	0.0878	0.0033	0.0123	0.0006		85.42	3.34	78.63	3.64	268.78	99.70	78.632	3.638	4.627	70.745		young	0.000
							1072156az1_61_Zrn	1.7682	0.0538	0.1716	0.0078		1033.85	53.93	1020.77	50.14	1062.32	75.61	1062.323	75.607	7.117	3.911		old	3.911
							1072156az1_62_Zrn	1.6834	0.0518	0.1680	0.0077		1002.29	51.96	1001.35	49.26	1006.50	76.82	1006.505	76.820	7.632	0.512		old	0.512
							1072156az1_63_Zrn	2.5227	0.0772	0.2167	0.0099		1278.61	76.95	1264.34	63.37	1303.84	73.30	1303.838	73.304	5.622	3.029		old	3.029
							1072156az1_64_Zrn	14.9874	0.4575	0.5279	0.0240		2814.44	418.33	2732.80	153.90	2873.08	61.28	2873.084	61.284	2.133	4.883		old	4.883
							1072156az1_65_Zrn	0.1602	0.0074	0.0224	0.0011		150.85	7.45	142.97	6.93	237.38	117.48	142.972	6.931	4.848	39.771		young	0.000
							1072156az1_66_Zrn	3.3768	0.1035	0.2631	0.0120		1499.04	102.51	1505.79	76.98	1487.84	71.56	1487.837	71.560	4.810	-1.207		old	-1.207
							1072156az1_67_Zrn	0.1690	0.0134	0.0218	0.0011		158.52	13.60	138.98	7.06	458.92	183.37	138.979	7.059	5.080	69.716		young	0.000
							1072156az1_68_Zrn	4.7665	0.1456	0.3156	0.0143		1779.01	142.74	1767.97	92.15	1790.91	68.65	1790.915	68.653	3.833	1.281		old	1.281
							1072156az1_69_Zrn	3.7938	0.1171	0.2745	0.0125		1591.43	115.56	1563.43	80.39	1624.90	70.65	1624.900	70.655	4.348	3.783		old	3.783
							1072156az1_70_Zrn	3.3329	0.1015	0.2567	0.0117		1488.80	100.54	1473.09	75.00	1510.35	71.03	1510.348	71.031	4.703	2.467		old	2.467
							1072156az1_71_Zrn	2.0880	0.0636	0.1928	0.0088		1144.86	63.60	1136.64	56.34	1159.01	74.61	1159.012	74.614	6.438	1.930		old	1.930
							1072156az1_72_Zrn	0.7602	0.0233	0.0932	0.0042		574.13	23.53	574.40	27.29	573.61	82.09	574.405	27.288	4.751	-0.138		old	-0.138
							1072156az1_73_Zrn	2.5596	0.0786	0.2200	0.0100		1289.18	78.29	1282.09	64.37	1298.01	73.56	1298.008	73.561	5.667	1.227		old	1.227
							1072156az1_74_Zrn	2.8554	0.0879	0.2341	0.0107		1370.24	87.32	1356.06	68.57	1391.65	72.74	1391.645	72.742	5.227	2.557		old	2.557
							1072156az1_75_Zrn	0.2634	0.0081	0.0379	0.0017		237.44	8.18	240.05	11.11	210.17	87.43	240.053	11.114	4.630	-14.221		young	0.000
							1072156az1_76_Zrn	5.4430	0.1657	0.3322	0.0151		1891.65	161.61	1849.10	97.00	1939.33	67.32	1939.334	67.322	3.471	4.653		old	4.653
							1072156az1_77_Zrn	0.0917	0.0033	0.0131	0.0006		89.08	3.37	83.81	3.86	232.48	97.94	83.806	3.862	4.608	63.951		young	0.000
							1072156az1_78_Zrn	4.4836	0.1386	0.2999	0.0138		1727.95	136.10	1690.74	88.55	1776.00	69.57	1775.998	69.574	3.917	4.801		old	4.801
							1072156az1_79_Zrn	3.6150	0.1117	0.2635	0.0120		1552.83	110.32	1507.60	77.02	1613.43	70.76	1613.428	70.756	4.385	6.559		old	6.559
							1072156az1_80_Zrn	0.3151	0.0118	0.0439	0.0020		278.09	11.92	277.11	13.10	283.11	99.32	277.115	13.099	4.727	2.117		young	0.000
							1072156az1_81_Zrn	2.9513	0.0918	0.2391	0.0109		1395.19	91.11	1381.97	70.06	1421.63	72.85	1421.631	72.853	5.125	2.790		old	2.790
							1072156az1_82_Zrn	undefined	undefined	undefined	undefined		undefined	undefined	undefined	undefined	undefined	undefined	undefined	undefined	#VALUE!	#VALUE!	#VALUE!	old	#VALUE!	#VALUE!	#VALUE!
							1072156az1_83_Zrn	0.0812	0.0026	0.0120	0.0005		79.30	2.63	76.76	3.53	146.92	91.03	76.763	3.527	4.595	47.751		young	0.000
							1072156az1_84_Zrn	0.6124	0.0194	0.0770	0.0035		485.04	19.64	477.91	22.62	509.00	84.98	477.912	22.616	4.732	6.107		old	6.107
							1072156az1_85_Zrn	1.0308	0.0316	0.1177	0.0053		719.34	31.82	717.40	34.44	726.63	79.98	717.395	34.441	4.801	1.271		old	1.271
							1072156az1_86_Zrn	2.0654	0.0640	0.1914	0.0087		1137.40	63.93	1129.02	55.97	1151.43	75.49	1151.426	75.486	6.556	1.946		old	1.946
							1072156az1_87_Zrn	2.7417	0.0845	0.2284	0.0104		1339.85	84.01	1326.17	66.76	1359.54	73.05	1359.543	73.055	5.373	2.455		old	2.455
							1072156az1_88_Zrn	6.4566	0.1983	0.3724	0.0170		2040.01	191.99	2040.75	109.06	2040.58	66.68	2040.577	66.678	3.268	-0.009		old	-0.009
							1072156az1_89_Zrn	3.2298	0.1015	0.2501	0.0114		1464.33	100.49	1438.92	73.54	1497.17	72.63	1497.173	72.626	4.851	3.891		old	3.891
							1072156az1_90_Zrn	1.6136	0.0497	0.1615	0.0074		975.50	49.80	965.25	47.31	998.86	76.91	965.247	47.307	4.901	3.366		old	3.366
							1072156az1_91_Zrn	1.5520	0.0492	0.1580	0.0072		951.28	49.39	945.70	46.40	958.78	79.08	945.702	46.405	4.907	1.364		old	1.364
							1072156az1_92_Zrn	0.1014	0.0053	0.0140	0.0007		98.06	5.39	89.82	4.21	295.57	129.09	89.821	4.209	4.686	69.611		young	0.000
							1072156az1_93_Zrn	0.3156	0.0106	0.0419	0.0019		278.49	10.75	264.55	12.32	394.03	90.14	264.549	12.317	4.656	32.861		young	0.000
							1072156az1_94_Zrn	0.6804	0.0218	0.0850	0.0039		527.02	22.02	525.88	25.07	532.16	85.28	525.882	25.072	4.768	1.180		old	1.180
							1072156az1_95_Zrn	1.5315	0.0476	0.1569	0.0071		943.11	47.77	939.40	45.95	954.69	77.94	939.402	45.950	4.891	1.602		old	1.602
							1072156az1_96_Zrn	5.6126	0.1717	0.3469	0.0158		1918.04	167.27	1919.80	101.24	1915.82	67.70	1915.823	67.703	3.534	-0.208		old	-0.208
							1072156az1_97_Zrn	3.2994	0.1022	0.2554	0.0116		1480.91	101.20	1466.41	74.69	1501.78	71.90	1501.777	71.896	4.787	2.355		old	2.355
							1072156az1_98_Zrn	2.7962	0.0881	0.2290	0.0104		1354.53	87.57	1329.14	67.15	1394.28	73.87	1394.280	73.865	5.298	4.672		old	4.672
							1072156az1_99_Zrn	0.0830	0.0030	0.0116	0.0005		80.98	3.07	74.63	3.43	265.54	97.68	74.632	3.428	4.593	71.895		young	0.000
							1072156az1_100_Zrn	0.2402	0.0078	0.0346	0.0016		218.56	7.92	219.05	10.17	187.86	91.46	219.048	10.169	4.642	-16.604		young	0.000
							1072156az1_102_Zrn	6.3889	0.1951	0.3669	0.0167		2030.75	189.00	2014.63	107.09	2047.26	66.61	2047.263	66.612	3.254	1.594		old	1.594
							1072156az1_103_Zrn	1.6383	0.0511	0.1645	0.0075		985.07	51.19	981.60	48.18	991.74	77.66	981.598	48.181	4.908	1.023		old	1.023
							1072156az1_104_Zrn	2.3485	0.0716	0.2061	0.0094		1227.10	71.45	1207.94	60.21	1258.91	73.58	1258.908	73.581	5.845	4.048		old	4.048
							1072156az1_105_Zrn	0.3123	0.0099	0.0427	0.0019		275.97	10.08	269.32	12.54	332.85	87.81	269.325	12.538	4.655	19.084		young	0.000
							1072156az1_106_Zrn	0.1749	0.0064	0.0261	0.0012		163.62	6.50	165.82	7.70	126.21	100.55	165.821	7.696	4.641	-31.385		young	0.000
[truncated: 2,260 more rows]
